# Supplementary material for: SARS-CoV-2 shifting transmission dynamics and hidden reservoirs limited the efficacy of public health interventions in Italy
Source: bioRxiv or medRxiv preprint supplement (doi:10.1101/2020.12.16.20248355), 2020-12-19
Supplement: Supplementary file [file media-2.pdf]

| <b>Virus name</b>                          | <b>Accession ID</b> | <b>Collection date</b> |
|--------------------------------------------|---------------------|------------------------|
| hCoV-19/Chongqing/IVDC-CQ-001/2020         | EPI_ISL_408481      | 1/18/20                |
| hCoV-19/Germany/BW-ChVir-1577/2020         | EPI_ISL_412912      | 2/25/20                |
| hCoV-19/Brazil/SP-01/2020                  | EPI_ISL_412964      | 2/25/20                |
| hCoV-19/Mexico/CMX-InDRE-01/2020           | EPI_ISL_412972      | 2/27/20                |
| hCoV-19/Switzerland/ZH-UZH-1000477796/2020 | EPI_ISL_413022      | 2/29/20                |
| hCoV-19/Netherlands/Blaricum_1364780/2020  | EPI_ISL_413566      | 3/2/20                 |
| hCoV-19/Netherlands/Nootdorp_1364222/2020  | EPI_ISL_413579      | 3/3/20                 |
| hCoV-19/Netherlands/Rotterdam_1364740/2020 | EPI_ISL_413584      | 3/3/20                 |
| hCoV-19/Netherlands/Tilburg_1364286/2020   | EPI_ISL_413587      | 3/3/20                 |
| hCoV-19/Netherlands/Zeewolde_1365080/2020  | EPI_ISL_413591      | 3/2/20                 |
| hCoV-19/Finland/FIN03032020C/2020          | EPI_ISL_413604      | 3/3/20                 |
| hCoV-19/Portugal/CV62/2020                 | EPI_ISL_413647      | 3/1/20                 |
| hCoV-19/Switzerland/TI-SNRCI-29919486/2020 | EPI_ISL_413996      | 2/24/20                |
| hCoV-19/Switzerland/AG-SNRCI-29940361/2020 | EPI_ISL_413999      | 2/27/20                |
| hCoV-19/Brazil/SP-03/2020                  | EPI_ISL_414014      | 3/2/20                 |
| hCoV-19/Brazil/SP-06/2020                  | EPI_ISL_414015      | 2/29/20                |
| hCoV-19/Brazil/SP-05/2020                  | EPI_ISL_414016      | 2/29/20                |
| hCoV-19/Brazil/SP-04/2020                  | EPI_ISL_414017      | 3/4/20                 |
| hCoV-19/Switzerland/GE-SNRCI-29943121/2020 | EPI_ISL_414019      | 2/27/20                |
| hCoV-19/Switzerland/GE-SNRCI-29945373/2020 | EPI_ISL_414020      | 2/27/20                |
| hCoV-19/Netherlands/Gelderland_1/2020      | EPI_ISL_414423      | 3/2/20                 |
| hCoV-19/Netherlands/NoordHolland_1/2020    | EPI_ISL_414433      | 3/3/20                 |
| hCoV-19/Netherlands/Utrecht_5/2020         | EPI_ISL_414439      | 3/2/20                 |
| hCoV-19/Netherlands/Utrecht_11/2020        | EPI_ISL_414443      | 3/3/20                 |
| hCoV-19/Netherlands/ZuidHolland_10/2020    | EPI_ISL_414446      | 3/3/20                 |
| hCoV-19/France/HDF-1805/2020               | EPI_ISL_414628      | 3/2/20                 |
| hCoV-19/France/HDF-1871/2020               | EPI_ISL_414630      | 3/3/20                 |
| hCoV-19/France/GES-1973/2020               | EPI_ISL_414631      | 3/4/20                 |
| hCoV-19/Finland/FIN-508/2020               | EPI_ISL_414643      | 3/7/20                 |
| hCoV-19/Belgium/BC-03016/2020              | EPI_ISL_415157      | 3/1/20                 |
| hCoV-19/Netherlands/Gelderland_3/2020      | EPI_ISL_415463      | 3/9/20                 |
| hCoV-19/Netherlands/NA_7/2020              | EPI_ISL_415496      | 3/9/20                 |
| hCoV-19/Netherlands/NoordBrabant_45/2020   | EPI_ISL_415502      | 3/9/20                 |
| hCoV-19/Netherlands/NoordBrabant_58/2020   | EPI_ISL_415514      | 3/11/20                |
| hCoV-19/Netherlands/ZuidHolland_25/2020    | EPI_ISL_415529      | 3/9/20                 |
| hCoV-19/Netherlands/ZuidHolland_29/2020    | EPI_ISL_415533      | 3/9/20                 |
| hCoV-19/Denmark/SSI-101/2020               | EPI_ISL_415646      | 3/3/20                 |
| hCoV-19/Switzerland/BS-HUG-0914/2020       | EPI_ISL_415701      | 3/2/20                 |
| hCoV-19/Hangzhou/ZJU-01/2020               | EPI_ISL_415709      | 1/25/20                |
| hCoV-19/Hangzhou/ZJU-05/2020               | EPI_ISL_415711      | 1/22/20                |
| hCoV-19/Brazil/SP-07/2020                  | EPI_ISL_416028      | 3/3/20                 |
| hCoV-19/Brazil/SP-09/2020                  | EPI_ISL_416031      | 3/4/20                 |
| hCoV-19/Denmark/SSI-09/2020                | EPI_ISL_416141      | 3/3/20                 |
| hCoV-19/Australia/VIC03/2020               | EPI_ISL_416411      | 1/25/20                |

|                                       |                |         |
|---------------------------------------|----------------|---------|
| hCoV-19/Vietnam/39607/2020            | EPI_ISL_416428 | 3/7/20  |
| hCoV-19/Vietnam/CM295/2020            | EPI_ISL_416430 | 3/6/20  |
| hCoV-19/Vietnam/CM296/2020            | EPI_ISL_416431 | 3/6/20  |
| hCoV-19/Georgia/Tb-273/2020           | EPI_ISL_416479 | 3/5/20  |
| hCoV-19/Georgia/Tb-712/2020           | EPI_ISL_416481 | 3/16/20 |
| hCoV-19/France/NOR-N2223/2020         | EPI_ISL_416494 | 3/4/20  |
| hCoV-19/New Zealand/20VR0189/2020     | EPI_ISL_416519 | 3/2/20  |
| hCoV-19/USA/WA-UW138/2020             | EPI_ISL_416676 | 3/11/20 |
| hCoV-19/USA/CT-UW159/2020             | EPI_ISL_416697 | 3/13/20 |
| hCoV-19/England/SHEF-BFCDF/2020       | EPI_ISL_416732 | 3/3/20  |
| hCoV-19/Lithuania/ChVir1632/2020      | EPI_ISL_416741 | 2020-02 |
| hCoV-19/Czech Republic/ChVir1630/2020 | EPI_ISL_416742 | 2/29/20 |
| hCoV-19/USA/NY-NYUMC4/2020            | EPI_ISL_416832 | 3/16/20 |
| hCoV-19/Belgium/ULG-3000/2020         | EPI_ISL_417004 | 3/5/20  |
| hCoV-19/Spain/GA-ISCIH-201663/2020    | EPI_ISL_417007 | 3/7/20  |
| hCoV-19/Spain/MD-ISCIH-201442/2020    | EPI_ISL_417010 | 3/4/20  |
| hCoV-19/Australia/QLDID920/2020       | EPI_ISL_417032 | 3/11/20 |
| hCoV-19/South Africa/R03006/2020      | EPI_ISL_417186 | 3/7/20  |
| hCoV-19/England/20104007503/2020      | EPI_ISL_417227 | 3/3/20  |
| hCoV-19/England/20104013703/2020      | EPI_ISL_417235 | 3/2/20  |
| hCoV-19/England/20108006003/2020      | EPI_ISL_417252 | 3/5/20  |
| hCoV-19/England/20109050406/2020      | EPI_ISL_417265 | 3/8/20  |
| hCoV-19/England/20109052006/2020      | EPI_ISL_417272 | 3/6/20  |
| hCoV-19/England/20109097506/2020      | EPI_ISL_417293 | 3/8/20  |
| hCoV-19/England/20110058706/2020      | EPI_ISL_417311 | 3/9/20  |
| hCoV-19/USA/CT-UW213/2020             | EPI_ISL_417362 | 3/13/20 |
| hCoV-19/Belgium/DHWM-03041/2020       | EPI_ISL_417422 | 3/4/20  |
| hCoV-19/Belgium/KA-03042/2020         | EPI_ISL_417424 | 3/4/20  |
| hCoV-19/Belgium/VBK-03061/2020        | EPI_ISL_417425 | 3/6/20  |
| hCoV-19/Belgium/SQ-03043/2020         | EPI_ISL_417426 | 3/4/20  |
| hCoV-19/Belgium/MMJ-03034/2020        | EPI_ISL_417429 | 3/3/20  |
| hCoV-19/Germany/NW-HHU-19/2020        | EPI_ISL_417464 | 3/14/20 |
| hCoV-19/Iceland/184/2020              | EPI_ISL_417550 | 3/16/20 |
| hCoV-19/Iceland/236/2020              | EPI_ISL_417564 | 3/17/20 |
| hCoV-19/Iceland/241/2020              | EPI_ISL_417569 | 3/17/20 |
| hCoV-19/Iceland/300/2020              | EPI_ISL_417629 | 3/18/20 |
| hCoV-19/Iceland/37/2020               | EPI_ISL_417681 | 3/4/20  |
| hCoV-19/Iceland/111/2020              | EPI_ISL_417691 | 3/11/20 |
| hCoV-19/Iceland/103/2020              | EPI_ISL_417698 | 3/10/20 |
| hCoV-19/Iceland/207/2020              | EPI_ISL_417733 | 3/16/20 |
| hCoV-19/Iceland/22/2020               | EPI_ISL_417734 | 3/2/20  |
| hCoV-19/Iceland/183/2020              | EPI_ISL_417746 | 3/16/20 |
| hCoV-19/Iceland/159/2020              | EPI_ISL_417806 | 3/13/20 |
| hCoV-19/Iceland/19/2020               | EPI_ISL_417817 | 3/2/20  |
| hCoV-19/Iceland/210/2020              | EPI_ISL_417829 | 3/16/20 |

|                                    |                |         |
|------------------------------------|----------------|---------|
| hCoV-19/Iceland/214/2020           | EPI_ISL_417831 | 3/16/20 |
| hCoV-19/Iceland/53/2020            | EPI_ISL_417851 | 3/5/20  |
| hCoV-19/Iceland/78/2020            | EPI_ISL_417863 | 3/9/20  |
| hCoV-19/Iceland/83/2020            | EPI_ISL_417868 | 3/9/20  |
| hCoV-19/Spain/MD-HLP-H10-39/2020   | EPI_ISL_417963 | 3/12/20 |
| hCoV-19/Portugal/PT0001b/2020      | EPI_ISL_417986 | 3/3/20  |
| hCoV-19/Portugal/PT0008/2020       | EPI_ISL_417993 | 3/8/20  |
| hCoV-19/Portugal/PT0017/2020       | EPI_ISL_418002 | 3/11/20 |
| hCoV-19/Portugal/PT0033/2020       | EPI_ISL_418018 | 3/16/20 |
| hCoV-19/USA/CT-UW271/2020          | EPI_ISL_418056 | 3/13/20 |
| hCoV-19/Belgium/JL-03044/2020      | EPI_ISL_418270 | 3/4/20  |
| hCoV-19/Canada/ON-PHL-4088/2020    | EPI_ISL_418354 | 2020-03 |
| hCoV-19/Canada/ON-PHL-3536/2020    | EPI_ISL_418362 | 2020-03 |
| hCoV-19/Canada/ON-PHL-3695/2020    | EPI_ISL_418363 | 2020-03 |
| hCoV-19/Canada/ON-PHL-6922/2020    | EPI_ISL_418364 | 2020-03 |
| hCoV-19/Canada/ON-PHL-0977/2020    | EPI_ISL_418365 | 2020-03 |
| hCoV-19/Canada/ON-PHL-7513/2020    | EPI_ISL_418367 | 2020-03 |
| hCoV-19/France/ARA-10251/2020      | EPI_ISL_418426 | 3/17/20 |
| hCoV-19/Ireland/WW-NVRL-24052/2020 | EPI_ISL_418584 | 3/10/20 |
| hCoV-19/Belgium/ULG-9714/2020      | EPI_ISL_418655 | 3/22/20 |
| hCoV-19/England/20109047803/2020   | EPI_ISL_418667 | 3/7/20  |
| hCoV-19/Belgium/VDLH-030548-2/2020 | EPI_ISL_418797 | 3/5/20  |
| hCoV-19/Australia/QLDID923/2020    | EPI_ISL_418801 | 3/14/20 |
| hCoV-19/Australia/QLDID924/2020    | EPI_ISL_418802 | 3/18/20 |
| hCoV-19/Spain/CT-HUVH-VH1133/2020  | EPI_ISL_418860 | 3/15/20 |
| hCoV-19/USA/WA-UW322/2020          | EPI_ISL_418889 | 3/16/20 |
| hCoV-19/Belgium/VRAR-030643/2020   | EPI_ISL_418981 | 3/6/20  |
| hCoV-19/France/ARA-12217/2020      | EPI_ISL_419178 | 3/22/20 |
| hCoV-19/Spain/CN-ISCI-201495/2020  | EPI_ISL_419233 | 3/4/20  |
| hCoV-19/Japan/P4-1/2020            | EPI_ISL_419301 | 3/11/20 |
| hCoV-19/Japan/P4-2/2020            | EPI_ISL_419302 | 3/12/20 |
| hCoV-19/Japan/P4-3/2020            | EPI_ISL_419303 | 3/12/20 |
| hCoV-19/Japan/P4-4/2020            | EPI_ISL_419304 | 3/17/20 |
| hCoV-19/Japan/P4-5/2020            | EPI_ISL_419305 | 3/18/20 |
| hCoV-19/Japan/P5-2/2020            | EPI_ISL_419310 | 3/13/20 |
| hCoV-19/Wales/PHWC-246B9/2020      | EPI_ISL_419440 | 3/17/20 |
| hCoV-19/USA/GA_2742/2020           | EPI_ISL_419557 | 2/29/20 |
| hCoV-19/Luxembourg/LNS3156434/2020 | EPI_ISL_419582 | 3/13/20 |
| hCoV-19/Luxembourg/LNS4836560/2020 | EPI_ISL_419588 | 3/16/20 |
| hCoV-19/Belarus/ChVir2073/2020     | EPI_ISL_419693 | 2020-03 |
| hCoV-19/Australia/VIC109/2020      | EPI_ISL_419718 | 3/18/20 |
| hCoV-19/Australia/VIC114/2020      | EPI_ISL_419725 | 3/20/20 |
| hCoV-19/Australia/VIC44/2020       | EPI_ISL_419767 | 3/11/20 |
| hCoV-19/Australia/VIC54/2020       | EPI_ISL_419770 | 3/12/20 |
| hCoV-19/Australia/VIC62/2020       | EPI_ISL_419774 | 3/13/20 |

|                                          |                |         |
|------------------------------------------|----------------|---------|
| hCoV-19/Australia/VIC45/2020             | EPI_ISL_419802 | 3/11/20 |
| hCoV-19/Australia/VIC92/2020             | EPI_ISL_419809 | 3/15/20 |
| hCoV-19/Australia/VIC136/2020            | EPI_ISL_419829 | 3/22/20 |
| hCoV-19/Australia/VIC141/2020            | EPI_ISL_419838 | 3/16/20 |
| hCoV-19/Australia/VIC156/2020            | EPI_ISL_419853 | 3/17/20 |
| hCoV-19/Australia/VIC174/2020            | EPI_ISL_419871 | 3/18/20 |
| hCoV-19/Australia/VIC190/2020            | EPI_ISL_419886 | 3/19/20 |
| hCoV-19/Australia/VIC192/2020            | EPI_ISL_419888 | 3/19/20 |
| hCoV-19/Australia/VIC198/2020            | EPI_ISL_419894 | 3/19/20 |
| hCoV-19/Australia/VIC219/2020            | EPI_ISL_419914 | 3/20/20 |
| hCoV-19/Australia/VIC238/2020            | EPI_ISL_419933 | 3/21/20 |
| hCoV-19/Australia/VIC250/2020            | EPI_ISL_419945 | 3/21/20 |
| hCoV-19/Australia/VIC309/2020            | EPI_ISL_420000 | 3/23/20 |
| hCoV-19/Australia/VIC310/2020            | EPI_ISL_420001 | 3/23/20 |
| hCoV-19/Australia/VIC311/2020            | EPI_ISL_420002 | 3/23/20 |
| hCoV-19/France/IDF-2792/2020             | EPI_ISL_420043 | 3/18/20 |
| hCoV-19/France/IDF-3163/2020             | EPI_ISL_420058 | 3/20/20 |
| hCoV-19/Russia/StPetersburg-RII3992/2020 | EPI_ISL_420080 | 3/18/20 |
| hCoV-19/Georgia/Tb-1679/2020             | EPI_ISL_420144 | 4/1/20  |
| hCoV-19/Norway/1955/2020                 | EPI_ISL_420146 | 3/11/20 |
| hCoV-19/England/SHEF-C0251/2020          | EPI_ISL_420196 | 3/28/20 |
| hCoV-19/England/SHEF-C01EB/2020          | EPI_ISL_420254 | 3/25/20 |
| hCoV-19/USA/AK-PHL006/2020               | EPI_ISL_420305 | 3/16/20 |
| hCoV-19/USA/NY-NYUMC54/2020              | EPI_ISL_420309 | 3/19/20 |
| hCoV-19/Belgium/WAM-030676/2020          | EPI_ISL_420332 | 3/6/20  |
| hCoV-19/Belgium/CD-030679/2020           | EPI_ISL_420335 | 3/6/20  |
| hCoV-19/Belgium/PAN-030681/2020          | EPI_ISL_420337 | 3/5/20  |
| hCoV-19/Belgium/LM-030685/2020           | EPI_ISL_420341 | 3/6/20  |
| hCoV-19/Belgium/MC-030689/2020           | EPI_ISL_420345 | 3/6/20  |
| hCoV-19/Belgium/VMC-030695/2020          | EPI_ISL_420351 | 3/6/20  |
| hCoV-19/Belgium/NMA-0324169/2020         | EPI_ISL_420426 | 3/24/20 |
| hCoV-19/USA/NY-NYUMC69/2020              | EPI_ISL_420585 | 3/18/20 |
| hCoV-19/USA/NY-NYUMC71/2020              | EPI_ISL_420587 | 3/18/20 |
| hCoV-19/Argentina/C121/2020              | EPI_ISL_420600 | 3/7/20  |
| hCoV-19/England/20136085404/2020         | EPI_ISL_420636 | 3/24/20 |
| hCoV-19/England/20139057604/2020         | EPI_ISL_420721 | 3/28/20 |
| hCoV-19/England/20139057704/2020         | EPI_ISL_420722 | 3/28/20 |
| hCoV-19/England/20139060504/2020         | EPI_ISL_420733 | 3/28/20 |
| hCoV-19/England/20142062604/2020         | EPI_ISL_420774 | 3/28/20 |
| hCoV-19/USA/NH_0004/2020                 | EPI_ISL_420791 | 2/29/20 |
| hCoV-19/USA/NH_0008/2020                 | EPI_ISL_420792 | 3/2/20  |
| hCoV-19/Belgium/ULG-10014/2020           | EPI_ISL_421192 | 3/30/20 |
| hCoV-19/Hangzhou/HZCDC0167/2020          | EPI_ISL_421223 | 1/23/20 |
| hCoV-19/USA/NY-PV08123/2020              | EPI_ISL_421352 | 3/14/20 |
| hCoV-19/Portugal/PT0049/2020             | EPI_ISL_421452 | 3/18/20 |

|                                          |                |         |
|------------------------------------------|----------------|---------|
| hCoV-19/Portugal/PT0061/2020             | EPI_ISL_421464 | 3/17/20 |
| hCoV-19/Portugal/PT0076/2020             | EPI_ISL_421479 | 3/21/20 |
| hCoV-19/Portugal/PT0077/2020             | EPI_ISL_421480 | 3/21/20 |
| hCoV-19/Portugal/PT0088/2020             | EPI_ISL_421491 | 3/22/20 |
| hCoV-19/Portugal/PT0096/2020             | EPI_ISL_421499 | 3/24/20 |
| hCoV-19/USA/NY-NYUMC112/2020             | EPI_ISL_421724 | 3/18/20 |
| hCoV-19/Luxembourg/LNS2334563/2020       | EPI_ISL_421737 | 3/17/20 |
| hCoV-19/Luxembourg/LNS0814536/2020       | EPI_ISL_421754 | 3/17/20 |
| hCoV-19/Luxembourg/LNS2458673/2020       | EPI_ISL_421760 | 3/17/20 |
| hCoV-19/England/201361008/2020           | EPI_ISL_421785 | 3/25/20 |
| hCoV-19/England/201361022/2020           | EPI_ISL_421790 | 3/25/20 |
| hCoV-19/England/20139027904/2020         | EPI_ISL_421907 | 3/26/20 |
| hCoV-19/Wales/PHWC-26981/2020            | EPI_ISL_422023 | 3/30/20 |
| hCoV-19/Wales/PHWC-2672D/2020            | EPI_ISL_422027 | 3/27/20 |
| hCoV-19/Wales/PHWC-2663F/2020            | EPI_ISL_422037 | 3/27/20 |
| hCoV-19/Wales/PHWC-2621D/2020            | EPI_ISL_422038 | 3/26/20 |
| hCoV-19/Wales/PHWC-26918/2020            | EPI_ISL_422048 | 3/27/20 |
| hCoV-19/Wales/PHWC-26E37/2020            | EPI_ISL_422079 | 3/29/20 |
| hCoV-19/Wales/PHWC-25FAE/2020            | EPI_ISL_422085 | 3/25/20 |
| hCoV-19/Wales/PHWC-260D7/2020            | EPI_ISL_422110 | 3/25/20 |
| hCoV-19/Wales/PHWC-26417/2020            | EPI_ISL_422112 | 3/27/20 |
| hCoV-19/Wales/PHWC-25F9F/2020            | EPI_ISL_422118 | 3/25/20 |
| hCoV-19/Wales/PHWC-26FCB/2020            | EPI_ISL_422123 | 3/30/20 |
| hCoV-19/Kuwait/KU008/2020                | EPI_ISL_422427 | 3/16/20 |
| hCoV-19/USA/NY-PV09116/2020              | EPI_ISL_422492 | 3/19/20 |
| hCoV-19/Netherlands/ZuidHolland_102/2020 | EPI_ISL_422901 | 3/18/20 |
| hCoV-19/England/201360126/2020           | EPI_ISL_423218 | 3/25/20 |
| hCoV-19/England/20140066004/2020         | EPI_ISL_423398 | 3/29/20 |
| hCoV-19/England/20140070504/2020         | EPI_ISL_423408 | 3/30/20 |
| hCoV-19/England/20140072504/2020         | EPI_ISL_423418 | 3/28/20 |
| hCoV-19/England/20144006904/2020         | EPI_ISL_423496 | 3/30/20 |
| hCoV-19/England/20144013704/2020         | EPI_ISL_423508 | 3/31/20 |
| hCoV-19/England/20148043704/2020         | EPI_ISL_423591 | 4/2/20  |
| hCoV-19/England/20132032504/2020         | EPI_ISL_423771 | 3/24/20 |
| hCoV-19/England/20132081104/2020         | EPI_ISL_423809 | 3/24/20 |
| hCoV-19/England/20132100404/2020         | EPI_ISL_423834 | 3/23/20 |
| hCoV-19/England/20132105704/2020         | EPI_ISL_423839 | 3/23/20 |
| hCoV-19/England/20132108004/2020         | EPI_ISL_423847 | 3/23/20 |
| hCoV-19/India/UN-3118/2020               | EPI_ISL_424364 | 3/17/20 |
| hCoV-19/India/UN-3239/2020               | EPI_ISL_424365 | 3/17/20 |
| hCoV-19/Iceland/512/2020                 | EPI_ISL_424534 | 2020-03 |
| hCoV-19/Iceland/595/2020                 | EPI_ISL_424615 | 3/27/20 |
| hCoV-19/Iceland/597/2020                 | EPI_ISL_424617 | 3/28/20 |
| hCoV-19/Iceland/601/2020                 | EPI_ISL_424621 | 3/28/20 |
| hCoV-19/Belgium/ULG-10072/2020           | EPI_ISL_424631 | 4/3/20  |

|                                           |                |         |
|-------------------------------------------|----------------|---------|
| hCoV-19/Belgium/ULG-10082/2020            | EPI_ISL_424649 | 4/4/20  |
| hCoV-19/USA/NH_0033/2020                  | EPI_ISL_424877 | 3/6/20  |
| hCoV-19/USA/IA_6396/2020                  | EPI_ISL_424895 | 3/8/20  |
| hCoV-19/USA/IA_6401/2020                  | EPI_ISL_424897 | 3/8/20  |
| hCoV-19/USA/IA_6399/2020                  | EPI_ISL_424898 | 3/8/20  |
| hCoV-19/USA/IA_6390/2020                  | EPI_ISL_424900 | 3/7/20  |
| hCoV-19/USA/SC_3572/2020                  | EPI_ISL_424905 | 3/5/20  |
| hCoV-19/USA/NY-NYUMC126/2020              | EPI_ISL_424933 | 4/1/20  |
| hCoV-19/Belgium/UGent-25/2020             | EPI_ISL_425064 | 3/25/20 |
| hCoV-19/England/CAMB-737C7/2020           | EPI_ISL_425239 | 3/31/20 |
| hCoV-19/England/CAMB-7382E/2020           | EPI_ISL_425245 | 3/31/20 |
| hCoV-19/England/CAMB-7440B/2020           | EPI_ISL_425288 | 3/20/20 |
| hCoV-19/England/CAMB-74544/2020           | EPI_ISL_425304 | 3/28/20 |
| hCoV-19/England/CAMB-74D6A/2020           | EPI_ISL_425374 | 3/19/20 |
| hCoV-19/England/NOTT-10DF05/2020          | EPI_ISL_425468 | 3/12/20 |
| hCoV-19/England/NOTT-10E308/2020          | EPI_ISL_425527 | 3/19/20 |
| hCoV-19/USA/ID-UW-4461/2020               | EPI_ISL_426075 | 3/29/20 |
| hCoV-19/Czech Republic/Seq4/2020          | EPI_ISL_426357 | 3/18/20 |
| hCoV-19/Czech Republic/Seq6/2020          | EPI_ISL_426359 | 3/17/20 |
| hCoV-19/USA/AZ-TG268281/2020              | EPI_ISL_426503 | 3/17/20 |
| hCoV-19/USA/AZ-TG268657/2020              | EPI_ISL_426510 | 3/17/20 |
| hCoV-19/Taiwan/TSGH-03/2020               | EPI_ISL_426631 | 3/17/20 |
| hCoV-19/Australia/VIC334/2020             | EPI_ISL_426643 | 3/19/20 |
| hCoV-19/Australia/VIC348/2020             | EPI_ISL_426657 | 3/20/20 |
| hCoV-19/Australia/VIC356/2020             | EPI_ISL_426664 | 3/21/20 |
| hCoV-19/Australia/VIC380/2020             | EPI_ISL_426687 | 3/23/20 |
| hCoV-19/Australia/VIC387/2020             | EPI_ISL_426694 | 3/23/20 |
| hCoV-19/Australia/VIC398/2020             | EPI_ISL_426701 | 3/24/20 |
| hCoV-19/Czech Republic/IAB_17/2020        | EPI_ISL_426892 | 3/27/20 |
| hCoV-19/Czech Republic/IAB_18/2020        | EPI_ISL_426893 | 3/27/20 |
| hCoV-19/Czech Republic/IAB_21/2020        | EPI_ISL_426895 | 3/27/20 |
| hCoV-19/Australia/VIC638/2020             | EPI_ISL_426934 | 3/29/20 |
| hCoV-19/Australia/VIC652/2020             | EPI_ISL_426948 | 3/28/20 |
| hCoV-19/Australia/VIC682/2020             | EPI_ISL_426977 | 3/29/20 |
| hCoV-19/Australia/VIC843/2020             | EPI_ISL_427103 | 4/4/20  |
| hCoV-19/Australia/VIC853/2020             | EPI_ISL_427113 | 4/4/20  |
| hCoV-19/Australia/VIC860/2020             | EPI_ISL_427118 | 4/5/20  |
| hCoV-19/Russia/StPetersburg-RII4382V/2020 | EPI_ISL_427310 | 3/29/20 |
| hCoV-19/Russia/StPetersburg-RII4384V/2020 | EPI_ISL_427311 | 3/29/20 |
| hCoV-19/Russia/StPetersburg-RII4532V/2020 | EPI_ISL_427313 | 4/3/20  |
| hCoV-19/Russia/StPetersburg-RII4328S/2020 | EPI_ISL_427338 | 3/25/20 |
| hCoV-19/Russia/StPetersburg-RII4332S/2020 | EPI_ISL_427339 | 3/25/20 |
| hCoV-19/Taiwan/TSGH-05/2020               | EPI_ISL_427392 | 3/14/20 |
| hCoV-19/USA/WI-UW-151/2020                | EPI_ISL_427458 | 4/8/20  |
| hCoV-19/USA/NY-WCMP2D04P/2020             | EPI_ISL_427528 | 3/12/20 |

|                                        |                |         |
|----------------------------------------|----------------|---------|
| hCoV-19/USA/NY-WCMP12E01P/2020         | EPI_ISL_427606 | 3/16/20 |
| hCoV-19/France/IDF-2252/2020           | EPI_ISL_428356 | 3/11/20 |
| hCoV-19/Sri Lanka/COV53/2020           | EPI_ISL_428671 | 3/10/20 |
| hCoV-19/Spain/MD-H12-LP27-2548/2020    | EPI_ISL_428681 | 3/11/20 |
| hCoV-19/Spain/MD-H12-20/2020           | EPI_ISL_428684 | 3/27/20 |
| hCoV-19/Spain/MD-H12-23/2020           | EPI_ISL_428686 | 3/22/20 |
| hCoV-19/Spain/MD-H12-26/2020           | EPI_ISL_428689 | 3/26/20 |
| hCoV-19/Spain/MD-H12-33/2020           | EPI_ISL_428696 | 3/12/20 |
| hCoV-19/Singapore/49/2020              | EPI_ISL_428828 | 3/8/20  |
| hCoV-19/Russia/Moscow-351/2020         | EPI_ISL_428852 | 4/2/20  |
| hCoV-19/Russia/Moscow-62505/2020       | EPI_ISL_428860 | 3/11/20 |
| hCoV-19/Russia/Moscow-62506/2020       | EPI_ISL_428862 | 3/11/20 |
| hCoV-19/Russia/StPetersburg-64304/2020 | EPI_ISL_428868 | 3/13/20 |
| hCoV-19/Russia/Moscow_64405/2020       | EPI_ISL_428869 | 3/13/20 |
| hCoV-19/Russia/Moscow-71605/2020       | EPI_ISL_428872 | 3/19/20 |
| hCoV-19/Russia/Omsk-89001/2020         | EPI_ISL_428878 | 4/1/20  |
| hCoV-19/Russia/Samara-73406/2020       | EPI_ISL_428885 | 3/20/20 |
| hCoV-19/Russia/Buryatia-84506/2020     | EPI_ISL_428894 | 3/27/20 |
| hCoV-19/Russia/Vector_84801/2020       | EPI_ISL_428896 | 3/27/20 |
| hCoV-19/Russia/Primorskiy-79001/2020   | EPI_ISL_428903 | 3/22/20 |
| hCoV-19/Russia/Pskov-83602/2020        | EPI_ISL_428908 | 3/25/20 |
| hCoV-19/Russia/Buryatia-88903/2020     | EPI_ISL_428911 | 4/1/20  |
| hCoV-19/Russia/Buryatia-84508/2020     | EPI_ISL_428913 | 3/27/20 |
| hCoV-19/Russia/Buryatia-87104/2020     | EPI_ISL_428914 | 3/30/20 |
| hCoV-19/Russia/Sverdlovsk-82904/2020   | EPI_ISL_428915 | 3/25/20 |
| hCoV-19/Russia/Tatarstan-82208/2020    | EPI_ISL_428917 | 3/24/20 |
| hCoV-19/Russia/Buryatia-87106/2020     | EPI_ISL_428919 | 3/30/20 |
| hCoV-19/Russia/Buryatia-87105/2020     | EPI_ISL_428920 | 3/30/20 |
| hCoV-19/Luxembourg/LNS6326231/2020     | EPI_ISL_428960 | 4/2/20  |
| hCoV-19/USA/CA-CZB067/2020             | EPI_ISL_429029 | 3/28/20 |
| hCoV-19/USA/CA-CZB089/2020             | EPI_ISL_429050 | 3/28/20 |
| hCoV-19/Guangzhou/GZMU0019/2020        | EPI_ISL_429080 | 2/5/20  |
| hCoV-19/Guangzhou/GZMU0037/2020        | EPI_ISL_429089 | 2/8/20  |
| hCoV-19/Sweden/20-08148/2020           | EPI_ISL_429119 | 3/11/20 |
| hCoV-19/Sweden/20-08155/2020           | EPI_ISL_429122 | 3/11/20 |
| hCoV-19/Sweden/20-08169/2020           | EPI_ISL_429123 | 3/12/20 |
| hCoV-19/Sweden/20-08173/2020           | EPI_ISL_429125 | 3/12/20 |
| hCoV-19/Sweden/20-50087/2020           | EPI_ISL_429138 | 3/5/20  |
| hCoV-19/Sweden/20-50125/2020           | EPI_ISL_429140 | 3/6/20  |
| hCoV-19/Sweden/20-50312/2020           | EPI_ISL_429160 | 3/12/20 |
| hCoV-19/Switzerland/GE-HUG-8086/2020   | EPI_ISL_429213 | 3/16/20 |
| hCoV-19/Denmark/ALAB-HH15/2020         | EPI_ISL_429273 | 3/10/20 |
| hCoV-19/Denmark/ALAB-SSI109/2020       | EPI_ISL_429341 | 3/4/20  |
| hCoV-19/Denmark/ALAB-SSI168/2020       | EPI_ISL_429382 | 3/9/20  |
| hCoV-19/Denmark/ALAB-SSI216/2020       | EPI_ISL_429408 | 3/10/20 |

|                                           |                |         |
|-------------------------------------------|----------------|---------|
| hCoV-19/Denmark/ALAB-SSI263/2020          | EPI_ISL_429425 | 3/10/20 |
| hCoV-19/Denmark/ALAB-SSI412/2020          | EPI_ISL_429507 | 3/10/20 |
| hCoV-19/Denmark/ALAB-SSI469/2020          | EPI_ISL_429549 | 3/25/20 |
| hCoV-19/Luxembourg/LNS9455951/2020        | EPI_ISL_429759 | 3/24/20 |
| hCoV-19/Luxembourg/LNS2580723/2020        | EPI_ISL_429778 | 3/22/20 |
| hCoV-19/Russia/StPetersburg-RII4936S/2020 | EPI_ISL_430071 | 4/8/20  |
| hCoV-19/Russia/StPetersburg-RII4944S/2020 | EPI_ISL_430074 | 4/8/20  |
| hCoV-19/Russia/StPetersburg-RII4949S/2020 | EPI_ISL_430075 | 4/9/20  |
| hCoV-19/Russia/StPetersburg-RII5942S/2020 | EPI_ISL_430099 | 4/13/20 |
| hCoV-19/Russia/StPetersburg-RII6027S/2020 | EPI_ISL_430100 | 4/14/20 |
| hCoV-19/Russia/StPetersburg-RII6031S/2020 | EPI_ISL_430101 | 4/14/20 |
| hCoV-19/Russia/StPetersburg-RII6065S/2020 | EPI_ISL_430110 | 4/15/20 |
| hCoV-19/Russia/Ulan-Ude-RII4562V/2020     | EPI_ISL_430112 | 3/25/20 |
| hCoV-19/USA/WA-S282/2020                  | EPI_ISL_430136 | 3/10/20 |
| hCoV-19/Greece/127_HPI/2020               | EPI_ISL_430469 | 2/29/20 |
| hCoV-19/Argentina/PAIS-A0007/2020         | EPI_ISL_430799 | 3/30/20 |
| hCoV-19/Argentina/PAIS-A0008/2020         | EPI_ISL_430800 | 3/30/20 |
| hCoV-19/Argentina/PAIS-A0009/2020         | EPI_ISL_430801 | 3/31/20 |
| hCoV-19/Argentina/PAIS-A0013/2020         | EPI_ISL_430804 | 4/1/20  |
| hCoV-19/Sweden/20-08171/2020              | EPI_ISL_430854 | 3/12/20 |
| hCoV-19/Sweden/20-50185/2020              | EPI_ISL_430862 | 3/8/20  |
| hCoV-19/India/TG-GMC-KN318/2020           | EPI_ISL_431102 | 3/11/20 |
| hCoV-19/India/TG-GMC-TC469/2020           | EPI_ISL_431117 | 3/20/20 |
| hCoV-19/Wales/PHWC-27786/2020             | EPI_ISL_432224 | 3/31/20 |
| hCoV-19/Wales/PHWC-27AAB/2020             | EPI_ISL_432227 | 3/30/20 |
| hCoV-19/Wales/PHWC-27C1E/2020             | EPI_ISL_432238 | 3/31/20 |
| hCoV-19/Wales/PHWC-29D55/2020             | EPI_ISL_432244 | 4/4/20  |
| hCoV-19/Wales/PHWC-2B1FD/2020             | EPI_ISL_432246 | 4/8/20  |
| hCoV-19/Wales/PHWC-29E07/2020             | EPI_ISL_432267 | 4/4/20  |
| hCoV-19/Wales/PHWC-2B04B/2020             | EPI_ISL_432271 | 4/8/20  |
| hCoV-19/Wales/PHWC-27285/2020             | EPI_ISL_432277 | 3/31/20 |
| hCoV-19/Wales/PHWC-27267/2020             | EPI_ISL_432307 | 3/31/20 |
| hCoV-19/Scotland/EDB573/2020              | EPI_ISL_433200 | 4/1/20  |
| hCoV-19/Scotland/CVR1493/2020             | EPI_ISL_433600 | 4/3/20  |
| hCoV-19/England/CAMB-73C5F/2020           | EPI_ISL_433680 | 4/2/20  |
| hCoV-19/England/CAMB-73C7D/2020           | EPI_ISL_433681 | 4/2/20  |
| hCoV-19/England/CAMB-73CD7/2020           | EPI_ISL_433685 | 4/2/20  |
| hCoV-19/England/CAMB-78285/2020           | EPI_ISL_433709 | 4/4/20  |
| hCoV-19/England/CAMB-78ABA/2020           | EPI_ISL_433812 | 4/7/20  |
| hCoV-19/England/CAMB-7ABB5/2020           | EPI_ISL_433848 | 4/6/20  |
| hCoV-19/England/CAMB-7ADBF/2020           | EPI_ISL_433876 | 4/8/20  |
| hCoV-19/USA/WA-S373/2020                  | EPI_ISL_434133 | 3/28/20 |
| hCoV-19/Greece/37/2020                    | EPI_ISL_434458 | 3/20/20 |
| hCoV-19/Greece/46/2020                    | EPI_ISL_434463 | 3/23/20 |
| hCoV-19/Greece/44/2020                    | EPI_ISL_434465 | 3/23/20 |



|                                         |                |         |
|-----------------------------------------|----------------|---------|
| hCoV-19/Greece/155/2020                 | EPI_ISL_434470 | 3/19/20 |
| hCoV-19/Greece/139/2020                 | EPI_ISL_434472 | 3/12/20 |
| hCoV-19/Greece/137/2020                 | EPI_ISL_434474 | 3/11/20 |
| hCoV-19/Greece/135/2020                 | EPI_ISL_434476 | 3/10/20 |
| hCoV-19/Greece/143/2020                 | EPI_ISL_434477 | 3/16/20 |
| hCoV-19/Greece/142/2020                 | EPI_ISL_434478 | 3/14/20 |
| hCoV-19/Greece/138/2020                 | EPI_ISL_434479 | 3/11/20 |
| hCoV-19/Greece/156/2020                 | EPI_ISL_434482 | 3/16/20 |
| hCoV-19/Greece/148/2020                 | EPI_ISL_434484 | 3/9/20  |
| hCoV-19/Greece/151/2020                 | EPI_ISL_434486 | 3/13/20 |
| hCoV-19/Luxembourg/LNS9470500/2020      | EPI_ISL_434505 | 4/8/20  |
| hCoV-19/Puerto Rico/CDC-S6/2020         | EPI_ISL_434546 | 3/24/20 |
| hCoV-19/France/OCC-5/2020               | EPI_ISL_434620 | 2020-03 |
| hCoV-19/Sweden/20-05448/2020            | EPI_ISL_434643 | 3/10/20 |
| hCoV-19/Sweden/20-05469/2020            | EPI_ISL_434644 | 3/10/20 |
| hCoV-19/Sweden/20-05627/2020            | EPI_ISL_434645 | 3/13/20 |
| hCoV-19/Sweden/20-05856/2020            | EPI_ISL_434649 | 3/17/20 |
| hCoV-19/Sweden/20-06376/2020            | EPI_ISL_434653 | 3/24/20 |
| hCoV-19/Sweden/20-06468/2020            | EPI_ISL_434655 | 3/25/20 |
| hCoV-19/USA/TX-HMH019/2020              | EPI_ISL_434729 | 3/17/20 |
| hCoV-19/USA/TX-HMH078/2020              | EPI_ISL_434787 | 3/19/20 |
| hCoV-19/United Arab Emirates/L0881/2020 | EPI_ISL_435125 | 3/16/20 |
| hCoV-19/Vietnam/VNHN_022/2020           | EPI_ISL_435303 | 3/7/20  |
| hCoV-19/Vietnam/VNHN_026/2020           | EPI_ISL_435305 | 3/7/20  |
| hCoV-19/Vietnam/VNHN_0299/2020          | EPI_ISL_435308 | 3/9/20  |
| hCoV-19/Vietnam/VNHN_0419/2020          | EPI_ISL_435312 | 3/10/20 |
| hCoV-19/Hungary/SRC-00278w/2020         | EPI_ISL_435427 | 3/25/20 |
| hCoV-19/Hungary/SRC-03670w/2020         | EPI_ISL_435430 | 3/29/20 |
| hCoV-19/USA/NY-NYUMC428/2020            | EPI_ISL_435495 | 4/14/20 |
| hCoV-19/Spain/VC-FISABIO-132/2020       | EPI_ISL_436227 | 3/18/20 |
| hCoV-19/Spain/VC-FISABIO-143/2020       | EPI_ISL_436238 | 3/18/20 |
| hCoV-19/Spain/VC-FISABIO-173/2020       | EPI_ISL_436268 | 3/20/20 |
| hCoV-19/Spain/VC-FISABIO-196/2020       | EPI_ISL_436291 | 3/16/20 |
| hCoV-19/Spain/VC-FISABIO-221/2020       | EPI_ISL_436316 | 3/23/20 |
| hCoV-19/Spain/VC-FISABIO-276/2020       | EPI_ISL_436371 | 3/26/20 |
| hCoV-19/Spain/VC-FISABIO-296/2020       | EPI_ISL_436391 | 3/17/20 |
| hCoV-19/USA/PA-MGSC13-04/2020           | EPI_ISL_436468 | 3/26/20 |
| hCoV-19/USA/MI-MDHHS-SC20134/2020       | EPI_ISL_436852 | 3/24/20 |
| hCoV-19/USA/MI-MDHHS-SC20142/2020       | EPI_ISL_436855 | 3/24/20 |
| hCoV-19/USA/MI-MDHHS-SC20115/2020       | EPI_ISL_436886 | 3/25/20 |
| hCoV-19/USA/MI-MDHHS-SC20173/2020       | EPI_ISL_436889 | 3/17/20 |
| hCoV-19/Latvia/010/2020                 | EPI_ISL_437089 | 3/23/20 |
| hCoV-19/Latvia/011/2020                 | EPI_ISL_437090 | 3/24/20 |
| hCoV-19/Germany/BY-MVP-0015/2020        | EPI_ISL_437216 | 4/9/20  |
| hCoV-19/Germany/BY-MVP-0017/2020        | EPI_ISL_437218 | 3/12/20 |

|                                           |                |         |
|-------------------------------------------|----------------|---------|
| hCoV-19/Germany/BY-MVP-0033/2020          | EPI_ISL_437232 | 3/31/20 |
| hCoV-19/Germany/BY-MVP-0047/2020          | EPI_ISL_437246 | 3/11/20 |
| hCoV-19/Germany/BY-MVP-0050/2020          | EPI_ISL_437249 | 3/12/20 |
| hCoV-19/Germany/BY-MVP-0059/2020          | EPI_ISL_437258 | 3/20/20 |
| hCoV-19/Germany/BY-MVP-0060/2020          | EPI_ISL_437259 | 3/21/20 |
| hCoV-19/Germany/BY-MVP-0061/2020          | EPI_ISL_437260 | 3/22/20 |
| hCoV-19/Germany/BY-MVP-0082/2020          | EPI_ISL_437276 | 3/30/20 |
| hCoV-19/Germany/BY-MVP-0100/2020          | EPI_ISL_437291 | 4/6/20  |
| hCoV-19/Turkey/HSGM-302/2020              | EPI_ISL_437313 | 3/27/20 |
| hCoV-19/Saudi Arabia/KAUST-Jeddah60/2020  | EPI_ISL_437497 | 3/25/20 |
| hCoV-19/Czech Republic/NRL_2615/2020      | EPI_ISL_437519 | 3/16/20 |
| hCoV-19/Denmark/ALAB-SSI-1427/2020        | EPI_ISL_437654 | 4/4/20  |
| hCoV-19/Saudi Arabia/KAUST-Jeddah61/2020  | EPI_ISL_437754 | 3/30/20 |
| hCoV-19/Saudi Arabia/KAUST-Jeddah66/2020  | EPI_ISL_437755 | 3/30/20 |
| hCoV-19/Saudi Arabia/KAUST-Jeddah68/2020  | EPI_ISL_437756 | 3/30/20 |
| hCoV-19/USA/VA-DCLS-0158/2020             | EPI_ISL_437791 | 4/14/20 |
| hCoV-19/Greece/220_35357/2020             | EPI_ISL_437887 | 3/18/20 |
| hCoV-19/Greece/56_37161/2020              | EPI_ISL_437911 | 3/31/20 |
| hCoV-19/Austria/CeMM0100/2020             | EPI_ISL_437961 | 3/20/20 |
| hCoV-19/Austria/CeMM0189/2020             | EPI_ISL_438030 | 3/13/20 |
| hCoV-19/Austria/CeMM0206/2020             | EPI_ISL_438045 | 3/15/20 |
| hCoV-19/Austria/CeMM0209/2020             | EPI_ISL_438046 | 3/16/20 |
| hCoV-19/USA/WA-S605/2020                  | EPI_ISL_438158 | 4/18/20 |
| hCoV-19/USA/WA-S616/2020                  | EPI_ISL_438169 | 4/23/20 |
| hCoV-19/USA/WA-S639/2020                  | EPI_ISL_438192 | 4/16/20 |
| hCoV-19/Scotland/CVR337/2020              | EPI_ISL_439056 | 3/21/20 |
| hCoV-19/Scotland/EDB2666/2020             | EPI_ISL_439256 | 4/26/20 |
| hCoV-19/Scotland/EDB3865/2020             | EPI_ISL_439345 | 4/30/20 |
| hCoV-19/Scotland/EDB3887/2020             | EPI_ISL_439354 | 5/1/20  |
| hCoV-19/England/CAMB-71E4C/2020           | EPI_ISL_439602 | 3/29/20 |
| hCoV-19/England/LIVE-99A77/2020           | EPI_ISL_439791 | 4/13/20 |
| hCoV-19/England/LOND-D359E/2020           | EPI_ISL_440958 | 3/27/20 |
| hCoV-19/England/LOND-D3604/2020           | EPI_ISL_440964 | 4/2/20  |
| hCoV-19/England/LOND-D36D7/2020           | EPI_ISL_440975 | 3/31/20 |
| hCoV-19/England/LOND-D3938/2020           | EPI_ISL_441010 | 4/3/20  |
| hCoV-19/England/LOND-D3983/2020           | EPI_ISL_441015 | 4/3/20  |
| hCoV-19/England/LOND-D3A08/2020           | EPI_ISL_441022 | 4/6/20  |
| hCoV-19/England/LOND-D3E1B/2020           | EPI_ISL_441038 | 4/4/20  |
| hCoV-19/Northern Ireland/NIRE-101F7A/2020 | EPI_ISL_441360 | 3/23/20 |
| hCoV-19/Northern Ireland/NIRE-102094/2020 | EPI_ISL_441375 | 3/21/20 |
| hCoV-19/Northern Ireland/NIRE-1023D7/2020 | EPI_ISL_441410 | 3/10/20 |
| hCoV-19/Northern Ireland/NIRE-FB484/2020  | EPI_ISL_441428 | 3/18/20 |
| hCoV-19/Northern Ireland/NIRE-FB509/2020  | EPI_ISL_441436 | 3/17/20 |
| hCoV-19/England/SHEF-D077D/2020           | EPI_ISL_442472 | 4/11/20 |
| hCoV-19/Singapore/122/2020                | EPI_ISL_443214 | 3/18/20 |

|                                    |                |         |
|------------------------------------|----------------|---------|
| hCoV-19/Singapore/126/2020         | EPI_ISL_443218 | 3/20/20 |
| hCoV-19/France/BRE-5447/2020       | EPI_ISL_443280 | 4/1/20  |
| hCoV-19/England/CAMB-8430B/2020    | EPI_ISL_443489 | 4/16/20 |
| hCoV-19/England/LOND-D47D3/2020    | EPI_ISL_444155 | 4/13/20 |
| hCoV-19/England/LOND-D531A/2020    | EPI_ISL_444210 | 4/16/20 |
| hCoV-19/England/LOND-D5383/2020    | EPI_ISL_444214 | 4/15/20 |
| hCoV-19/India/GJ-GBRC50/2020       | EPI_ISL_444481 | 4/30/20 |
| hCoV-19/USA/NY-NYUMC518/2020       | EPI_ISL_444635 | 3/30/20 |
| hCoV-19/USA/NY-NYUMC539/2020       | EPI_ISL_444656 | 3/30/20 |
| hCoV-19/USA/NY-NYUMC623/2020       | EPI_ISL_444740 | 4/2/20  |
| hCoV-19/Denmark/ALAB-SSI-1388/2020 | EPI_ISL_444854 | 4/3/20  |
| hCoV-19/Spain/CT-HUVH-VH5081/2020  | EPI_ISL_444981 | 3/21/20 |
| hCoV-19/Spain/CT-HUVH-VH5994/2020  | EPI_ISL_444983 | 3/22/20 |
| hCoV-19/Spain/CT-HUVH-VH8938/2020  | EPI_ISL_444986 | 3/26/20 |
| hCoV-19/Sweden/20-07237/2020       | EPI_ISL_445231 | 4/13/20 |
| hCoV-19/Chile/LL-ISPCH-1/2020      | EPI_ISL_445246 | 3/5/20  |
| hCoV-19/Chile/RM-ISPCH-7/2020      | EPI_ISL_445250 | 3/9/20  |
| hCoV-19/Chile/RM-ISPCH-22/2020     | EPI_ISL_445265 | 3/11/20 |
| hCoV-19/Chile/MA-ISPCH-1/2020      | EPI_ISL_445268 | 3/14/20 |
| hCoV-19/Chile/RM-ISPCH-23/2020     | EPI_ISL_445302 | 3/21/20 |
| hCoV-19/Chile/RM-ISPCH-30/2020     | EPI_ISL_445309 | 3/16/20 |
| hCoV-19/Chile/RM-ISPCH-38/2020     | EPI_ISL_445317 | 3/17/20 |
| hCoV-19/Chile/RM-ISPCH-40/2020     | EPI_ISL_445319 | 3/17/20 |
| hCoV-19/Chile/RM-ISPCH-41/2020     | EPI_ISL_445320 | 3/17/20 |
| hCoV-19/Chile/RM-ISPCH-44/2020     | EPI_ISL_445323 | 3/16/20 |
| hCoV-19/Chile/RM-ISPCH-45/2020     | EPI_ISL_445324 | 3/19/20 |
| hCoV-19/Chile/RM-ISPCH-68/2020     | EPI_ISL_445364 | 3/17/20 |
| hCoV-19/Chile/RM-ISPCH-70/2020     | EPI_ISL_445366 | 3/21/20 |
| hCoV-19/Wales/PHWC-2A246/2020      | EPI_ISL_445541 | 4/5/20  |
| hCoV-19/Wales/PHWC-2A835/2020      | EPI_ISL_445625 | 4/7/20  |
| hCoV-19/Wales/PHWC-2B55B/2020      | EPI_ISL_445726 | 4/10/20 |
| hCoV-19/Wales/PHWC-2B5F1/2020      | EPI_ISL_445734 | 4/13/20 |
| hCoV-19/Wales/PHWC-2BDAE/2020      | EPI_ISL_445846 | 4/10/20 |
| hCoV-19/India/GJ-GBRC56b/2020      | EPI_ISL_447031 | 5/3/20  |
| hCoV-19/India/GJ-GBRC70/2020       | EPI_ISL_447047 | 4/29/20 |
| hCoV-19/Belgium/ULG-0186/2020      | EPI_ISL_447128 | 3/23/20 |
| hCoV-19/Spain/VC-FISABIO-584/2020  | EPI_ISL_447514 | 3/28/20 |
| hCoV-19/Spain/VC-FISABIO-597/2020  | EPI_ISL_447519 | 4/1/20  |
| hCoV-19/Spain/CT-HUVH-VH1449/2020  | EPI_ISL_447532 | 3/16/20 |
| hCoV-19/Spain/CT-HUVH-VH7663/2020  | EPI_ISL_447533 | 3/25/20 |
| hCoV-19/India/GJ-GBRC92/2020       | EPI_ISL_447554 | 4/26/20 |
| hCoV-19/Germany/HE-FFM3clin/2020   | EPI_ISL_447609 | 2020-02 |
| hCoV-19/Greece/203_33026/2020      | EPI_ISL_447636 | 3/13/20 |
| hCoV-19/Greece/206_33492/2020      | EPI_ISL_447638 | 3/13/20 |
| hCoV-19/Greece/207_33548/2020      | EPI_ISL_447639 | 3/14/20 |

|                                     |                |         |
|-------------------------------------|----------------|---------|
| hCoV-19/Greece/211_34005/2020       | EPI_ISL_447640 | 3/16/20 |
| hCoV-19/Greece/216_34732/2020       | EPI_ISL_447641 | 3/18/20 |
| hCoV-19/Greece/219_35198/2020       | EPI_ISL_447642 | 3/14/20 |
| hCoV-19/Greece/238_31927/2020       | EPI_ISL_447645 | 3/9/20  |
| hCoV-19/Greece/239_32178/2020       | EPI_ISL_447646 | 3/10/20 |
| hCoV-19/Greece/247_32207/2020       | EPI_ISL_447647 | 3/10/20 |
| hCoV-19/Greece/250_32267/2020       | EPI_ISL_447648 | 3/10/20 |
| hCoV-19/Greece/254_32422/2020       | EPI_ISL_447649 | 3/11/20 |
| hCoV-19/Greece/255_32525/2020       | EPI_ISL_447650 | 3/11/20 |
| hCoV-19/Greece/259_31928/2020       | EPI_ISL_447651 | 3/9/20  |
| hCoV-19/Greece/262_32443/2020       | EPI_ISL_447652 | 3/11/20 |
| hCoV-19/Greece/263_32477/2020       | EPI_ISL_447653 | 3/11/20 |
| hCoV-19/France/IDF-10007LJ/2020     | EPI_ISL_447725 | 2020-03 |
| hCoV-19/Colombia/MET-GVI-97769/2020 | EPI_ISL_447802 | 4/4/20  |
| hCoV-19/Greece/54_37163/2020        | EPI_ISL_447835 | 3/31/20 |
| hCoV-19/Norway/2200/2020            | EPI_ISL_447837 | 3/20/20 |
| hCoV-19/USA/DC-CDC-0019/2020        | EPI_ISL_447840 | 3/8/20  |
| hCoV-19/Scotland/CVR2971/2020       | EPI_ISL_448211 | 4/22/20 |
| hCoV-19/England/NORW-E888E/2020     | EPI_ISL_448242 | 4/12/20 |
| hCoV-19/England/NORW-E88E8/2020     | EPI_ISL_448248 | 4/11/20 |
| hCoV-19/England/OXON-AC437/2020     | EPI_ISL_448450 | 4/5/20  |
| hCoV-19/England/OXON-AC6D7/2020     | EPI_ISL_448476 | 4/5/20  |
| hCoV-19/England/OXON-AC73E/2020     | EPI_ISL_448480 | 4/5/20  |
| hCoV-19/England/OXON-ACA62/2020     | EPI_ISL_448505 | 4/6/20  |
| hCoV-19/England/OXON-ACAEA/2020     | EPI_ISL_448508 | 4/6/20  |
| hCoV-19/England/OXON-ACE2A/2020     | EPI_ISL_448540 | 4/6/20  |
| hCoV-19/England/OXON-ACE57/2020     | EPI_ISL_448541 | 4/5/20  |
| hCoV-19/England/OXON-AEF43/2020     | EPI_ISL_448797 | 4/7/20  |
| hCoV-19/England/OXON-AEFBC/2020     | EPI_ISL_448801 | 4/7/20  |
| hCoV-19/England/OXON-AEFF8/2020     | EPI_ISL_448804 | 4/7/20  |
| hCoV-19/England/OXON-AF09A/2020     | EPI_ISL_448808 | 4/7/20  |
| hCoV-19/England/NORW-E79E6/2020     | EPI_ISL_449087 | 5/5/20  |
| hCoV-19/England/NORW-E81DE/2020     | EPI_ISL_449121 | 4/8/20  |
| hCoV-19/England/NORW-E8280/2020     | EPI_ISL_449132 | 4/8/20  |
| hCoV-19/England/NORW-E82CC/2020     | EPI_ISL_449136 | 4/8/20  |
| hCoV-19/England/NORW-E850F/2020     | EPI_ISL_449157 | 4/17/20 |
| hCoV-19/England/LOND-D3C3F/2020     | EPI_ISL_449644 | 4/4/20  |
| hCoV-19/England/LOND-D3D96/2020     | EPI_ISL_449651 | 4/4/20  |
| hCoV-19/England/LOND-D520E/2020     | EPI_ISL_449689 | 4/15/20 |
| hCoV-19/England/LOND-D559C/2020     | EPI_ISL_449698 | 4/16/20 |
| hCoV-19/USA/UT-01578/2020           | EPI_ISL_449824 | 4/7/20  |
| hCoV-19/USA/UT-01581/2020           | EPI_ISL_449826 | 4/7/20  |
| hCoV-19/USA/WA-S720/2020            | EPI_ISL_449890 | 4/12/20 |
| hCoV-19/USA/WA-S766/2020            | EPI_ISL_449936 | 4/14/20 |
| hCoV-19/USA/WA-S767/2020            | EPI_ISL_449937 | 4/14/20 |

|                                           |                |         |
|-------------------------------------------|----------------|---------|
| hCoV-19/USA/WA-S773/2020                  | EPI_ISL_449943 | 4/14/20 |
| hCoV-19/USA/WA-S774/2020                  | EPI_ISL_449944 | 4/14/20 |
| hCoV-19/USA/WA-S775/2020                  | EPI_ISL_449945 | 4/14/20 |
| hCoV-19/USA/WA-S776/2020                  | EPI_ISL_449946 | 4/14/20 |
| hCoV-19/USA/WA-S777/2020                  | EPI_ISL_449947 | 4/14/20 |
| hCoV-19/USA/WA-S778/2020                  | EPI_ISL_449948 | 4/14/20 |
| hCoV-19/USA/WA-S779/2020                  | EPI_ISL_449949 | 4/14/20 |
| hCoV-19/USA/WA-S781/2020                  | EPI_ISL_449951 | 4/14/20 |
| hCoV-19/USA/NY-PV09436/2020               | EPI_ISL_450113 | 3/10/20 |
| hCoV-19/USA/NY-PV09451/2020               | EPI_ISL_450125 | 3/19/20 |
| hCoV-19/USA/NY-PV09481/2020               | EPI_ISL_450153 | 3/20/20 |
| hCoV-19/Thailand/Nonthaburi_2520/2020     | EPI_ISL_450197 | 3/14/20 |
| hCoV-19/Germany/BY-ChVir-1017/2020        | EPI_ISL_450209 | 1/30/20 |
| hCoV-19/Russia/StPetersburg-RII7039V/2020 | EPI_ISL_450247 | 4/16/20 |
| hCoV-19/Russia/StPetersburg-RII7488S/2020 | EPI_ISL_450253 | 4/20/20 |
| hCoV-19/Russia/StPetersburg-RII7545S/2020 | EPI_ISL_450257 | 4/20/20 |
| hCoV-19/Russia/StPetersburg-RII7581S/2020 | EPI_ISL_450261 | 4/21/20 |
| hCoV-19/Russia/StPetersburg-RII7594S/2020 | EPI_ISL_450262 | 4/21/20 |
| hCoV-19/Russia/StPetersburg-RII7603S/2020 | EPI_ISL_450263 | 4/21/20 |
| hCoV-19/Russia/StPetersburg-RII7656S/2020 | EPI_ISL_450264 | 4/20/20 |
| hCoV-19/Russia/StPetersburg-RII8425S/2020 | EPI_ISL_450285 | 4/22/20 |
| hCoV-19/Russia/StPetersburg-RII8890S/2020 | EPI_ISL_450289 | 4/23/20 |
| hCoV-19/India/MH-CCMB-NIV3/2020           | EPI_ISL_450323 | 3/27/20 |
| hCoV-19/Hong Kong/VM20009579/2020         | EPI_ISL_450404 | 3/16/20 |
| hCoV-19/Germany/HH-UMC-01/2020            | EPI_ISL_450413 | 3/19/20 |
| hCoV-19/USA/CA-CZB-1200/2020              | EPI_ISL_450449 | 3/25/20 |
| hCoV-19/Lithuania/ChVir2225/2020          | EPI_ISL_450496 | 2020-03 |
| hCoV-19/Lebanon/S4_761/2020               | EPI_ISL_450511 | 3/4/20  |
| hCoV-19/Sweden/20-07299/2020              | EPI_ISL_450813 | 4/14/20 |
| hCoV-19/Sweden/20-14094/2020              | EPI_ISL_450829 | 4/28/20 |
| hCoV-19/Australia/SAP111/2020             | EPI_ISL_451131 | 3/15/20 |
| hCoV-19/Uganda/UG015/2020                 | EPI_ISL_451197 | 4/27/20 |
| hCoV-19/Sichuan/SC-PHCC1-022/2020         | EPI_ISL_451345 | 1/24/20 |
| hCoV-19/Sichuan/SC-WCH-311/2020           | EPI_ISL_451381 | 1/27/20 |
| hCoV-19/Poland/PL_P10/2020                | EPI_ISL_451971 | 4/1/20  |
| hCoV-19/Poland/PL_P19/2020                | EPI_ISL_451980 | 4/2/20  |
| hCoV-19/Poland/PL_P20/2020                | EPI_ISL_451981 | 4/7/20  |
| hCoV-19/Denmark/ALAB-HH-99/2020           | EPI_ISL_452100 | 3/7/20  |
| hCoV-19/USA/MN-CDC-0103/2020              | EPI_ISL_452108 | 3/10/20 |
| hCoV-19/USA/VI-CDC-3661/2020              | EPI_ISL_452121 | 3/23/20 |
| hCoV-19/Mexico/CMX-InDRE-07/2020          | EPI_ISL_452139 | 2/28/20 |
| hCoV-19/Belgium/20A42/2020                | EPI_ISL_452140 | 4/3/20  |
| hCoV-19/Germany/HE-FFM3/2020              | EPI_ISL_452219 | 3/2/20  |
| hCoV-19/Sweden/20-07295/2020              | EPI_ISL_452235 | 4/15/20 |
| hCoV-19/Sweden/20-51160/2020              | EPI_ISL_452242 | 5/4/20  |

|                                           |                |         |
|-------------------------------------------|----------------|---------|
| hCoV-19/USA/MI-MDHHS-SC20415/2020         | EPI_ISL_452289 | 3/16/20 |
| hCoV-19/Spain/NC-IBV-001398/2020          | EPI_ISL_452503 | 3/18/20 |
| hCoV-19/Spain/PV-IBV-000918/2020          | EPI_ISL_452651 | 3/27/20 |
| hCoV-19/Spain/PV-IBV-000874/2020          | EPI_ISL_452683 | 3/25/20 |
| hCoV-19/Spain/PV-IBV-000873/2020          | EPI_ISL_452684 | 3/25/20 |
| hCoV-19/Scotland/EDB4024/2020             | EPI_ISL_453106 | 4/15/20 |
| hCoV-19/Northern Ireland/NIRE-101ED7/2020 | EPI_ISL_453476 | 3/24/20 |
| hCoV-19/Portugal/PT0244/2020              | EPI_ISL_453958 | 3/31/20 |
| hCoV-19/Portugal/PT0249/2020              | EPI_ISL_453963 | 4/2/20  |
| hCoV-19/Portugal/PT0252/2020              | EPI_ISL_453966 | 4/2/20  |
| hCoV-19/Portugal/PT0317/2020              | EPI_ISL_454033 | 3/15/20 |
| hCoV-19/Portugal/PT0325/2020              | EPI_ISL_454041 | 3/16/20 |
| hCoV-19/Portugal/PT0334/2020              | EPI_ISL_454050 | 3/18/20 |
| hCoV-19/Portugal/PT0348/2020              | EPI_ISL_454064 | 3/17/20 |
| hCoV-19/Portugal/PT0405/2020              | EPI_ISL_454129 | 3/20/20 |
| hCoV-19/Portugal/PT0407/2020              | EPI_ISL_454131 | 3/21/20 |
| hCoV-19/Portugal/PT0409/2020              | EPI_ISL_454133 | 3/21/20 |
| hCoV-19/Portugal/PT0413/2020              | EPI_ISL_454137 | 3/23/20 |
| hCoV-19/Portugal/PT0445/2020              | EPI_ISL_454169 | 3/26/20 |
| hCoV-19/Portugal/PT0478/2020              | EPI_ISL_454202 | 3/25/20 |
| hCoV-19/Portugal/PT0490/2020              | EPI_ISL_454214 | 4/28/20 |
| hCoV-19/Portugal/PT0491/2020              | EPI_ISL_454215 | 4/29/20 |
| hCoV-19/Portugal/PT0492/2020              | EPI_ISL_454216 | 4/29/20 |
| hCoV-19/Portugal/PT0493/2020              | EPI_ISL_454217 | 4/29/20 |
| hCoV-19/Portugal/PT0494/2020              | EPI_ISL_454218 | 4/29/20 |
| hCoV-19/Portugal/PT0496/2020              | EPI_ISL_454220 | 4/30/20 |
| hCoV-19/Portugal/PT0497/2020              | EPI_ISL_454221 | 5/1/20  |
| hCoV-19/Portugal/PT0504/2020              | EPI_ISL_454228 | 3/17/20 |
| hCoV-19/Portugal/PT0509/2020              | EPI_ISL_454233 | 3/19/20 |
| hCoV-19/Portugal/PT0510/2020              | EPI_ISL_454234 | 3/19/20 |
| hCoV-19/Portugal/PT0521/2020              | EPI_ISL_454245 | 3/23/20 |
| hCoV-19/Portugal/PT0522/2020              | EPI_ISL_454246 | 3/23/20 |
| hCoV-19/Portugal/PT0572/2020              | EPI_ISL_454295 | 3/26/20 |
| hCoV-19/Portugal/PT0609/2020              | EPI_ISL_454332 | 3/14/20 |
| hCoV-19/Portugal/PT0610/2020              | EPI_ISL_454333 | 3/14/20 |
| hCoV-19/Portugal/PT0611/2020              | EPI_ISL_454334 | 3/15/20 |
| hCoV-19/Sweden/20-08040/2020              | EPI_ISL_454436 | 3/7/20  |
| hCoV-19/Sweden/20-08043/2020              | EPI_ISL_454438 | 3/8/20  |
| hCoV-19/Sweden/20-08044/2020              | EPI_ISL_454439 | 3/9/20  |
| hCoV-19/Sweden/20-08131/2020              | EPI_ISL_454445 | 3/10/20 |
| hCoV-19/Sweden/20-08060/2020              | EPI_ISL_454447 | 3/3/20  |
| hCoV-19/Sweden/20-08076/2020              | EPI_ISL_454451 | 3/5/20  |
| hCoV-19/Sweden/20-08077/2020              | EPI_ISL_454452 | 3/5/20  |
| hCoV-19/Sweden/20-08078/2020              | EPI_ISL_454453 | 3/5/20  |
| hCoV-19/Sweden/20-08082/2020              | EPI_ISL_454456 | 3/5/20  |

|                                            |                |         |
|--------------------------------------------|----------------|---------|
| hCoV-19/Sweden/20-08085/2020               | EPI_ISL_454459 | 3/5/20  |
| hCoV-19/Sweden/20-08086/2020               | EPI_ISL_454460 | 3/5/20  |
| hCoV-19/Sweden/20-08088/2020               | EPI_ISL_454461 | 3/5/20  |
| hCoV-19/Sweden/20-08091/2020               | EPI_ISL_454463 | 3/20/20 |
| hCoV-19/Sweden/20-08102/2020               | EPI_ISL_454473 | 3/7/20  |
| hCoV-19/Sweden/20-08103/2020               | EPI_ISL_454474 | 3/7/20  |
| hCoV-19/Sweden/20-08104/2020               | EPI_ISL_454475 | 3/6/20  |
| hCoV-19/Sweden/20-08115/2020               | EPI_ISL_454486 | 3/9/20  |
| hCoV-19/Sweden/20-08116/2020               | EPI_ISL_454487 | 3/9/20  |
| hCoV-19/USA/CA-CZB-1174/2020               | EPI_ISL_454625 | 4/30/20 |
| hCoV-19/USA/CA-CZB-1186/2020               | EPI_ISL_454631 | 4/29/20 |
| hCoV-19/USA/CA-CZB-1279/2020               | EPI_ISL_454637 | 3/28/20 |
| hCoV-19/USA/VI-CDC-4022/2020               | EPI_ISL_454643 | 4/17/20 |
| hCoV-19/USA/VI-CDC-4371/2020               | EPI_ISL_454649 | 4/26/20 |
| hCoV-19/Netherlands/ZuidHolland_10004/2020 | EPI_ISL_454753 | 2/28/20 |
| hCoV-19/Netherlands/Utrecht_10044/2020     | EPI_ISL_454793 | 3/31/20 |
| hCoV-19/Sweden/20-50052/2020               | EPI_ISL_454868 | 3/2/20  |
| hCoV-19/Sweden/20-50053/2020               | EPI_ISL_454869 | 3/2/20  |
| hCoV-19/Sweden/20-50055/2020               | EPI_ISL_454870 | 3/3/20  |
| hCoV-19/Sweden/20-50088/2020               | EPI_ISL_454871 | 3/4/20  |
| hCoV-19/Sweden/20-50089/2020               | EPI_ISL_454872 | 3/3/20  |
| hCoV-19/Sweden/20-50090/2020               | EPI_ISL_454873 | 3/3/20  |
| hCoV-19/Sweden/20-50098/2020               | EPI_ISL_454877 | 3/4/20  |
| hCoV-19/Sweden/20-50101/2020               | EPI_ISL_454879 | 3/3/20  |
| hCoV-19/Sweden/20-50104/2020               | EPI_ISL_454880 | 3/3/20  |
| hCoV-19/Sweden/20-50107/2020               | EPI_ISL_454881 | 3/3/20  |
| hCoV-19/Sweden/20-50139/2020               | EPI_ISL_454883 | 3/4/20  |
| hCoV-19/Sweden/20-50222/2020               | EPI_ISL_454891 | 3/7/20  |
| hCoV-19/Wuhan/HB-WHCM-109/2020             | EPI_ISL_454992 | 2/27/20 |
| hCoV-19/Wuhan/HB-WHCM-113/2020             | EPI_ISL_454993 | 2/28/20 |
| hCoV-19/Netherlands/NA_320/2020            | EPI_ISL_455125 | 4/2/20  |
| hCoV-19/Spain/GA-ISCI-202076/2020          | EPI_ISL_455332 | 3/10/20 |
| hCoV-19/Spain/GA-ISCI-202230/2020          | EPI_ISL_455333 | 3/11/20 |
| hCoV-19/Poland/PL_P28/2020                 | EPI_ISL_455441 | 4/1/20  |
| hCoV-19/Poland/PL_P29/2020                 | EPI_ISL_455442 | 3/18/20 |
| hCoV-19/Poland/PL_P31/2020                 | EPI_ISL_455444 | 3/5/20  |
| hCoV-19/Poland/PL_P32/2020                 | EPI_ISL_455445 | 3/13/20 |
| hCoV-19/India/WB-S13/2020                  | EPI_ISL_455643 | 3/30/20 |
| hCoV-19/Changzhou/JS27/2020                | EPI_ISL_455680 | 1/26/20 |
| hCoV-19/Vietnam/VNHN_2406/2020             | EPI_ISL_455700 | 3/25/20 |
| hCoV-19/Vietnam/VNHN_3096/2020             | EPI_ISL_455702 | 3/27/20 |
| hCoV-19/Vietnam/VNHN_4851/2020             | EPI_ISL_455709 | 4/9/20  |
| hCoV-19/Vietnam/VNHN_301/2020              | EPI_ISL_455714 | 3/9/20  |
| hCoV-19/Sweden/20-08117/2020               | EPI_ISL_455847 | 3/9/20  |
| hCoV-19/Sweden/20-50094/2020               | EPI_ISL_455850 | 3/4/20  |

|                                     |                |         |
|-------------------------------------|----------------|---------|
| hCoV-19/Sweden/20-50095/2020        | EPI_ISL_455851 | 3/4/20  |
| hCoV-19/Sweden/20-50140/2020        | EPI_ISL_455856 | 3/4/20  |
| hCoV-19/Sweden/20-50141/2020        | EPI_ISL_455857 | 3/4/20  |
| hCoV-19/Sweden/20-50150/2020        | EPI_ISL_455860 | 3/5/20  |
| hCoV-19/Sweden/20-50201/2020        | EPI_ISL_455867 | 3/5/20  |
| hCoV-19/Sweden/20-50212/2020        | EPI_ISL_455871 | 3/6/20  |
| hCoV-19/Sweden/20-50217/2020        | EPI_ISL_455874 | 3/7/20  |
| hCoV-19/Sweden/20-50218/2020        | EPI_ISL_455875 | 3/6/20  |
| hCoV-19/Sweden/20-50219/2020        | EPI_ISL_455876 | 3/6/20  |
| hCoV-19/Sweden/20-50223/2020        | EPI_ISL_455878 | 3/8/20  |
| hCoV-19/Sweden/20-50229/2020        | EPI_ISL_455879 | 3/7/20  |
| hCoV-19/Sweden/20-50247/2020        | EPI_ISL_455887 | 3/8/20  |
| hCoV-19/Sweden/20-50251/2020        | EPI_ISL_455890 | 3/7/20  |
| hCoV-19/Sweden/20-50253/2020        | EPI_ISL_455891 | 3/8/20  |
| hCoV-19/Sweden/20-50254/2020        | EPI_ISL_455892 | 3/7/20  |
| hCoV-19/Sweden/20-50255/2020        | EPI_ISL_455893 | 3/7/20  |
| hCoV-19/Sweden/20-50256/2020        | EPI_ISL_455894 | 3/7/20  |
| hCoV-19/Sweden/20-50257/2020        | EPI_ISL_455895 | 3/8/20  |
| hCoV-19/Sweden/20-50259/2020        | EPI_ISL_455897 | 3/7/20  |
| hCoV-19/Sweden/20-50289/2020        | EPI_ISL_455901 | 3/10/20 |
| hCoV-19/Sweden/20-50270/2020        | EPI_ISL_455904 | 3/8/20  |
| hCoV-19/Sweden/20-50272/2020        | EPI_ISL_455905 | 3/9/20  |
| hCoV-19/Sweden/20-50274/2020        | EPI_ISL_455906 | 3/8/20  |
| hCoV-19/Sweden/20-50266/2020        | EPI_ISL_455907 | 3/6/20  |
| hCoV-19/USA/NY-NYUMC795/2020        | EPI_ISL_456031 | 3/26/20 |
| hCoV-19/USA/NY-NYUMC800/2020        | EPI_ISL_456036 | 3/27/20 |
| hCoV-19/Colombia/ANT-INS-82457/2020 | EPI_ISL_456146 | 3/20/20 |
| hCoV-19/New Zealand/20VR0712/2020   | EPI_ISL_456163 | 3/11/20 |
| hCoV-19/New Zealand/20VR1133/2020   | EPI_ISL_456194 | 3/20/20 |
| hCoV-19/New Zealand/20VR2485/2020   | EPI_ISL_456380 | 4/15/20 |
| hCoV-19/New Zealand/20VR2659/2020   | EPI_ISL_456388 | 4/25/20 |
| hCoV-19/Australia/VIC1360/2020      | EPI_ISL_456427 | 4/7/20  |
| hCoV-19/England/EXET-1350A7/2020    | EPI_ISL_457029 | 4/7/20  |
| hCoV-19/England/EXET-13563C/2020    | EPI_ISL_457079 | 4/9/20  |
| hCoV-19/England/EXET-1368EA/2020    | EPI_ISL_457239 | 4/26/20 |
| hCoV-19/England/LOND-D5945/2020     | EPI_ISL_457281 | 4/16/20 |
| hCoV-19/England/NORW-EBA67/2020     | EPI_ISL_457469 | 5/5/20  |
| hCoV-19/England/NORW-EBD7D/2020     | EPI_ISL_457506 | 5/6/20  |
| hCoV-19/England/NORW-EC899/2020     | EPI_ISL_457568 | 5/17/20 |
| hCoV-19/England/SHEF-C33D3/2020     | EPI_ISL_457598 | 3/19/20 |
| hCoV-19/England/SHEF-C65AD/2020     | EPI_ISL_457611 | 4/14/20 |
| hCoV-19/Estonia/ChVir4287/2020      | EPI_ISL_457727 | 2020-03 |
| hCoV-19/Estonia/ChVir4292/2020      | EPI_ISL_457729 | 2020-03 |
| hCoV-19/Taiwan/TSGH-36/2020         | EPI_ISL_457730 | 2/6/20  |
| hCoV-19/Oman/RESP-20-2523/2020      | EPI_ISL_457975 | 3/17/20 |



|                                               |                |         |
|-----------------------------------------------|----------------|---------|
| hCoV-19/Oman/RESP-20-3080/2020                | EPI_ISL_457979 | 3/18/20 |
| hCoV-19/Belgium/Rega-0328187/2020             | EPI_ISL_458157 | 3/28/20 |
| hCoV-19/USA/CA-SR0381/2020                    | EPI_ISL_458261 | 4/3/20  |
| hCoV-19/Morocco/6887/2020                     | EPI_ISL_459965 | 3/3/20  |
| hCoV-19/Morocco/6906/2020                     | EPI_ISL_459984 | 4/6/20  |
| hCoV-19/USA/MA-MGH-00205/2020                 | EPI_ISL_460471 | 3/27/20 |
| hCoV-19/Netherlands/Zeeland_34/2020           | EPI_ISL_461273 | 4/26/20 |
| hCoV-19/India/GJ-GBRC157a/2020                | EPI_ISL_461486 | 5/27/20 |
| hCoV-19/Belgium/LL-0331377/2020               | EPI_ISL_462231 | 3/31/20 |
| hCoV-19/Japan/TKY9810/2020                    | EPI_ISL_462440 | 2020-04 |
| hCoV-19/Bosnia and Herzegovina/ChVir7348/2020 | EPI_ISL_462455 | 3/20/20 |
| hCoV-19/Bosnia and Herzegovina/ChVir7349/2020 | EPI_ISL_462456 | 3/20/20 |
| hCoV-19/Bosnia and Herzegovina/ChVir7350/2020 | EPI_ISL_462457 | 3/20/20 |
| hCoV-19/Bosnia and Herzegovina/ChVir7353/2020 | EPI_ISL_462459 | 3/21/20 |
| hCoV-19/Bosnia and Herzegovina/ChVir7362/2020 | EPI_ISL_462465 | 3/25/20 |
| hCoV-19/Bosnia and Herzegovina/ChVir7367/2020 | EPI_ISL_462469 | 3/27/20 |
| hCoV-19/Nigeria/NG57752/2020                  | EPI_ISL_462992 | 2020-03 |
| hCoV-19/USA/WA-S913/2020                      | EPI_ISL_463403 | 4/27/20 |
| hCoV-19/USA/WA-S1206/2020                     | EPI_ISL_463696 | 5/6/20  |
| hCoV-19/USA/WA-S1208/2020                     | EPI_ISL_463698 | 5/7/20  |
| hCoV-19/Cyprus/001/2020                       | EPI_ISL_463741 | 3/11/20 |
| hCoV-19/Cyprus/005/2020                       | EPI_ISL_463745 | 4/1/20  |
| hCoV-19/Cyprus/006/2020                       | EPI_ISL_463746 | 4/11/20 |
| hCoV-19/Canada/ON_MU-S306/2020                | EPI_ISL_463979 | 3/28/20 |
| hCoV-19/South Africa/Tygerberg_34/2020        | EPI_ISL_464145 | 4/3/20  |
| hCoV-19/South Africa/Tygerberg_48/2020        | EPI_ISL_464157 | 4/8/20  |
| hCoV-19/Bangladesh/BCSIR-NILMRC-080/2020      | EPI_ISL_464162 | 6/1/20  |
| hCoV-19/England/20098017604/2020              | EPI_ISL_464195 | 2/26/20 |
| hCoV-19/England/201080059/2020                | EPI_ISL_464449 | 3/5/20  |
| hCoV-19/England/20118050804/2020              | EPI_ISL_464923 | 3/13/20 |
| hCoV-19/England/20118112104/2020              | EPI_ISL_464957 | 3/13/20 |
| hCoV-19/England/20119063404/2020              | EPI_ISL_465087 | 3/12/20 |
| hCoV-19/England/20170032104/2020              | EPI_ISL_465277 | 4/9/20  |
| hCoV-19/England/20172054604/2020              | EPI_ISL_465357 | 4/21/20 |
| hCoV-19/England/20192085601/2020              | EPI_ISL_465602 | 5/1/20  |
| hCoV-19/England/20194157001/2020              | EPI_ISL_465621 | 5/5/20  |
| hCoV-19/Canada/Qc-L00240642/2020              | EPI_ISL_465681 | 3/27/20 |
| hCoV-19/England/20186084504/2020              | EPI_ISL_465709 | 4/28/20 |
| hCoV-19/England/20140002404/2020              | EPI_ISL_465868 | 3/27/20 |
| hCoV-19/England/20140006904/2020              | EPI_ISL_465875 | 3/29/20 |
| hCoV-19/England/20142016604/2020              | EPI_ISL_465923 | 3/30/20 |
| hCoV-19/England/20144011304/2020              | EPI_ISL_465976 | 3/30/20 |
| hCoV-19/England/20144057404/2020              | EPI_ISL_466003 | 3/31/20 |
| hCoV-19/England/20149012004/2020              | EPI_ISL_466152 | 4/3/20  |
| hCoV-19/England/20149043704/2020              | EPI_ISL_466195 | 4/2/20  |

|                                          |                |         |
|------------------------------------------|----------------|---------|
| hCoV-19/England/20149054504/2020         | EPI_ISL_466217 | 4/4/20  |
| hCoV-19/England/20156004604/2020         | EPI_ISL_466293 | 4/8/20  |
| hCoV-19/England/201640252/2020           | EPI_ISL_466452 | 4/14/20 |
| hCoV-19/England/20166004704/2020         | EPI_ISL_466508 | 4/14/20 |
| hCoV-19/England/20168042704/2020         | EPI_ISL_466622 | 4/17/20 |
| hCoV-19/Bangladesh/BCSIR-NILMRC-076/2020 | EPI_ISL_466644 | 6/1/20  |
| hCoV-19/Canada/BC_04020783/2020          | EPI_ISL_466761 | 2020-04 |
| hCoV-19/Germany/BY-MVP-0247/2020         | EPI_ISL_466902 | 4/30/20 |
| hCoV-19/Spain/AN-IBV-002910/2020         | EPI_ISL_467062 | 3/18/20 |
| hCoV-19/Spain/CN-IBV-002603/2020         | EPI_ISL_467086 | 3/18/20 |
| hCoV-19/Spain/MD-IBV-003668/2020         | EPI_ISL_467209 | 4/1/20  |
| hCoV-19/Spain/MD-IBV-003646/2020         | EPI_ISL_467255 | 4/1/20  |
| hCoV-19/Spain/MD-IBV-003700/2020         | EPI_ISL_467259 | 4/2/20  |
| hCoV-19/Canada/BC_10592956/2020          | EPI_ISL_467315 | 2020-04 |
| hCoV-19/Canada/BC_12251717/2020          | EPI_ISL_467334 | 2020-04 |
| hCoV-19/USA/NY-NYUMC903/2020             | EPI_ISL_467396 | 4/26/20 |
| hCoV-19/South Africa/KRISP-0035/2020     | EPI_ISL_467441 | 3/27/20 |
| hCoV-19/South Africa/KRISP-0040/2020     | EPI_ISL_467442 | 3/27/20 |
| hCoV-19/South Africa/KRISP-0041/2020     | EPI_ISL_467443 | 3/25/20 |
| hCoV-19/South Africa/KRISP-0055/2020     | EPI_ISL_467444 | 3/24/20 |
| hCoV-19/South Africa/KRISP-0067/2020     | EPI_ISL_467451 | 4/3/20  |
| hCoV-19/South Africa/KRISP-0115/2020     | EPI_ISL_467468 | 4/4/20  |
| hCoV-19/South Africa/KRISP-0119/2020     | EPI_ISL_467471 | 4/1/20  |
| hCoV-19/South Africa/KRISP-0159/2020     | EPI_ISL_467509 | 6/1/20  |
| hCoV-19/Russia/CRIE139642/2020           | EPI_ISL_467775 | 3/29/20 |
| hCoV-19/USA/VA-DCLS-0399/2020            | EPI_ISL_467794 | 4/21/20 |
| hCoV-19/USA/VA-DCLS-0404/2020            | EPI_ISL_467799 | 4/22/20 |
| hCoV-19/USA/VA-DCLS-0409/2020            | EPI_ISL_467803 | 4/24/20 |
| hCoV-19/Australia/SAP112/2020            | EPI_ISL_468016 | 3/16/20 |
| hCoV-19/Romania/Bucuresti-4105/2020      | EPI_ISL_468134 | 3/21/20 |
| hCoV-19/Romania/Bucuresti-4284/2020      | EPI_ISL_468135 | 3/22/20 |
| hCoV-19/USA/CA-QDX-103/2020              | EPI_ISL_468561 | 3/13/20 |
| hCoV-19/USA/CA-QDX-86/2020               | EPI_ISL_468566 | 3/13/20 |
| hCoV-19/USA/IN-QDX-85/2020               | EPI_ISL_468575 | 3/12/20 |
| hCoV-19/USA/NY-QDX-106/2020              | EPI_ISL_468579 | 3/12/20 |
| hCoV-19/Japan/TKYE6938/2020              | EPI_ISL_468724 | 2020-02 |
| hCoV-19/Japan/TKYE63442/2020             | EPI_ISL_468725 | 2020-03 |
| hCoV-19/Spain/PV-IBV-2122/2020           | EPI_ISL_468899 | 4/11/20 |
| hCoV-19/Spain/PV-IBV-2166/2020           | EPI_ISL_468921 | 4/12/20 |
| hCoV-19/Spain/PV-IBV-2170/2020           | EPI_ISL_468948 | 4/12/20 |
| hCoV-19/Sweden/20-14318/2020             | EPI_ISL_469057 | 5/5/20  |
| hCoV-19/Sweden/20-14377/2020             | EPI_ISL_469058 | 5/7/20  |
| hCoV-19/Sweden/20-08130/2020             | EPI_ISL_469073 | 3/10/20 |
| hCoV-19/Sweden/20-08134/2020             | EPI_ISL_469074 | 3/9/20  |
| hCoV-19/Sweden/20-50120/2020             | EPI_ISL_469076 | 3/4/20  |

|                                          |                |         |
|------------------------------------------|----------------|---------|
| hCoV-19/Saudi Arabia/86327/2020          | EPI_ISL_469248 | 3/15/20 |
| hCoV-19/England/BRIS-12BDCB/2020         | EPI_ISL_469463 | 5/8/20  |
| hCoV-19/England/BRIS-1276B5/2020         | EPI_ISL_469636 | 4/2/20  |
| hCoV-19/England/BRIS-127178/2020         | EPI_ISL_469649 | 4/23/20 |
| hCoV-19/Scotland/GCVR-172053/2020        | EPI_ISL_470005 | 3/30/20 |
| hCoV-19/Australia/WA12/2020              | EPI_ISL_470830 | 3/31/20 |
| hCoV-19/Russia/Moscow_PMVL-2/2020        | EPI_ISL_470896 | 3/26/20 |
| hCoV-19/Russia/Moscow_PMVL-7/2020        | EPI_ISL_470900 | 3/20/20 |
| hCoV-19/USA/WI-WSLH-200086/2020          | EPI_ISL_471250 | 3/16/20 |
| hCoV-19/England/EXET-13710C/2020         | EPI_ISL_471950 | 4/20/20 |
| hCoV-19/Wales/PHWC-15CE37/2020           | EPI_ISL_472626 | 4/20/20 |
| hCoV-19/Wales/PHWC-15E275/2020           | EPI_ISL_472801 | 5/11/20 |
| hCoV-19/Wales/PHWC-15FFB9/2020           | EPI_ISL_472878 | 5/23/20 |
| hCoV-19/Wales/PHWC-162BDD/2020           | EPI_ISL_473176 | 5/19/20 |
| hCoV-19/Wales/PHWC-16336B/2020           | EPI_ISL_473283 | 5/2/20  |
| hCoV-19/Wales/PHWC-163A39/2020           | EPI_ISL_474030 | 5/10/20 |
| hCoV-19/Wales/PHWC-163ADF/2020           | EPI_ISL_474040 | 5/9/20  |
| hCoV-19/Wales/PHWC-164300/2020           | EPI_ISL_474159 | 5/7/20  |
| hCoV-19/Wales/PHWC-32700/2020            | EPI_ISL_474343 | 4/15/20 |
| hCoV-19/Spain/MC-IBV-002894/2020         | EPI_ISL_474934 | 3/18/20 |
| hCoV-19/Israel/CVL-n-6750/2020           | EPI_ISL_474959 | 4/9/20  |
| hCoV-19/Israel/CVL-n-6751/2020           | EPI_ISL_474960 | 3/15/20 |
| hCoV-19/Israel/CVL-n-5939/2020           | EPI_ISL_474965 | 3/15/20 |
| hCoV-19/Israel/CVL-n-6735/2020           | EPI_ISL_474977 | 4/9/20  |
| hCoV-19/Israel/CVL-n-11594/2020          | EPI_ISL_475017 | 4/25/20 |
| hCoV-19/Bangladesh/BCSIR-NILMRC-103/2020 | EPI_ISL_475084 | 6/7/20  |
| hCoV-19/Sweden/20-08211/2020             | EPI_ISL_475094 | 3/16/20 |
| hCoV-19/Sweden/20-08311/2020             | EPI_ISL_475097 | 3/21/20 |
| hCoV-19/Sweden/20-08722/2020             | EPI_ISL_475116 | 3/31/20 |
| hCoV-19/Sweden/20-50556/2020             | EPI_ISL_475147 | 3/31/20 |
| hCoV-19/Sweden/20-08842/2020             | EPI_ISL_475156 | 4/9/20  |
| hCoV-19/Sweden/20-14518/2020             | EPI_ISL_475516 | 5/10/20 |
| hCoV-19/Sweden/20-06070/2020             | EPI_ISL_475536 | 3/20/20 |
| hCoV-19/Sweden/20-06523/2020             | EPI_ISL_475564 | 3/26/20 |
| hCoV-19/USA/CA-CSMC105/2020              | EPI_ISL_475580 | 4/2/20  |
| hCoV-19/USA/CA-CSMC23/2020               | EPI_ISL_475633 | 3/25/20 |
| hCoV-19/Spain/PV-HUD-70063452/2020       | EPI_ISL_475719 | 3/25/20 |
| hCoV-19/Austria/CeMM0563/2020            | EPI_ISL_475913 | 3/10/20 |
| hCoV-19/Morocco/refstage1/2020           | EPI_ISL_476559 | 2/27/20 |
| hCoV-19/India/GJ-GBRC230/2020            | EPI_ISL_476869 | 6/11/20 |
| hCoV-19/India/GJ-GBRC236/2020            | EPI_ISL_476878 | 6/12/20 |
| hCoV-19/USA/CT-UW-649/2020               | EPI_ISL_476914 | 3/12/20 |
| hCoV-19/USA/CT-UW-651/2020               | EPI_ISL_476916 | 3/13/20 |
| hCoV-19/USA/CT-UW-653/2020               | EPI_ISL_476918 | 3/13/20 |
| hCoV-19/USA/CT-UW-685/2020               | EPI_ISL_476931 | 3/12/20 |

|                                           |                |         |
|-------------------------------------------|----------------|---------|
| hCoV-19/Singapore/431nan/2020             | EPI_ISL_477172 | 3/18/20 |
| hCoV-19/USA/VA-DCLS-0427/2020             | EPI_ISL_477643 | 4/29/20 |
| hCoV-19/England/LOND-D6DDF/2020           | EPI_ISL_478435 | 4/2/20  |
| hCoV-19/England/OXON-AF407/2020           | EPI_ISL_478735 | 4/8/20  |
| hCoV-19/England/OXON-AF64D/2020           | EPI_ISL_478758 | 4/8/20  |
| hCoV-19/England/OXON-AF777/2020           | EPI_ISL_478769 | 4/14/20 |
| hCoV-19/England/OXON-AF7C2/2020           | EPI_ISL_478772 | 4/8/20  |
| hCoV-19/England/OXON-AF908/2020           | EPI_ISL_478784 | 4/8/20  |
| hCoV-19/England/OXON-AF9CC/2020           | EPI_ISL_478791 | 4/8/20  |
| hCoV-19/England/OXON-AFE90/2020           | EPI_ISL_478832 | 4/16/20 |
| hCoV-19/England/OXON-B060D/2020           | EPI_ISL_478891 | 4/17/20 |
| hCoV-19/England/OXON-B09C8/2020           | EPI_ISL_478927 | 4/10/20 |
| hCoV-19/England/OXON-B0ED8/2020           | EPI_ISL_478975 | 4/9/20  |
| hCoV-19/England/OXON-B16DF/2020           | EPI_ISL_479037 | 4/17/20 |
| hCoV-19/England/OXON-B1A2E/2020           | EPI_ISL_479064 | 4/23/20 |
| hCoV-19/England/OXON-B1E22/2020           | EPI_ISL_479095 | 4/21/20 |
| hCoV-19/England/OXON-B2137/2020           | EPI_ISL_479119 | 4/13/20 |
| hCoV-19/England/OXON-B21FB/2020           | EPI_ISL_479127 | 4/19/20 |
| hCoV-19/England/OXON-B2647/2020           | EPI_ISL_479162 | 4/2/20  |
| hCoV-19/Egypt/CUNCI-HGC4I034/2020         | EPI_ISL_479708 | 6/2/20  |
| hCoV-19/Japan/PG-0542/2020                | EPI_ISL_480198 | 3/30/20 |
| hCoV-19/Japan/PG-0543/2020                | EPI_ISL_480199 | 3/31/20 |
| hCoV-19/India/OR-ILSCV29215/2020          | EPI_ISL_481128 | 5/23/20 |
| hCoV-19/India/OR-ILSCV35457/2020          | EPI_ISL_481197 | 6/10/20 |
| hCoV-19/Ecuador/USFQ-065/2020             | EPI_ISL_481247 | 4/17/20 |
| hCoV-19/Finland/11A47S7/2020              | EPI_ISL_481535 | 4/11/20 |
| hCoV-19/Finland/15A602/2020               | EPI_ISL_481559 | 4/15/20 |
| hCoV-19/Canada/NB_261/2020                | EPI_ISL_481752 | 4/5/20  |
| hCoV-19/Northern Ireland/NIRE-103E7B/2020 | EPI_ISL_482041 | 4/8/20  |
| hCoV-19/Northern Ireland/NIRE-103E99/2020 | EPI_ISL_482052 | 4/8/20  |
| hCoV-19/England/HECH-2599EDA/2020         | EPI_ISL_482090 | 5/6/20  |
| hCoV-19/England/HECH-2599DBF/2020         | EPI_ISL_482104 | 5/6/20  |
| hCoV-19/USA/OR-PROV-004/2020              | EPI_ISL_482295 | 4/4/20  |
| hCoV-19/USA/OR-PROV-030/2020              | EPI_ISL_482313 | 3/23/20 |
| hCoV-19/USA/OR-PROV-032/2020              | EPI_ISL_482315 | 3/25/20 |
| hCoV-19/USA/OR-PROV-046/2020              | EPI_ISL_482328 | 3/23/20 |
| hCoV-19/USA/OR-PROV-074/2020              | EPI_ISL_482349 | 4/16/20 |
| hCoV-19/USA/OR-PROV-079/2020              | EPI_ISL_482352 | 4/17/20 |
| hCoV-19/USA/OR-PROV-080/2020              | EPI_ISL_482353 | 4/17/20 |
| hCoV-19/USA/OR-PROV-122/2020              | EPI_ISL_482386 | 4/27/20 |
| hCoV-19/USA/OR-PROV-130/2020              | EPI_ISL_482394 | 4/30/20 |
| hCoV-19/USA/OR-PROV-205/2020              | EPI_ISL_482447 | 4/18/20 |
| hCoV-19/Hangzhou/HZCDC7155/2020           | EPI_ISL_482581 | 3/21/20 |
| hCoV-19/Netherlands/Leiden-0001/2020      | EPI_ISL_482746 | 3/3/20  |
| hCoV-19/USA/MN-MDH-1268/2020              | EPI_ISL_482989 | 3/10/20 |

|                                           |                |         |
|-------------------------------------------|----------------|---------|
| hCoV-19/USA/MN-MDH-1277/2020              | EPI_ISL_482998 | 3/14/20 |
| hCoV-19/USA/MN-MDH-1290/2020              | EPI_ISL_483010 | 3/24/20 |
| hCoV-19/New Zealand/20CHL869065O/2020     | EPI_ISL_483060 | 3/21/20 |
| hCoV-19/Australia/SAP345/2020             | EPI_ISL_483121 | 3/23/20 |
| hCoV-19/USA/CA-ALSR-0470-SAN/2020         | EPI_ISL_483161 | 4/10/20 |
| hCoV-19/Bangladesh/BCSIR-NILMRC-196/2020  | EPI_ISL_483636 | 6/20/20 |
| hCoV-19/Israel/n14271/2020                | EPI_ISL_483717 | 3/18/20 |
| hCoV-19/India/GJ-GBRC266/2020             | EPI_ISL_483861 | 6/13/20 |
| hCoV-19/USA/WA-UW-3008/2020               | EPI_ISL_486076 | 3/27/20 |
| hCoV-19/Latvia/042/2020                   | EPI_ISL_486425 | 3/22/20 |
| hCoV-19/Switzerland/TI-ETHZ-110061/2020   | EPI_ISL_486491 | 4/1/20  |
| hCoV-19/Russia/CRIE159560/2020            | EPI_ISL_486815 | 3/30/20 |
| hCoV-19/Bahrain/110003611/2020            | EPI_ISL_487273 | 6/25/20 |
| hCoV-19/Bangladesh/BCSIR-NILMRC-226/2020  | EPI_ISL_487366 | 7/6/20  |
| hCoV-19/Scotland/EDB5554/2020             | EPI_ISL_487707 | 4/1/20  |
| hCoV-19/Scotland/EDB3439/2020             | EPI_ISL_487967 | 4/10/20 |
| hCoV-19/England/NORT-29D9DE/2020          | EPI_ISL_488076 | 5/7/20  |
| hCoV-19/England/BRIS-12F5B0/2020          | EPI_ISL_488244 | 3/3/20  |
| hCoV-19/England/BRIS-12FB63/2020          | EPI_ISL_488267 | 4/4/20  |
| hCoV-19/England/BRIS-12EE3E/2020          | EPI_ISL_488314 | 4/21/20 |
| hCoV-19/England/BRIS-12E618/2020          | EPI_ISL_488384 | 4/20/20 |
| hCoV-19/England/NORT-282C2E/2020          | EPI_ISL_488463 | 3/27/20 |
| hCoV-19/England/NORT-283294/2020          | EPI_ISL_488605 | 3/28/20 |
| hCoV-19/England/NORT-294BFF/2020          | EPI_ISL_488638 | 3/29/20 |
| hCoV-19/England/NORT-281C98/2020          | EPI_ISL_488802 | 3/23/20 |
| hCoV-19/England/WSFT-25C18EA/2020         | EPI_ISL_488863 | 4/24/20 |
| hCoV-19/Scotland/EDB2767/2020             | EPI_ISL_488905 | 3/29/20 |
| hCoV-19/Scotland/EDB3162/2020             | EPI_ISL_488967 | 4/6/20  |
| hCoV-19/Northern Ireland/NIRE-103CBD/2020 | EPI_ISL_489196 | 4/16/20 |
| hCoV-19/Northern Ireland/NIRE-1039A7/2020 | EPI_ISL_489201 | 4/16/20 |
| hCoV-19/Northern Ireland/NIRE-103549/2020 | EPI_ISL_489314 | 4/17/20 |
| hCoV-19/Bangladesh/BCSIR-NILMRC-246/2020  | EPI_ISL_490109 | 7/7/20  |
| hCoV-19/Bangladesh/BCSIR-NILMRC-247/2020  | EPI_ISL_490110 | 7/7/20  |
| hCoV-19/Bangladesh/BCSIR-NILMRC-249/2020  | EPI_ISL_490113 | 7/7/20  |
| hCoV-19/USA/ID-UW-3196/2020               | EPI_ISL_490992 | 3/26/20 |
| hCoV-19/Romania/ROSV_3962/2020            | EPI_ISL_491072 | 4/22/20 |
| hCoV-19/Romania/ROSV_569/2020             | EPI_ISL_491085 | 4/5/20  |
| hCoV-19/Czech Republic/NRL_5201/2020      | EPI_ISL_491117 | 3/18/20 |
| hCoV-19/Oman/6990/2020                    | EPI_ISL_491154 | 3/29/20 |
| hCoV-19/Costa Rica/INC-0044/2020          | EPI_ISL_491455 | 3/20/20 |
| hCoV-19/Brazil/RJ-UFRJ-1784/2020          | EPI_ISL_492037 | 4/29/20 |
| hCoV-19/Australia/SAP368/2020             | EPI_ISL_492133 | 3/19/20 |
| hCoV-19/England/BRIS-18545A9/2020         | EPI_ISL_492332 | 3/13/20 |
| hCoV-19/England/BRIS-12FCF7/2020          | EPI_ISL_492548 | 4/8/20  |
| hCoV-19/England/BRIS-12FF2B/2020          | EPI_ISL_492565 | 4/10/20 |

|                                          |                |         |
|------------------------------------------|----------------|---------|
| hCoV-19/England/BRIS-13083B/2020         | EPI_ISL_492571 | 4/12/20 |
| hCoV-19/England/BRIS-12FEC4/2020         | EPI_ISL_492640 | 4/10/20 |
| hCoV-19/England/BRIS-13084A/2020         | EPI_ISL_492654 | 4/12/20 |
| hCoV-19/England/BRIS-1305DA/2020         | EPI_ISL_492667 | 4/12/20 |
| hCoV-19/England/BRIS-130A62/2020         | EPI_ISL_492710 | 4/14/20 |
| hCoV-19/England/NORT-28B0FC/2020         | EPI_ISL_492916 | 4/17/20 |
| hCoV-19/England/NORT-28ACEA/2020         | EPI_ISL_492919 | 4/15/20 |
| hCoV-19/USA/MO-WUSTL042/2020             | EPI_ISL_493073 | 6/19/20 |
| hCoV-19/USA/MO-WUSTL043/2020             | EPI_ISL_493074 | 6/19/20 |
| hCoV-19/USA/MO-WUSTL050/2020             | EPI_ISL_493077 | 6/19/20 |
| hCoV-19/Wales/PHWC-167F63/2020           | EPI_ISL_494179 | 4/19/20 |
| hCoV-19/Wales/PHWC-168102/2020           | EPI_ISL_494203 | 4/19/20 |
| hCoV-19/Wales/PHWC-168B8C/2020           | EPI_ISL_494338 | 4/20/20 |
| hCoV-19/USA/CA-ALSR-1188/2020            | EPI_ISL_494424 | 4/28/20 |
| hCoV-19/USA/TX-QDX-190/2020              | EPI_ISL_494545 | 4/29/20 |
| hCoV-19/USA/CA-ALSR-1382/2020            | EPI_ISL_494573 | 3/12/20 |
| hCoV-19/USA/CA-ALSR-1587/2020            | EPI_ISL_494675 | 4/27/20 |
| hCoV-19/USA/CA-ALSR-1660/2020            | EPI_ISL_494721 | 3/20/20 |
| hCoV-19/Canada/LTRI-18/2020              | EPI_ISL_494970 | 3/20/20 |
| hCoV-19/India/GJ-GBRC315a/2020           | EPI_ISL_495071 | 6/17/20 |
| hCoV-19/India/GJ-GBRC318b/2020           | EPI_ISL_495076 | 6/17/20 |
| hCoV-19/USA/FL-BPHL-0449/2020            | EPI_ISL_495355 | 3/20/20 |
| hCoV-19/USA/WA-S1424/2020                | EPI_ISL_495874 | 5/19/20 |
| hCoV-19/USA/WA-S1425/2020                | EPI_ISL_495875 | 5/20/20 |
| hCoV-19/India/MH-NCCS-NR567/2020         | EPI_ISL_496536 | 5/7/20  |
| hCoV-19/USA/WA-S2416/2020                | EPI_ISL_497048 | 6/15/20 |
| hCoV-19/USA/WA-S1998/2020                | EPI_ISL_497426 | 6/4/20  |
| hCoV-19/Hong Kong/HKU-200723-078/2020    | EPI_ISL_497845 | 3/16/20 |
| hCoV-19/South Korea/KCDC2074/2020        | EPI_ISL_497975 | 2/21/20 |
| hCoV-19/South Korea/KCDC2130/2020        | EPI_ISL_498031 | 3/16/20 |
| hCoV-19/South Korea/KCDC2133/2020        | EPI_ISL_498034 | 3/20/20 |
| hCoV-19/South Korea/KCDC2134/2020        | EPI_ISL_498035 | 3/20/20 |
| hCoV-19/Bangladesh/BCSIR-NILMRC-263/2020 | EPI_ISL_498267 | 7/7/20  |
| hCoV-19/Bangladesh/BCSIR-NILMRC-307/2020 | EPI_ISL_498787 | 7/18/20 |
| hCoV-19/Wales/PHWC-1694AE/2020           | EPI_ISL_499447 | 4/1/20  |
| hCoV-19/England/LIVE-A61DC/2020          | EPI_ISL_499692 | 3/21/20 |
| hCoV-19/England/LIVE-A66FB/2020          | EPI_ISL_499734 | 3/16/20 |
| hCoV-19/England/LIVE-A695C/2020          | EPI_ISL_499757 | 3/16/20 |
| hCoV-19/England/LIVE-A6A59/2020          | EPI_ISL_499767 | 3/16/20 |
| hCoV-19/England/LIVE-A4D16/2020          | EPI_ISL_500084 | 3/12/20 |
| hCoV-19/England/LIVE-A4E13/2020          | EPI_ISL_500092 | 3/14/20 |
| hCoV-19/England/LIVE-A4FB6/2020          | EPI_ISL_500099 | 3/5/20  |
| hCoV-19/England/LIVE-A50D0/2020          | EPI_ISL_500106 | 3/4/20  |
| hCoV-19/England/LIVE-A510A/2020          | EPI_ISL_500108 | 3/14/20 |
| hCoV-19/Australia/NSW2176/2020           | EPI_ISL_500647 | 3/19/20 |

|                                            |                |         |
|--------------------------------------------|----------------|---------|
| hCoV-19/Australia/NSW2198/2020             | EPI_ISL_500659 | 3/20/20 |
| hCoV-19/Australia/NSW2226/2020             | EPI_ISL_500674 | 3/20/20 |
| hCoV-19/USA/VA-DCLS-0677/2020              | EPI_ISL_500840 | 4/18/20 |
| hCoV-19/USA/VA-DCLS-0680/2020              | EPI_ISL_500843 | 4/18/20 |
| hCoV-19/USA/VA-DCLS-0700/2020              | EPI_ISL_500856 | 4/18/20 |
| hCoV-19/England/BRIS-131032/2020           | EPI_ISL_501581 | 3/24/20 |
| hCoV-19/England/BRIS-130F90/2020           | EPI_ISL_501590 | 3/25/20 |
| hCoV-19/England/EKHU-260F014/2020          | EPI_ISL_501623 | 4/16/20 |
| hCoV-19/Bangladesh/BCSIR-NILMRC-284/2020   | EPI_ISL_504176 | 7/21/20 |
| hCoV-19/South Korea/KCDC2178/2020          | EPI_ISL_506972 | 3/24/20 |
| hCoV-19/South Korea/KCDC2186/2020          | EPI_ISL_506980 | 3/26/20 |
| hCoV-19/South Korea/KCDC2200/2020          | EPI_ISL_506994 | 4/8/20  |
| hCoV-19/Saudi Arabia/KAIMRC03/2020         | EPI_ISL_507012 | 3/11/20 |
| hCoV-19/Saudi Arabia/KAIMRC10/2020         | EPI_ISL_507016 | 3/15/20 |
| hCoV-19/Saudi Arabia/KAIMRC12/2020         | EPI_ISL_507018 | 3/17/20 |
| hCoV-19/Saudi Arabia/KAIMRC15/2020         | EPI_ISL_507020 | 3/19/20 |
| hCoV-19/Saudi Arabia/KAIMRC16/2020         | EPI_ISL_507021 | 3/20/20 |
| hCoV-19/Saudi Arabia/KAIMRC17/2020         | EPI_ISL_507022 | 3/21/20 |
| hCoV-19/Saudi Arabia/KFSHRC28/2020         | EPI_ISL_507033 | 3/24/20 |
| hCoV-19/Saudi Arabia/KFSHRC50/2020         | EPI_ISL_507038 | 3/29/20 |
| hCoV-19/England/LOND-124CD48/2020          | EPI_ISL_507041 | 4/24/20 |
| hCoV-19/England/LOND-124D15A/2020          | EPI_ISL_507058 | 3/22/20 |
| hCoV-19/England/LOND-124D178/2020          | EPI_ISL_507060 | 3/23/20 |
| hCoV-19/England/LOND-124D239/2020          | EPI_ISL_507070 | 3/25/20 |
| hCoV-19/England/LOND-124D2DF/2020          | EPI_ISL_507080 | 3/31/20 |
| hCoV-19/England/LOND-124D309/2020          | EPI_ISL_507083 | 4/8/20  |
| hCoV-19/England/LOND-124D3BE/2020          | EPI_ISL_507093 | 3/29/20 |
| hCoV-19/Russia/Novosibirsk-RII27321S/2020  | EPI_ISL_507214 | 5/7/20  |
| hCoV-19/Russia/Novy_Urengoy-RII24772S/2020 | EPI_ISL_507216 | 2020-05 |
| hCoV-19/Russia/Novy_Urengoy-RII24776S/2020 | EPI_ISL_507219 | 2020-05 |
| hCoV-19/Russia/Novy_Urengoy-RII24783S/2020 | EPI_ISL_507221 | 2020-05 |
| hCoV-19/Russia/Novy_Urengoy-RII24786S/2020 | EPI_ISL_507222 | 2020-05 |
| hCoV-19/Russia/Novy_Urengoy-RII24787S/2020 | EPI_ISL_507223 | 2020-05 |
| hCoV-19/Russia/StPetersburg-RII10066V/2020 | EPI_ISL_507224 | 4/29/20 |
| hCoV-19/Russia/StPetersburg-RII10219S/2020 | EPI_ISL_507227 | 4/24/20 |
| hCoV-19/Russia/StPetersburg-RII11144S/2020 | EPI_ISL_507233 | 5/3/20  |
| hCoV-19/Russia/StPetersburg-RII11151S/2020 | EPI_ISL_507236 | 4/30/20 |
| hCoV-19/Russia/StPetersburg-RII11168S/2020 | EPI_ISL_507240 | 5/2/20  |
| hCoV-19/Russia/StPetersburg-RII11250S/2020 | EPI_ISL_507246 | 4/30/20 |
| hCoV-19/Russia/StPetersburg-RII13532S/2020 | EPI_ISL_507256 | 5/10/20 |
| hCoV-19/Russia/StPetersburg-RII14691V/2020 | EPI_ISL_507258 | 5/13/20 |
| hCoV-19/Russia/StPetersburg-RII15065S/2020 | EPI_ISL_507259 | 5/14/20 |
| hCoV-19/Russia/StPetersburg-RII15229S/2020 | EPI_ISL_507263 | 5/12/20 |
| hCoV-19/Russia/StPetersburg-RII15671S/2020 | EPI_ISL_507269 | 5/15/20 |
| hCoV-19/Russia/StPetersburg-RII15674S/2020 | EPI_ISL_507271 | 5/15/20 |

|                                            |                |         |
|--------------------------------------------|----------------|---------|
| hCoV-19/Russia/StPetersburg-RII15950V/2020 | EPI_ISL_507276 | 5/18/20 |
| hCoV-19/Russia/StPetersburg-RII17574S/2020 | EPI_ISL_507279 | 5/26/20 |
| hCoV-19/Russia/StPetersburg-RII21769S/2020 | EPI_ISL_507288 | 6/6/20  |
| hCoV-19/Russia/StPetersburg-RII21797S/2020 | EPI_ISL_507289 | 6/7/20  |
| hCoV-19/USA/MN-MDH-1396/2020               | EPI_ISL_507983 | 3/28/20 |
| hCoV-19/Australia/SAP433/2020              | EPI_ISL_508124 | 3/18/20 |
| hCoV-19/Australia/SAP435/2020              | EPI_ISL_508126 | 3/22/20 |
| hCoV-19/India/WB-IK18/2020                 | EPI_ISL_508347 | 4/24/20 |
| hCoV-19/India/WB-IK2/2020                  | EPI_ISL_508349 | 3/30/20 |
| hCoV-19/India/WB-IK27/2020                 | EPI_ISL_508357 | 4/27/20 |
| hCoV-19/India/WB-IK4/2020                  | EPI_ISL_508368 | 3/31/20 |
| hCoV-19/India/WB-IK88/2020                 | EPI_ISL_508406 | 5/19/20 |
| hCoV-19/India/WB-IK9/2020                  | EPI_ISL_508407 | 4/13/20 |
| hCoV-19/USA/FL-BPHL-0562/2020              | EPI_ISL_508766 | 3/11/20 |
| hCoV-19/USA/FL-BPHL-0563/2020              | EPI_ISL_508767 | 3/11/20 |
| hCoV-19/France/ARA-23893/2020              | EPI_ISL_508929 | 4/11/20 |
| hCoV-19/France/ARA-18634/2020              | EPI_ISL_508972 | 4/2/20  |
| hCoV-19/France/ARA-22132/2020              | EPI_ISL_508997 | 4/8/20  |
| hCoV-19/South Africa/KRISP-K000622/2020    | EPI_ISL_509274 | 7/3/20  |
| hCoV-19/South Africa/KRISP-K001101/2020    | EPI_ISL_509350 | 7/10/20 |
| hCoV-19/Spain/AN-IBV-002017/2020           | EPI_ISL_509628 | 3/16/20 |
| hCoV-19/Spain/AN-IBV-002020/2020           | EPI_ISL_509630 | 3/16/20 |
| hCoV-19/Guatemala/CDC-1230/2020            | EPI_ISL_509697 | 3/15/20 |
| hCoV-19/Guatemala/CDC-1231/2020            | EPI_ISL_509698 | 3/15/20 |
| hCoV-19/USA/FL-BPHL-0702/2020              | EPI_ISL_509760 | 3/28/20 |
| hCoV-19/Spain/CT-IBV-003155/2020           | EPI_ISL_510252 | 3/16/20 |
| hCoV-19/Spain/CT-IBV-003160/2020           | EPI_ISL_510256 | 3/16/20 |
| hCoV-19/Spain/CT-IBV-003163/2020           | EPI_ISL_510259 | 3/16/20 |
| hCoV-19/Spain/GA-IBV-004029/2020           | EPI_ISL_510271 | 3/14/20 |
| hCoV-19/Spain/GA-IBV-004036/2020           | EPI_ISL_510275 | 3/14/20 |
| hCoV-19/Spain/GA-IBV-004054/2020           | EPI_ISL_510293 | 3/18/20 |
| hCoV-19/Spain/GA-IBV-004060/2020           | EPI_ISL_510298 | 3/18/20 |
| hCoV-19/Spain/GA-IBV-004062/2020           | EPI_ISL_510300 | 3/18/20 |
| hCoV-19/Spain/GA-IBV-004063/2020           | EPI_ISL_510301 | 3/18/20 |
| hCoV-19/Spain/PV-IBV-004181/2020           | EPI_ISL_510468 | 4/2/20  |
| hCoV-19/Spain/PV-IBV-004184/2020           | EPI_ISL_510471 | 4/2/20  |
| hCoV-19/Spain/PV-IBV-004225/2020           | EPI_ISL_510507 | 4/4/20  |
| hCoV-19/Spain/PV-IBV-004227/2020           | EPI_ISL_510509 | 4/4/20  |
| hCoV-19/Sweden/20-08909/2020               | EPI_ISL_510815 | 5/28/20 |
| hCoV-19/Sweden/20-50564/2020               | EPI_ISL_510818 | 3/30/20 |
| hCoV-19/Sweden/20-51277/2020               | EPI_ISL_510822 | 5/4/20  |
| hCoV-19/Portugal/PT0642/2020               | EPI_ISL_510903 | 3/29/20 |
| hCoV-19/Portugal/PT0697/2020               | EPI_ISL_510956 | 3/14/20 |
| hCoV-19/Portugal/PT0717/2020               | EPI_ISL_510976 | 3/25/20 |
| hCoV-19/Portugal/PT0777a/2020              | EPI_ISL_511036 | 3/20/20 |



|                              |                |         |
|------------------------------|----------------|---------|
| hCoV-19/Portugal/PT0780/2020 | EPI_ISL_511039 | 3/14/20 |
| hCoV-19/Portugal/PT0787/2020 | EPI_ISL_511046 | 3/17/20 |
| hCoV-19/Portugal/PT0798/2020 | EPI_ISL_511057 | 3/19/20 |
| hCoV-19/Portugal/PT0803/2020 | EPI_ISL_511062 | 3/19/20 |
| hCoV-19/Portugal/PT0807/2020 | EPI_ISL_511066 | 3/20/20 |
| hCoV-19/Portugal/PT0808/2020 | EPI_ISL_511067 | 3/20/20 |
| hCoV-19/Portugal/PT0810/2020 | EPI_ISL_511069 | 3/20/20 |
| hCoV-19/Portugal/PT0812/2020 | EPI_ISL_511071 | 3/20/20 |
| hCoV-19/Portugal/PT0813/2020 | EPI_ISL_511072 | 3/20/20 |
| hCoV-19/Portugal/PT0814/2020 | EPI_ISL_511073 | 3/20/20 |
| hCoV-19/Portugal/PT0815/2020 | EPI_ISL_511074 | 3/20/20 |
| hCoV-19/Portugal/PT0817/2020 | EPI_ISL_511076 | 3/20/20 |
| hCoV-19/Portugal/PT0821/2020 | EPI_ISL_511080 | 3/20/20 |
| hCoV-19/Portugal/PT0832/2020 | EPI_ISL_511091 | 3/21/20 |
| hCoV-19/Portugal/PT0833/2020 | EPI_ISL_511092 | 3/22/20 |
| hCoV-19/Portugal/PT0843/2020 | EPI_ISL_511102 | 3/22/20 |
| hCoV-19/Portugal/PT0903/2020 | EPI_ISL_511160 | 3/28/20 |
| hCoV-19/Portugal/PT0907/2020 | EPI_ISL_511164 | 3/28/20 |
| hCoV-19/Portugal/PT0929/2020 | EPI_ISL_511186 | 3/23/20 |
| hCoV-19/Portugal/PT1235/2020 | EPI_ISL_511196 | 3/31/20 |
| hCoV-19/Portugal/PT1239/2020 | EPI_ISL_511200 | 3/31/20 |
| hCoV-19/Portugal/PT1247/2020 | EPI_ISL_511208 | 3/31/20 |
| hCoV-19/Portugal/PT1250/2020 | EPI_ISL_511211 | 3/16/20 |
| hCoV-19/Portugal/PT1289/2020 | EPI_ISL_511250 | 3/24/20 |
| hCoV-19/Portugal/PT1308/2020 | EPI_ISL_511267 | 3/17/20 |
| hCoV-19/Portugal/PT1316/2020 | EPI_ISL_511275 | 3/17/20 |
| hCoV-19/Portugal/PT1325/2020 | EPI_ISL_511284 | 3/18/20 |
| hCoV-19/Portugal/PT1336/2020 | EPI_ISL_511295 | 3/18/20 |
| hCoV-19/Portugal/PT1337/2020 | EPI_ISL_511296 | 3/19/20 |
| hCoV-19/Portugal/PT1351/2020 | EPI_ISL_511310 | 3/25/20 |
| hCoV-19/Portugal/PT1388/2020 | EPI_ISL_511347 | 3/27/20 |
| hCoV-19/Portugal/PT1404/2020 | EPI_ISL_511363 | 3/24/20 |
| hCoV-19/Portugal/PT1410/2020 | EPI_ISL_511369 | 3/25/20 |
| hCoV-19/Portugal/PT1418/2020 | EPI_ISL_511377 | 3/26/20 |
| hCoV-19/Portugal/PT1423/2020 | EPI_ISL_511382 | 3/27/20 |
| hCoV-19/Portugal/PT1425/2020 | EPI_ISL_511384 | 3/27/20 |
| hCoV-19/Portugal/PT1427/2020 | EPI_ISL_511386 | 3/25/20 |
| hCoV-19/Portugal/PT1432/2020 | EPI_ISL_511391 | 3/26/20 |
| hCoV-19/Portugal/PT1434/2020 | EPI_ISL_511393 | 3/24/20 |
| hCoV-19/Portugal/PT1435/2020 | EPI_ISL_511394 | 3/26/20 |
| hCoV-19/Portugal/PT1438/2020 | EPI_ISL_511397 | 3/21/20 |
| hCoV-19/Portugal/PT1441/2020 | EPI_ISL_511400 | 3/24/20 |
| hCoV-19/Portugal/PT1442/2020 | EPI_ISL_511401 | 3/25/20 |
| hCoV-19/Portugal/PT1446/2020 | EPI_ISL_511405 | 3/26/20 |
| hCoV-19/Portugal/PT1448/2020 | EPI_ISL_511407 | 3/30/20 |

|                                           |                |         |
|-------------------------------------------|----------------|---------|
| hCoV-19/Portugal/PT1450/2020              | EPI_ISL_511409 | 3/27/20 |
| hCoV-19/Portugal/PT1452/2020              | EPI_ISL_511411 | 3/26/20 |
| hCoV-19/Portugal/PT1458/2020              | EPI_ISL_511417 | 3/17/20 |
| hCoV-19/Portugal/PT1460/2020              | EPI_ISL_511419 | 3/29/20 |
| hCoV-19/Portugal/PT1463/2020              | EPI_ISL_511422 | 3/30/20 |
| hCoV-19/Portugal/PT1491/2020              | EPI_ISL_511450 | 3/17/20 |
| hCoV-19/Portugal/PT1492/2020              | EPI_ISL_511451 | 3/31/20 |
| hCoV-19/Portugal/PT1503/2020              | EPI_ISL_511462 | 3/16/20 |
| hCoV-19/Portugal/PT0937/2020              | EPI_ISL_511488 | 4/3/20  |
| hCoV-19/Portugal/PT0975/2020              | EPI_ISL_511524 | 3/27/20 |
| hCoV-19/Portugal/PT0988/2020              | EPI_ISL_511536 | 3/23/20 |
| hCoV-19/Portugal/PT0989/2020              | EPI_ISL_511537 | 3/23/20 |
| hCoV-19/Portugal/PT1001/2020              | EPI_ISL_511549 | 3/22/20 |
| hCoV-19/Portugal/PT1004/2020              | EPI_ISL_511551 | 3/25/20 |
| hCoV-19/Portugal/PT1019/2020              | EPI_ISL_511566 | 3/26/20 |
| hCoV-19/Portugal/PT1103/2020              | EPI_ISL_511650 | 3/28/20 |
| hCoV-19/Portugal/PT1112/2020              | EPI_ISL_511659 | 3/27/20 |
| hCoV-19/Portugal/PT1167/2020              | EPI_ISL_511713 | 4/5/20  |
| hCoV-19/Portugal/PT1184/2020              | EPI_ISL_511729 | 3/25/20 |
| hCoV-19/Portugal/PT1216/2020              | EPI_ISL_511759 | 3/28/20 |
| hCoV-19/Vietnam/VNHN_0207/2020            | EPI_ISL_511891 | 3/8/20  |
| hCoV-19/Vietnam/VNHN_0554/2020            | EPI_ISL_511892 | 3/11/20 |
| hCoV-19/Sierra Leone/KGH-G-8549/2020      | EPI_ISL_512812 | 3/31/20 |
| hCoV-19/SaudiArabia/KAUST-JEDDAH1020/2020 | EPI_ISL_512890 | 6/23/20 |
| hCoV-19/SaudiArabia/KAUST-JEDDAH1028/2020 | EPI_ISL_512898 | 6/23/20 |
| hCoV-19/SaudiArabia/KAUST-JEDDAH529/2020  | EPI_ISL_512946 | 4/23/20 |
| hCoV-19/SaudiArabia/KAUST-JEDDAH538/2020  | EPI_ISL_512951 | 4/23/20 |
| hCoV-19/SaudiArabia/KAUST-JEDDAH544/2020  | EPI_ISL_512954 | 4/30/20 |
| hCoV-19/SaudiArabia/KAUST-JEDDAH589/2020  | EPI_ISL_512979 | 4/21/20 |
| hCoV-19/SaudiArabia/KAUST-JEDDAH592/2020  | EPI_ISL_512982 | 4/21/20 |
| hCoV-19/SaudiArabia/KAUST-JEDDAH756/2020  | EPI_ISL_512999 | 4/3/20  |
| hCoV-19/SaudiArabia/KAUST-JEDDAH886/2020  | EPI_ISL_513035 | 5/24/20 |
| hCoV-19/SaudiArabia/KAUST-JEDDAH922/2020  | EPI_ISL_513053 | 4/6/20  |
| hCoV-19/SaudiArabia/KAUST-MADINAH606/2020 | EPI_ISL_513171 | 5/6/20  |
| hCoV-19/SaudiArabia/KAUST-MADINAH955/2020 | EPI_ISL_513205 | 5/12/20 |
| hCoV-19/Saudi Arabia/KAUST-MAKKAH726/2020 | EPI_ISL_513228 | 4/16/20 |
| hCoV-19/SaudiArabia/KAUST-MAKKAH778/2020  | EPI_ISL_513247 | 4/18/20 |
| hCoV-19/USA/ME-HETL-J0001/2020            | EPI_ISL_513414 | 3/10/20 |
| hCoV-19/USA/ME-HETL-J0069/2020            | EPI_ISL_513480 | 3/21/20 |
| hCoV-19/USA/MN-MDH-1421/2020              | EPI_ISL_514640 | 3/23/20 |
| hCoV-19/USA/MN-MDH-1453/2020              | EPI_ISL_514672 | 3/26/20 |
| hCoV-19/USA/WA-UW-4616/2020               | EPI_ISL_515282 | 3/26/20 |
| hCoV-19/USA/NV-NSPHL-A0042/2020           | EPI_ISL_515325 | 3/23/20 |
| hCoV-19/USA/NV-NSPHL-A0097/2020           | EPI_ISL_515373 | 4/14/20 |
| hCoV-19/USA/NV-NSPHL-A0115/2020           | EPI_ISL_515386 | 4/20/20 |

|                                               |                |         |
|-----------------------------------------------|----------------|---------|
| hCoV-19/USA/NV-NSPHL-A0180/2020               | EPI_ISL_515437 | 5/19/20 |
| hCoV-19/Germany/BE-ChVir-D666-2/2020          | EPI_ISL_516630 | 3/7/20  |
| hCoV-19/Germany/BE-ChVir-D718-3/2020          | EPI_ISL_516631 | 3/7/20  |
| hCoV-19/Germany/BE-ChVir-D672-4/2020          | EPI_ISL_516632 | 3/7/20  |
| hCoV-19/Germany/BE-ChVir-D658-5/2020          | EPI_ISL_516633 | 3/8/20  |
| hCoV-19/Germany/BE-ChVir-D665-6/2020          | EPI_ISL_516634 | 3/6/20  |
| hCoV-19/Germany/BE-ChVir-D667-7/2020          | EPI_ISL_516635 | 3/7/20  |
| hCoV-19/Germany/BE-ChVir-D671-8/2020          | EPI_ISL_516636 | 3/7/20  |
| hCoV-19/Germany/BE-ChVir-D679-14/2020         | EPI_ISL_516642 | 3/4/20  |
| hCoV-19/Germany/BE-ChVir-D715-D799-17/2020    | EPI_ISL_516645 | 3/6/20  |
| hCoV-19/Peru/LIM-INS-046/2020                 | EPI_ISL_516646 | 4/12/20 |
| hCoV-19/USA/VA-DCLS-0825/2020                 | EPI_ISL_516699 | 5/6/20  |
| hCoV-19/England/LIVE-A72F6/2020               | EPI_ISL_517001 | 3/28/20 |
| hCoV-19/England/LIVE-A886C/2020               | EPI_ISL_517222 | 3/27/20 |
| hCoV-19/England/LIVE-A91BB/2020               | EPI_ISL_517273 | 3/25/20 |
| hCoV-19/England/LIVE-A9A47/2020               | EPI_ISL_517311 | 3/25/20 |
| hCoV-19/England/LIVE-A9A56/2020               | EPI_ISL_517312 | 3/24/20 |
| hCoV-19/England/LIVE-A9A74/2020               | EPI_ISL_517314 | 3/24/20 |
| hCoV-19/England/LIVE-A9DA8/2020               | EPI_ISL_517361 | 3/24/20 |
| hCoV-19/England/LIVE-A9DC6/2020               | EPI_ISL_517363 | 3/24/20 |
| hCoV-19/England/LIVE-AA3F0/2020               | EPI_ISL_517449 | 3/23/20 |
| hCoV-19/USA/MN-MDH-1478/2020                  | EPI_ISL_518872 | 3/25/20 |
| hCoV-19/USA/MN-MDH-1488/2020                  | EPI_ISL_518881 | 3/17/20 |
| hCoV-19/USA/MN-MDH-1494/2020                  | EPI_ISL_518887 | 3/23/20 |
| hCoV-19/United Arab Emirates/L2004034634/2020 | EPI_ISL_520669 | 4/17/20 |
| hCoV-19/United Arab Emirates/L2004034680/2020 | EPI_ISL_520671 | 4/18/20 |
| hCoV-19/United Arab Emirates/L3290250781/2020 | EPI_ISL_520698 | 5/20/20 |
| hCoV-19/Netherlands/ZH-EMC-261/2020           | EPI_ISL_523603 | 4/26/20 |
| hCoV-19/Moldova/ChVir7777/2020                | EPI_ISL_523966 | 3/12/20 |
| hCoV-19/Moldova/ChVir7776/2020                | EPI_ISL_523968 | 3/11/20 |
| hCoV-19/Russia/SPE-RII-16850V/2020            | EPI_ISL_524012 | 5/22/20 |
| hCoV-19/Russia/SPE-RII-18663V/2020            | EPI_ISL_524021 | 5/29/20 |
| hCoV-19/Russia/SPE-RII-22207V/2020            | EPI_ISL_524039 | 6/8/20  |
| hCoV-19/Switzerland/AG-UZH-1000478260/2020    | EPI_ISL_524476 | 3/2/20  |
| hCoV-19/Switzerland/ZH-UZH-1000478309/2020    | EPI_ISL_524477 | 3/3/20  |
| hCoV-19/Scotland/GCVR-171BCC/2020             | EPI_ISL_524545 | 3/28/20 |
| hCoV-19/Scotland/GCVR-1715DD/2020             | EPI_ISL_524552 | 3/30/20 |
| hCoV-19/England/CAMB-7F998/2020               | EPI_ISL_524570 | 4/9/20  |
| hCoV-19/England/LOND-1260810/2020             | EPI_ISL_524698 | 4/5/20  |
| hCoV-19/USA/UT-UPHL-2009163/2020              | EPI_ISL_525151 | 5/28/20 |
| hCoV-19/France/ARA-11231/2020                 | EPI_ISL_525543 | 3/19/20 |
| hCoV-19/USA/NY-Wadsworth-22513-01/2020        | EPI_ISL_525622 | 3/16/20 |
| hCoV-19/USA/VA-DCLS-0477/2020                 | EPI_ISL_526785 | 5/7/20  |
| hCoV-19/USA/MN-CDC-6189/2020                  | EPI_ISL_527668 | 4/21/20 |
| hCoV-19/USA/MN-CDC-6237/2020                  | EPI_ISL_527681 | 4/28/20 |

|                                          |                |         |
|------------------------------------------|----------------|---------|
| hCoV-19/USA/MN-CDC-6247/2020             | EPI_ISL_527683 | 4/28/20 |
| hCoV-19/USA/MN-CDC-6532/2020             | EPI_ISL_527721 | 4/14/20 |
| hCoV-19/Switzerland/BL-UHB-42192884/2020 | EPI_ISL_528133 | 3/16/20 |
| hCoV-19/Switzerland/BS-UHB-42199036/2020 | EPI_ISL_528235 | 3/19/20 |
| hCoV-19/Switzerland/BS-UHB-42201528/2020 | EPI_ISL_528299 | 3/21/20 |
| hCoV-19/Switzerland/BS-UHB-42202167/2020 | EPI_ISL_528323 | 3/22/20 |
| hCoV-19/Switzerland/BS-UHB-42203665/2020 | EPI_ISL_528364 | 3/23/20 |
| hCoV-19/Brazil/RJ-DCVN2/2020             | EPI_ISL_529139 | 7/20/20 |
| hCoV-19/Greece/235_31783/2020            | EPI_ISL_529147 | 3/7/20  |
| hCoV-19/Greece/45_35378/2020             | EPI_ISL_529148 | 3/18/20 |
| hCoV-19/USA/VA-DCLS-1141/2020            | EPI_ISL_529930 | 4/25/20 |
| hCoV-19/Australia/QLD961/2020            | EPI_ISL_530236 | 4/11/20 |
| hCoV-19/Australia/QLD960/2020            | EPI_ISL_530242 | 3/25/20 |
| hCoV-19/Australia/QLD1009/2020           | EPI_ISL_530269 | 3/22/20 |
| hCoV-19/England/QEUA-5319CA/2020         | EPI_ISL_532262 | 5/18/20 |
| hCoV-19/England/QEUA-54B81B/2020         | EPI_ISL_533386 | 5/12/20 |
| hCoV-19/England/QEUA-549604/2020         | EPI_ISL_533395 | 5/13/20 |
| hCoV-19/Sweden/20-52425/2020             | EPI_ISL_534245 | 7/14/20 |
| hCoV-19/Brazil/SP-316/2020               | EPI_ISL_534313 | 4/2/20  |
| hCoV-19/Russia/CRIE181019/2020           | EPI_ISL_534346 | 4/1/20  |
| hCoV-19/Russia/CRIE166064/2020           | EPI_ISL_534348 | 3/31/20 |
| hCoV-19/England/OXON-B288D/2020          | EPI_ISL_534778 | 4/13/20 |
| hCoV-19/England/OXON-B28E7/2020          | EPI_ISL_534780 | 4/10/20 |
| hCoV-19/England/OXON-B294E/2020          | EPI_ISL_534781 | 4/13/20 |
| hCoV-19/England/OXON-B2AC3/2020          | EPI_ISL_534792 | 4/13/20 |
| hCoV-19/England/OXON-B2E6D/2020          | EPI_ISL_534819 | 4/10/20 |
| hCoV-19/England/OXON-B31BE/2020          | EPI_ISL_534841 | 4/1/20  |
| hCoV-19/England/OXON-B32D9/2020          | EPI_ISL_534849 | 3/19/20 |
| hCoV-19/England/OXON-B3312/2020          | EPI_ISL_534850 | 3/19/20 |
| hCoV-19/England/OXON-B3330/2020          | EPI_ISL_534852 | 4/1/20  |
| hCoV-19/England/OXON-B35C1/2020          | EPI_ISL_534870 | 3/24/20 |
| hCoV-19/England/OXON-B35EF/2020          | EPI_ISL_534872 | 3/23/20 |
| hCoV-19/England/OXON-B36EC/2020          | EPI_ISL_534880 | 4/4/20  |
| hCoV-19/England/OXON-B3A4A/2020          | EPI_ISL_534898 | 3/22/20 |
| hCoV-19/England/OXON-B3B38/2020          | EPI_ISL_534902 | 3/20/20 |
| hCoV-19/England/OXON-B3EE4/2020          | EPI_ISL_534917 | 4/9/20  |
| hCoV-19/England/OXON-B4065/2020          | EPI_ISL_534926 | 4/3/20  |
| hCoV-19/England/OXON-B42AB/2020          | EPI_ISL_534944 | 3/29/20 |
| hCoV-19/England/OXON-B443C/2020          | EPI_ISL_534955 | 4/1/20  |
| hCoV-19/England/OXON-B478E/2020          | EPI_ISL_534972 | 4/25/20 |
| hCoV-19/England/OXON-B4D04/2020          | EPI_ISL_535007 | 3/23/20 |
| hCoV-19/Canada/QC-LSPQ-L00216532/2020    | EPI_ISL_535751 | 3/12/20 |
| hCoV-19/Canada/QC-LSPQ-L00220933/2020    | EPI_ISL_535806 | 3/15/20 |
| hCoV-19/Canada/QC-LSPQ-L00232822/2020    | EPI_ISL_535998 | 3/22/20 |
| hCoV-19/Canada/QC-LSPQ-L00233063/2020    | EPI_ISL_536008 | 3/22/20 |

|                                       |                |         |
|---------------------------------------|----------------|---------|
| hCoV-19/Canada/QC-LSPQ-L00234676/2020 | EPI_ISL_536068 | 3/23/20 |
| hCoV-19/Canada/QC-LSPQ-L00234905/2020 | EPI_ISL_536080 | 3/24/20 |
| hCoV-19/Canada/QC-LSPQ-L00235261/2020 | EPI_ISL_536092 | 3/24/20 |
| hCoV-19/Canada/QC-LSPQ-L00235552/2020 | EPI_ISL_536099 | 3/24/20 |
| hCoV-19/Canada/QC-LSPQ-L00235866/2020 | EPI_ISL_536113 | 3/22/20 |
| hCoV-19/Canada/QC-LSPQ-L00236426/2020 | EPI_ISL_536129 | 3/24/20 |
| hCoV-19/Canada/QC-LSPQ-L00236573/2020 | EPI_ISL_536138 | 3/24/20 |
| hCoV-19/Canada/QC-LSPQ-L00236653/2020 | EPI_ISL_536145 | 3/25/20 |
| hCoV-19/Canada/QC-LSPQ-L00237942/2020 | EPI_ISL_536201 | 3/25/20 |
| hCoV-19/Canada/QC-LSPQ-L00242900/2020 | EPI_ISL_536340 | 3/30/20 |
| hCoV-19/Canada/QC-LSPQ-L00243222/2020 | EPI_ISL_536350 | 3/30/20 |
| hCoV-19/Canada/QC-LSPQ-L00244338/2020 | EPI_ISL_536393 | 3/31/20 |
| hCoV-19/Peru/CAL-INS-103/2020         | EPI_ISL_536502 | 5/2/20  |
| hCoV-19/Peru/LIM-INS-111/2020         | EPI_ISL_536509 | 5/4/20  |
| hCoV-19/Peru/LIM-INS-130/2020         | EPI_ISL_536527 | 3/18/20 |
| hCoV-19/Peru/ANC-INS-132/2020         | EPI_ISL_536529 | 3/31/20 |
| hCoV-19/Peru/LIM-INS-156/2020         | EPI_ISL_536549 | 3/20/20 |
| hCoV-19/Peru/LIM-INS-159/2020         | EPI_ISL_536552 | 3/14/20 |
| hCoV-19/Spain/RI-IBV-98002316/2020    | EPI_ISL_537836 | 3/12/20 |
| hCoV-19/Spain/RI-IBV-98002345/2020    | EPI_ISL_537856 | 3/29/20 |
| hCoV-19/Spain/VC-IBV-98003118/2020    | EPI_ISL_538054 | 3/16/20 |
| hCoV-19/Canada/ON-OICR-SLB2796/2020   | EPI_ISL_538328 | 3/28/20 |
| hCoV-19/Canada/ON-OICR-SLB2797/2020   | EPI_ISL_538329 | 3/28/20 |
| hCoV-19/England/LEED-2A9A36/2020      | EPI_ISL_538798 | 4/14/20 |
| hCoV-19/England/LEED-2A9869/2020      | EPI_ISL_538918 | 4/12/20 |
| hCoV-19/England/LEED-2A8211/2020      | EPI_ISL_538992 | 4/28/20 |
| hCoV-19/England/LEED-2A8D98/2020      | EPI_ISL_539018 | 4/3/20  |
| hCoV-19/England/LEED-2A884C/2020      | EPI_ISL_539032 | 3/25/20 |
| hCoV-19/England/LEED-2A89B2/2020      | EPI_ISL_539073 | 4/3/20  |
| hCoV-19/England/LEED-2A8518/2020      | EPI_ISL_539156 | 3/25/20 |
| hCoV-19/England/LEED-2A8509/2020      | EPI_ISL_539158 | 3/30/20 |
| hCoV-19/England/LEED-2A8545/2020      | EPI_ISL_539159 | 3/27/20 |
| hCoV-19/England/LEED-2A8703/2020      | EPI_ISL_539173 | 3/24/20 |
| hCoV-19/Spain/VC-IBV-98003492/2020    | EPI_ISL_539283 | 4/8/20  |
| hCoV-19/Spain/AR-ISCI-201664/2020     | EPI_ISL_539505 | 3/4/20  |
| hCoV-19/Spain/AR-ISCI-201673/2020     | EPI_ISL_539508 | 3/7/20  |
| hCoV-19/Spain/AR-ISCI-201692/2020     | EPI_ISL_539511 | 3/7/20  |
| hCoV-19/Spain/CL-ISCI-204996/2020     | EPI_ISL_539525 | 3/19/20 |
| hCoV-19/Spain/CT-ISCI-34696/2020      | EPI_ISL_539556 | 3/2/20  |
| hCoV-19/Spain/EX-ISCI-201655/2020     | EPI_ISL_539560 | 3/7/20  |
| hCoV-19/Spain/EX-ISCI-201899/2020     | EPI_ISL_539561 | 3/9/20  |
| hCoV-19/USA/MN-MDH-1631/2020          | EPI_ISL_539825 | 4/28/20 |
| hCoV-19/USA/MN-MDH-1635/2020          | EPI_ISL_539829 | 5/5/20  |
| hCoV-19/Hong Kong/VM20005737-2/2020   | EPI_ISL_539850 | 3/25/20 |
| hCoV-19/Hong Kong/VM20008964-2/2020   | EPI_ISL_539851 | 4/3/20  |

|                                        |                |         |
|----------------------------------------|----------------|---------|
| hCoV-19/England/LOND-1286E5E/2020      | EPI_ISL_541777 | 3/25/20 |
| hCoV-19/Lithuania/MR-LUHS-Eilnr11/2020 | EPI_ISL_541848 | 4/5/20  |
| hCoV-19/USA/TX-HMH-1233/2020           | EPI_ISL_542598 | 4/23/20 |
| hCoV-19/USA/TX-HMH-1738/2020           | EPI_ISL_542805 | 3/30/20 |
| hCoV-19/USA/TX-HMH-3168/2020           | EPI_ISL_544044 | 6/10/20 |
| hCoV-19/USA/TX-HMH-476/2020            | EPI_ISL_544311 | 4/4/20  |
| hCoV-19/USA/TX-HMH-2030/2020           | EPI_ISL_545075 | 5/14/20 |
| hCoV-19/USA/TX-HMH-2319/2020           | EPI_ISL_545241 | 5/31/20 |
| hCoV-19/USA/TX-HMH-779/2020            | EPI_ISL_545637 | 4/7/20  |
| hCoV-19/Netherlands/UT-RIVM-10064/2020 | EPI_ISL_547519 | 4/8/20  |
| hCoV-19/USA/WI-GMF-19596/2020          | EPI_ISL_547826 | 9/10/20 |
| hCoV-19/Switzerland/GE-SNRCI-2616/2020 | EPI_ISL_548156 | 2020-03 |
| hCoV-19/Switzerland/GE-SNRCI-7405/2020 | EPI_ISL_548191 | 2020-03 |
| hCoV-19/Switzerland/GE-SNRCI-7699/2020 | EPI_ISL_548198 | 2020-03 |
| hCoV-19/Switzerland/GE-SNRCI-7725/2020 | EPI_ISL_548199 | 2020-03 |
| hCoV-19/Switzerland/GE-SNRCI-7808/2020 | EPI_ISL_548202 | 2020-03 |
| hCoV-19/Switzerland/GE-SNRCI-7836/2020 | EPI_ISL_548204 | 2020-03 |
| hCoV-19/Switzerland/GE-SNRCI-8226/2020 | EPI_ISL_548218 | 2020-03 |
| hCoV-19/Switzerland/GE-SNRCI-8323/2020 | EPI_ISL_548223 | 2020-03 |
| hCoV-19/Switzerland/GE-SNRCI-9173/2020 | EPI_ISL_548238 | 2020-03 |
| hCoV-19/Switzerland/GE-SNRCI-9980/2020 | EPI_ISL_548240 | 2020-03 |
| hCoV-19/Canada/ON-PHL-20-00320/2020    | EPI_ISL_548774 | 2020-03 |
| hCoV-19/USA/FL-BPHL-1465/2020          | EPI_ISL_549247 | 5/7/20  |
| hCoV-19/USA/FL-BPHL-1473/2020          | EPI_ISL_549255 | 5/12/20 |
| hCoV-19/England/CAMC-9B1E92/2020       | EPI_ISL_549398 | 9/4/20  |
| hCoV-19/England/ALDP-951C5E/2020       | EPI_ISL_551323 | 6/10/20 |
| hCoV-19/England/ALDP-52698C/2020       | EPI_ISL_558902 | 6/2/20  |
| hCoV-19/England/MILK-48ADE5/2020       | EPI_ISL_559671 | 5/18/20 |
| hCoV-19/England/QEUIH-9AF33E/2020      | EPI_ISL_559836 | 9/3/20  |
| hCoV-19/Scotland/QEUIH-99BE07/2020     | EPI_ISL_559999 | 8/30/20 |
| hCoV-19/France/PAC-IHU-0641/2020       | EPI_ISL_568909 | 4/2/20  |
| hCoV-19/France/PAC-IHU-0674/2020       | EPI_ISL_568926 | 4/15/20 |
| hCoV-19/France/PAC-IHU-0038/2020       | EPI_ISL_569262 | 3/18/20 |
| hCoV-19/France/PAC-IHU-0078/2020       | EPI_ISL_569294 | 3/20/20 |
| hCoV-19/France/PAC-IHU-0168/2020       | EPI_ISL_569345 | 3/25/20 |
| hCoV-19/France/PAC-IHU-0210/2020       | EPI_ISL_569375 | 3/28/20 |
| hCoV-19/Russia/OMS-ORINFI-6673S/2020   | EPI_ISL_569739 | 5/11/20 |
| hCoV-19/Russia/OMS-ORINFI-9080S/2020   | EPI_ISL_569746 | 5/19/20 |
| hCoV-19/Russia/OMS-ORINFI-9431S/2020   | EPI_ISL_569747 | 5/21/20 |
| hCoV-19/Russia/OMS-ORINFI-9433S/2020   | EPI_ISL_569748 | 5/21/20 |
| hCoV-19/Russia/OMS-ORINFI-2022S/2020   | EPI_ISL_569759 | 5/26/20 |
| hCoV-19/Russia/OMS-ORINFI-4143S/2020   | EPI_ISL_569766 | 5/28/20 |
| hCoV-19/Russia/OMS-ORINFI-4507S/2020   | EPI_ISL_569767 | 6/3/20  |
| hCoV-19/Russia/OMS-ORINFI-5782S/2020   | EPI_ISL_569771 | 6/5/20  |
| hCoV-19/Russia/OMS-ORINFI-3012S/2020   | EPI_ISL_569779 | 7/6/20  |

|                                            |                |         |
|--------------------------------------------|----------------|---------|
| hCoV-19/Russia/OMS-ORINFI-5912S/2020       | EPI_ISL_569803 | 6/7/20  |
| hCoV-19/Russia/OMS-ORINFI-56S-2/2020       | EPI_ISL_569810 | 6/17/20 |
| hCoV-19/Russia/OMS-ORINFI-3970S/2020       | EPI_ISL_569814 | 7/8/20  |
| hCoV-19/Russia/OMS-ORINFI-47S/2020         | EPI_ISL_569817 | 5/14/20 |
| hCoV-19/Russia/OMS-ORINFI-120S/2020        | EPI_ISL_569818 | 5/14/20 |
| hCoV-19/Russia/OMS-ORINFI-78S/2020         | EPI_ISL_569822 | 5/13/20 |
| hCoV-19/Russia/OMS-ORINFI-55S/2020         | EPI_ISL_569825 | 5/14/20 |
| hCoV-19/Russia/OMS-ORINFI-56S/2020         | EPI_ISL_569832 | 5/14/20 |
| hCoV-19/Russia/OMS-ORINFI-106S/2020        | EPI_ISL_569837 | 5/13/20 |
| hCoV-19/Russia/OMS-ORINFI-57S/2020         | EPI_ISL_569840 | 5/14/20 |
| hCoV-19/Russia/OMS-ORINFI-2887S/2020       | EPI_ISL_569841 | 4/14/20 |
| hCoV-19/Russia/OMS-ORINFI-58S/2020         | EPI_ISL_569848 | 5/14/20 |
| hCoV-19/Russia/OMS-ORINFI-60S/2020         | EPI_ISL_569855 | 5/13/20 |
| hCoV-19/Russia/OMS-ORINFI-4895S/2020       | EPI_ISL_569857 | 5/3/20  |
| hCoV-19/USA/HI-QDX-412/2020                | EPI_ISL_571184 | 3/16/20 |
| hCoV-19/USA/AZ-QDX-521/2020                | EPI_ISL_571267 | 3/18/20 |
| hCoV-19/USA/MI-QDX-628/2020                | EPI_ISL_571355 | 3/19/20 |
| hCoV-19/USA/NV-QDX-541/2020                | EPI_ISL_571393 | 3/18/20 |
| hCoV-19/USA/CA-QDX-800/2020                | EPI_ISL_571493 | 3/23/20 |
| hCoV-19/USA/LA-QDX-740/2020                | EPI_ISL_571529 | 3/18/20 |
| hCoV-19/USA/CA-QDX-1036/2020               | EPI_ISL_571701 | 3/16/20 |
| hCoV-19/USA/PA-QDX-1191/2020               | EPI_ISL_572034 | 3/16/20 |
| hCoV-19/England/CAMC-9C1C0E/2020           | EPI_ISL_573226 | 9/9/20  |
| hCoV-19/England/NORT-2A0CA2/2020           | EPI_ISL_573363 | 4/30/20 |
| hCoV-19/Singapore/1016/2020                | EPI_ISL_574501 | 3/22/20 |
| hCoV-19/Singapore/1022/2020                | EPI_ISL_574507 | 3/23/20 |
| hCoV-19/Singapore/1030/2020                | EPI_ISL_574515 | 3/24/20 |
| hCoV-19/Singapore/1036/2020                | EPI_ISL_574521 | 3/22/20 |
| hCoV-19/Switzerland/BE-UNIBE-162-0355/2020 | EPI_ISL_574802 | 3/16/20 |
| hCoV-19/Switzerland/TI-ETHZ-100170/2020    | EPI_ISL_574958 | 3/16/20 |
| hCoV-19/England/MILK-9E12E8/2020           | EPI_ISL_577068 | 9/21/20 |
| hCoV-19/England/MILK-9E1303/2020           | EPI_ISL_577070 | 9/21/20 |
| hCoV-19/USA/WI-WSLH-200220/2020            | EPI_ISL_578440 | 4/10/20 |
| hCoV-19/New Zealand/20CV0288/2020          | EPI_ISL_579078 | 3/26/20 |
| hCoV-19/New Zealand/20VR1888/2020          | EPI_ISL_579156 | 3/23/20 |
| hCoV-19/New Zealand/20VR1962/2020          | EPI_ISL_579181 | 4/5/20  |
| hCoV-19/New Zealand/20VR2579/2020          | EPI_ISL_579310 | 3/25/20 |
| hCoV-19/New Zealand/20VR3203/2020          | EPI_ISL_579488 | 3/31/20 |
| hCoV-19/England/ALDP-9EDB2D/2020           | EPI_ISL_580679 | 5/9/20  |
| hCoV-19/England/ALDP-9EDAD5/2020           | EPI_ISL_580689 | 5/8/20  |
| hCoV-19/England/ALDP-9EDB5A/2020           | EPI_ISL_580835 | 5/9/20  |
| hCoV-19/Germany/BW-UKT-034/2020            | EPI_ISL_581478 | 3/22/20 |
| hCoV-19/Austria/CeMM0655/2020              | EPI_ISL_583626 | 3/26/20 |
| hCoV-19/Austria/CeMM0945/2020              | EPI_ISL_583797 | 3/27/20 |
| hCoV-19/England/CWAR-24FDCBD/2020          | EPI_ISL_584507 | 5/5/20  |

|                                           |                |         |
|-------------------------------------------|----------------|---------|
| hCoV-19/Northern Ireland/NIRE-106FC0/2020 | EPI_ISL_585094 | 3/30/20 |
| hCoV-19/Northern Ireland/NIRE-10731E/2020 | EPI_ISL_585137 | 3/30/20 |
| hCoV-19/Northern Ireland/NIRE-1073F0/2020 | EPI_ISL_585146 | 3/31/20 |
| hCoV-19/Northern Ireland/NIRE-10740C/2020 | EPI_ISL_585147 | 3/31/20 |
| hCoV-19/Northern Ireland/NIRE-107457/2020 | EPI_ISL_585151 | 3/31/20 |
| hCoV-19/Northern Ireland/NIRE-107475/2020 | EPI_ISL_585153 | 3/31/20 |
| hCoV-19/Northern Ireland/NIRE-107509/2020 | EPI_ISL_585162 | 3/30/20 |
| hCoV-19/Northern Ireland/NIRE-107545/2020 | EPI_ISL_585166 | 3/30/20 |
| hCoV-19/Canada/ON-S1225/2020              | EPI_ISL_586301 | 3/28/20 |
| hCoV-19/Canada/ON-S842/2020               | EPI_ISL_586457 | 2020-04 |
| hCoV-19/Canada/ON-S854/2020               | EPI_ISL_586459 | 4/11/20 |
| hCoV-19/Canada/ON-S901/2020               | EPI_ISL_586474 | 4/12/20 |
| hCoV-19/Canada/ON-S917/2020               | EPI_ISL_586485 | 4/13/20 |
| hCoV-19/England/ALDP-9ED5C5/2020          | EPI_ISL_589299 | 5/8/20  |
| hCoV-19/England/ALDP-9ED6D1/2020          | EPI_ISL_589319 | 5/8/20  |
| hCoV-19/England/ALDP-9EE1C0/2020          | EPI_ISL_589410 | 5/6/20  |
| hCoV-19/England/ALDP-9ED5F2/2020          | EPI_ISL_589449 | 5/8/20  |
| hCoV-19/England/ALDP-9ED02E/2020          | EPI_ISL_589470 | 5/4/20  |
| hCoV-19/England/ALDP-9ED05B/2020          | EPI_ISL_589504 | 5/4/20  |
| hCoV-19/England/ALDP-9ED097/2020          | EPI_ISL_589506 | 5/5/20  |
| hCoV-19/England/ALDP-9ED5D4/2020          | EPI_ISL_589534 | 5/8/20  |
| hCoV-19/Switzerland/ZH-UZH-IMV5/2020      | EPI_ISL_590827 | 3/11/20 |
| hCoV-19/Canada/ON-S780/2020               | EPI_ISL_591226 | 2020-04 |
| hCoV-19/Canada/ON-S888/2020               | EPI_ISL_591255 | 4/12/20 |
| hCoV-19/Japan/IC-0014/2020                | EPI_ISL_591359 | 2020-03 |
| hCoV-19/Japan/IC-0016/2020                | EPI_ISL_591361 | 2020-04 |
| hCoV-19/Switzerland/GE-SNRCI-6928/2020    | EPI_ISL_548181 | 2020-03 |



| Location                                       | Host  | Gender  |
|------------------------------------------------|-------|---------|
| Asia / China / Chongqing                       | Human | Female  |
| Europe / Germany / Baden-W?rttemberg           | Human | unknown |
| South America / Brazil / Sao Paulo / Sao Paulo | Human | Male    |
| North America / Mexico / Mexico City           | Human | Male    |
| Europe / Switzerland / Zurich                  | Human | Male    |
| Europe / Netherlands / Blaricum                | Human | unknown |
| Europe / Netherlands / Nootdorp                | Human | unknown |
| Europe / Netherlands / Rotterdam               | Human | unknown |
| Europe / Netherlands / Tilburg                 | Human | unknown |
| Europe / Netherlands / Zeewolde                | Human | unknown |
| Europe / Finland / Helsinki                    | Human | Male    |
| Europe / Portugal                              | Human | Male    |
| Europe / Switzerland / Ticino                  | Human | Male    |
| Europe / Switzerland / Aargau                  | Human | Male    |
| South America / Brazil / Sao Paulo             | Human | Male    |
| South America / Brazil / Sao Paulo / Sao Paulo | Human | Female  |
| South America / Brazil / Sao Paulo / Sao Paulo | Human | Female  |
| South America / Brazil / Sao Paulo             | Human | Female  |
| Europe / Switzerland / Geneve                  | Human | Male    |
| Europe / Switzerland / Geneve                  | Human | Female  |
| Europe / Netherlands / Gelderland              | Human | unknown |
| Europe / Netherlands / Noord Holland           | Human | unknown |
| Europe / Netherlands / Utrecht                 | Human | unknown |
| Europe / Netherlands / Utrecht                 | Human | unknown |
| Europe / Netherlands / Zuid Holland            | Human | unknown |
| Europe / France / Hauts-de-France / Compi?gne  | Human | Male    |
| Europe / France / Hauts-de-France / Compi?gne  | Human | Male    |
| Europe / France / Grand-Est / Reims            | Human | Male    |
| Europe / Finland                               | Human | Female  |
| Europe / Belgium / Sint-Niklaas                | Human | Male    |
| Europe / Netherlands / Gelderland              | Human | unknown |
| Europe / Netherlands                           | Human | unknown |
| Europe / Netherlands / Noord Brabant           | Human | unknown |
| Europe / Netherlands / Noord Brabant           | Human | unknown |
| Europe / Netherlands / Zuid Holland            | Human | unknown |
| Europe / Netherlands / Zuid Holland            | Human | unknown |
| Europe / Denmark                               | Human | Male    |
| Europe / Switzerland / Basel-Stadt             | Human | unknown |
| Asia / China / Hangzhou                        | Human | Male    |
| Asia / China / Hangzhou                        | Human | Female  |
| South America / Brazil / Sao Paulo / Sao Paulo | Human | Female  |
| South America / Brazil / Sao Paulo / Sao Paulo | Human | Male    |
| Europe / Denmark / Copenhagen                  | Human | Female  |
| Oceania / Australia / Victoria / Melbourne     | Human | Male    |

|                                                         |       |         |
|---------------------------------------------------------|-------|---------|
| Asia / Vietnam / Quangning                              | Human | Female  |
| Asia / Vietnam / Hanoi                                  | Human | Male    |
| Asia / Vietnam / Hanoi                                  | Human | Female  |
| Asia / Georgia / Tbilisi                                | Human | Male    |
| Asia / Georgia / Tbilisi                                | Human | Female  |
| Europe / France / Normandie / Rouen                     | Human | Male    |
| Oceania / New Zealand / Auckland                        | Human | Female  |
| North America / USA / Washington                        | Human | unknown |
| North America / USA / Connecticut                       | Human | unknown |
| Europe / United Kingdom / England / London              | Human | Male    |
| Europe / Lithuania / Vilnius                            | Human | unknown |
| Europe / Czech Republic / Prague                        | Human | unknown |
| North America / USA / New York / New York City          | Human | unknown |
| Europe / Belgium / Liège                                | Human | Female  |
| Europe / Spain / Galicia                                | Human | Female  |
| Europe / Spain / Madrid                                 | Human | Female  |
| Oceania / Australia / Queensland / Rockhampton          | Human | Male    |
| Africa / South Africa / KZN                             | Human | Male    |
| Europe / United Kingdom / England                       | Human | Female  |
| Europe / United Kingdom / England                       | Human | Female  |
| Europe / United Kingdom / England                       | Human | Female  |
| Europe / United Kingdom / England                       | Human | Male    |
| Europe / United Kingdom / England                       | Human | Male    |
| Europe / United Kingdom / England                       | Human | Male    |
| Europe / United Kingdom / England                       | Human | Female  |
| North America / USA / Connecticut                       | Human | unknown |
| Europe / Belgium / Dilbeek                              | Human | Male    |
| Europe / Belgium / Kasterlee                            | Human | Female  |
| Europe / Belgium / Schoten                              | Human | Male    |
| Europe / Belgium / Leuven                               | Human | Male    |
| Europe / Belgium / Holsbeek                             | Human | Male    |
| Europe / Germany / North Rhine-Westphalia / Duesseldorf | Human | unknown |
| Europe / Iceland / Reykjavik                            | Human | Female  |
| Europe / Iceland / Reykjavik                            | Human | Male    |
| Europe / Iceland / Reykjavik                            | Human | Male    |
| Europe / Iceland / Reykjavik                            | Human | Male    |
| Europe / Iceland / Reykjavik                            | Human | Male    |
| Europe / Iceland / Reykjavik                            | Human | Male    |
| Europe / Iceland / Reykjavik                            | Human | Female  |
| Europe / Iceland / Reykjavik                            | Human | Female  |
| Europe / Iceland / Reykjavik                            | Human | Male    |
| Europe / Iceland / Reykjavik                            | Human | Male    |
| Europe / Iceland / Reykjavik                            | Human | Male    |
| Europe / Iceland / Reykjavik                            | Human | Female  |
| Europe / Iceland / Reykjavik                            | Human | Male    |

|                                                          |       |         |
|----------------------------------------------------------|-------|---------|
| Europe / Iceland / Reykjavik                             | Human | Male    |
| Europe / Iceland / Reykjavik                             | Human | Male    |
| Europe / Iceland / Reykjavik                             | Human | Male    |
| Europe / Iceland / Reykjavik                             | Human | Female  |
| Europe / Spain / Madrid                                  | Human | Female  |
| Europe / Portugal                                        | Human | Male    |
| Europe / Portugal                                        | Human | Male    |
| Europe / Portugal                                        | Human | Male    |
| Europe / Portugal                                        | Human | Female  |
| North America / USA / Connecticut                        | Human | unknown |
| Europe / Belgium / Antwerp                               | Human | Female  |
| North America / Canada / Ontario                         | Human | Male    |
| North America / Canada / Ontario                         | Human | Female  |
| North America / Canada / Ontario                         | Human | Female  |
| North America / Canada / Ontario                         | Human | Female  |
| North America / Canada / Ontario                         | Human | Female  |
| North America / Canada / Ontario                         | Human | Male    |
| Europe / France / Auvergne-Rhône-Alpes / Bourg-en-Bresse | Human | Male    |
| Europe / Ireland / Wicklow                               | Human | Female  |
| Europe / Belgium / Liège                                 | Human | Female  |
| Europe / United Kingdom / England                        | Human | Male    |
| Europe / Belgium / Kalmthout                             | Human | Male    |
| Oceania / Australia / Queensland / Brisbane              | Human | Female  |
| Oceania / Australia / Queensland / Gold Coast            | Human | Female  |
| Europe / Spain / Catalunya / Barcelona                   | Human | Male    |
| North America / USA / Washington                         | Human | unknown |
| Europe / Belgium / Merelbeke                             | Human | Male    |
| Europe / France / Auvergne-Rhône-Alpes / Lyon            | Human | Female  |
| Europe / Spain / Canary Islands                          | Human | Male    |
| Asia / Japan / Saitama                                   | Human | Male    |
| Asia / Japan / Saitama                                   | Human | Female  |
| Asia / Japan / Saitama                                   | Human | Female  |
| Asia / Japan / Saitama                                   | Human | Female  |
| Asia / Japan / Saitama                                   | Human | Male    |
| Asia / Japan / Chiba                                     | Human | Female  |
| Europe / United Kingdom / Wales                          | Human | Male    |
| North America / USA / Georgia                            | Human | Male    |
| Europe / Luxembourg                                      | Human | Female  |
| Europe / Luxembourg                                      | Human | Female  |
| Europe / Belarus                                         | Human | unknown |
| Oceania / Australia / Victoria                           | Human | Female  |
| Oceania / Australia / Victoria                           | Human | Male    |
| Oceania / Australia / Victoria                           | Human | Female  |
| Oceania / Australia / Victoria                           | Human | Male    |
| Oceania / Australia / Victoria                           | Human | Female  |

|                                                     |       |         |
|-----------------------------------------------------|-------|---------|
| Oceania / Australia / Victoria                      | Human | Male    |
| Oceania / Australia / Victoria                      | Human | Male    |
| Oceania / Australia / Victoria                      | Human | Male    |
| Oceania / Australia / Victoria                      | Human | Male    |
| Oceania / Australia / Victoria                      | Human | Female  |
| Oceania / Australia / Victoria                      | Human | Male    |
| Oceania / Australia / Victoria                      | Human | Female  |
| Oceania / Australia / Victoria                      | Human | Male    |
| Oceania / Australia / Victoria                      | Human | Male    |
| Oceania / Australia / Victoria                      | Human | Female  |
| Oceania / Australia / Victoria                      | Human | Female  |
| Oceania / Australia / Victoria                      | Human | Male    |
| Oceania / Australia / Victoria                      | Human | Female  |
| Oceania / Australia / Victoria                      | Human | Female  |
| Oceania / Australia / Victoria                      | Human | Male    |
| Europe / France / Île-de-France / Paris             | Human | Female  |
| Europe / France / Île-de-France / Longjumeau        | Human | Male    |
| Europe / Russia / Saint Petersburg                  | Human | Female  |
| Asia / Georgia / Tbilisi                            | Human | Female  |
| Europe / Norway                                     | Human | unknown |
| Europe / United Kingdom / England / South Yorkshire | Human | Female  |
| Europe / United Kingdom / England / South Yorkshire | Human | Male    |
| North America / USA / Alaska / Anchorage            | Human | Female  |
| North America / USA / New York / Manhattan          | Human | Male    |
| Europe / Belgium / Herstal                          | Human | Female  |
| Europe / Belgium / Bierset                          | Human | Male    |
| Europe / Belgium / Herve                            | Human | Female  |
| Europe / Belgium / Theux                            | Human | Male    |
| Europe / Belgium / Couvin                           | Human | Male    |
| Europe / Belgium / Gent                             | Human | Female  |
| Europe / Belgium / Lasne                            | Human | Male    |
| North America / USA / New York / Manhattan          | Human | Female  |
| North America / USA / New York / Manhattan          | Human | Female  |
| South America / Argentina                           | Human | Male    |
| Europe / United Kingdom / England                   | Human | Female  |
| Europe / United Kingdom / England                   | Human | Male    |
| Europe / United Kingdom / England                   | Human | Male    |
| Europe / United Kingdom / England                   | Human | Male    |
| Europe / United Kingdom / England                   | Human | Male    |
| North America / USA / New Hampshire                 | Human | Male    |
| North America / USA / New Hampshire                 | Human | Male    |
| Europe / Belgium / Liège                            | Human | Male    |
| Asia / China / Hangzhou                             | Human | Female  |
| North America / USA / New York / Manhattan          | Human | Female  |
| Europe / Portugal                                   | Human | Male    |

|                                                |       |         |
|------------------------------------------------|-------|---------|
| Europe / Portugal                              | Human | Female  |
| Europe / Portugal                              | Human | Female  |
| Europe / Portugal                              | Human | Male    |
| Europe / Portugal                              | Human | Male    |
| Europe / Portugal                              | Human | Female  |
| North America / USA / New York / Manhattan     | Human | Male    |
| Europe / Luxembourg                            | Human | Male    |
| Europe / Luxembourg                            | Human | Male    |
| Europe / Luxembourg                            | Human | Female  |
| Europe / United Kingdom / England              | Human | Male    |
| Europe / United Kingdom / England              | Human | Male    |
| Europe / United Kingdom / England              | Human | Male    |
| Europe / United Kingdom / Wales                | Human | Male    |
| Europe / United Kingdom / Wales                | Human | Male    |
| Europe / United Kingdom / Wales                | Human | Male    |
| Europe / United Kingdom / Wales                | Human | Female  |
| Europe / United Kingdom / Wales                | Human | Male    |
| Europe / United Kingdom / Wales                | Human | Male    |
| Europe / United Kingdom / Wales                | Human | Female  |
| Europe / United Kingdom / Wales                | Human | Female  |
| Europe / United Kingdom / Wales                | Human | Male    |
| Europe / United Kingdom / Wales                | Human | Male    |
| Europe / United Kingdom / Wales                | Human | Male    |
| Asia / Kuwait / Dasman                         | Human | Male    |
| North America / USA / New York / Nassau County | Human | Male    |
| Europe / Netherlands / Zuid Holland            | Human | unknown |
| Europe / United Kingdom / England              | Human | Male    |
| Europe / United Kingdom / England              | Human | Female  |
| Europe / United Kingdom / England              | Human | Female  |
| Europe / United Kingdom / England              | Human | Male    |
| Europe / United Kingdom / England              | Human | Male    |
| Europe / United Kingdom / England              | Human | Male    |
| Europe / United Kingdom / England              | Human | Male    |
| Europe / United Kingdom / England              | Human | Male    |
| Europe / United Kingdom / England              | Human | Male    |
| Europe / United Kingdom / England              | Human | Female  |
| Europe / United Kingdom / England              | Human | Female  |
| Europe / United Kingdom / England              | Human | Female  |
| Asia / India                                   | Human | Female  |
| Asia / India                                   | Human | Female  |
| Europe / Iceland / Reykjavik                   | Human | unknown |
| Europe / Iceland / Reykjavik                   | Human | Female  |
| Europe / Iceland / Reykjavik                   | Human | Female  |
| Europe / Iceland / Reykjavik                   | Human | Male    |
| Europe / Belgium / Liège                       | Human | unknown |

|                                                      |       |         |
|------------------------------------------------------|-------|---------|
| Europe / Belgium / Liège                             | Human | unknown |
| North America / USA / New Hampshire                  | Human | Male    |
| North America / USA / Iowa                           | Human | Male    |
| North America / USA / Iowa                           | Human | Female  |
| North America / USA / Iowa                           | Human | Male    |
| North America / USA / Iowa                           | Human | Female  |
| North America / USA / South Carolina                 | Human | Male    |
| North America / USA / New York / Brooklyn            | Human | Female  |
| Europe / Belgium / Ghent                             | Human | unknown |
| Europe / United Kingdom / England                    | Human | Male    |
| Europe / United Kingdom / England                    | Human | Female  |
| Europe / United Kingdom / England                    | Human | Female  |
| Europe / United Kingdom / England                    | Human | Male    |
| Europe / United Kingdom / England                    | Human | Male    |
| Europe / United Kingdom / England                    | Human | Male    |
| Europe / United Kingdom / England                    | Human | Male    |
| North America / USA / Idaho                          | Human | unknown |
| Europe / Czech Republic / Central Czechia and Prague | Human | Male    |
| Europe / Czech Republic / Central Czechia and Prague | Human | Male    |
| North America / USA / Arizona                        | Human | unknown |
| North America / USA / Arizona                        | Human | unknown |
| Asia / Taiwan / New Taipei City                      | Human | Male    |
| Oceania / Australia / Victoria                       | Human | Male    |
| Oceania / Australia / Victoria                       | Human | Male    |
| Oceania / Australia / Victoria                       | Human | Female  |
| Oceania / Australia / Victoria                       | Human | Male    |
| Oceania / Australia / Victoria                       | Human | Male    |
| Oceania / Australia / Victoria                       | Human | Male    |
| Europe / Czech Republic                              | Human | unknown |
| Europe / Czech Republic                              | Human | unknown |
| Europe / Czech Republic                              | Human | unknown |
| Oceania / Australia / Victoria                       | Human | Male    |
| Oceania / Australia / Victoria                       | Human | Male    |
| Oceania / Australia / Victoria                       | Human | Male    |
| Oceania / Australia / Victoria                       | Human | Male    |
| Oceania / Australia / Victoria                       | Human | Female  |
| Oceania / Australia / Victoria                       | Human | Female  |
| Europe / Russia / Saint Petersburg                   | Human | Male    |
| Europe / Russia / Saint Petersburg                   | Human | Female  |
| Europe / Russia / Saint Petersburg                   | Human | Male    |
| Europe / Russia / Saint Petersburg                   | Human | unknown |
| Europe / Russia / Saint Petersburg                   | Human | unknown |
| Asia / Taiwan / New Taipei City                      | Human | Male    |
| North America / USA / Wisconsin / Dane County        | Human | unknown |
| North America / USA / New York / Manhattan           | Human | unknown |

|                                                         |       |         |
|---------------------------------------------------------|-------|---------|
| North America / USA / New York / Manhattan              | Human | unknown |
| Europe / France / Île-de-France / Garches               | Human | Male    |
| Asia / Sri Lanka                                        | Human | Male    |
| Europe / Spain / Madrid                                 | Human | Male    |
| Europe / Spain / Madrid                                 | Human | Female  |
| Europe / Spain / Madrid                                 | Human | Male    |
| Europe / Spain / Madrid                                 | Human | Female  |
| Europe / Spain / Madrid                                 | Human | Female  |
| Asia / Singapore                                        | Human | Male    |
| Europe / Russia / Moscow                                | Human | Male    |
| Europe / Russia / Moscow                                | Human | Male    |
| Europe / Russia / Moscow                                | Human | Male    |
| Europe / Russia / Saint Petersburg                      | Human | Female  |
| Europe / Russia / Moscow                                | Human | Female  |
| Europe / Russia / Moscow Region                         | Human | Male    |
| Europe / Russia / Omsk                                  | Human | Female  |
| Europe / Russia / Samara                                | Human | Male    |
| Europe / Russia / Buryatia                              | Human | Female  |
| Europe / Russia / Sakha (Yakutia)                       | Human | Male    |
| Europe / Russia / Primorsky                             | Human | Female  |
| Europe / Russia / Pskov                                 | Human | Male    |
| Europe / Russia / Buryatia                              | Human | Male    |
| Europe / Russia / Buryatia                              | Human | Male    |
| Europe / Russia / Buryatia                              | Human | Female  |
| Europe / Russia / Sverdlovsk                            | Human | Female  |
| Europe / Russia / Tatarstan                             | Human | Male    |
| Europe / Russia / Buryatia                              | Human | Male    |
| Europe / Russia / Buryatia                              | Human | Female  |
| Europe / Luxembourg                                     | Human | Male    |
| North America / USA / California / San Francisco County | Human | unknown |
| North America / USA / California / San Francisco County | Human | unknown |
| Asia / China / Guangzhou                                | Human | Male    |
| Asia / China / Guangzhou                                | Human | Male    |
| Europe / Sweden / Halland                               | Human | Female  |
| Europe / Sweden / Halland                               | Human | Male    |
| Europe / Sweden / Halland                               | Human | Female  |
| Europe / Sweden / Halland                               | Human | Male    |
| Europe / Sweden / Varmland                              | Human | Male    |
| Europe / Sweden / Varmland                              | Human | Male    |
| Europe / Sweden / Ostergotland                          | Human | Male    |
| Europe / Switzerland / Geneve                           | Human | unknown |
| Europe / Denmark                                        | Human | unknown |
| Europe / Denmark                                        | Human | unknown |
| Europe / Denmark                                        | Human | unknown |
| Europe / Denmark                                        | Human | unknown |

|                                                             |       |         |
|-------------------------------------------------------------|-------|---------|
| Europe / Denmark                                            | Human | unknown |
| Europe / Denmark                                            | Human | unknown |
| Europe / Denmark                                            | Human | unknown |
| Europe / Luxembourg                                         | Human | Male    |
| Europe / Luxembourg                                         | Human | Female  |
| Europe / Russia / Saint Petersburg                          | Human | Male    |
| Europe / Russia / Saint Petersburg                          | Human | Male    |
| Europe / Russia / Saint Petersburg                          | Human | Female  |
| Europe / Russia / Saint Petersburg                          | Human | Male    |
| Europe / Russia / Saint Petersburg                          | Human | Female  |
| Europe / Russia / Saint Petersburg                          | Human | unknown |
| Europe / Russia / Saint Petersburg                          | Human | Female  |
| Europe / Russia / Buryatia / Ulan-Ude                       | Human | Female  |
| North America / USA / Washington / King County              | Human | unknown |
| Europe / Greece / Athens                                    | Human | Male    |
| South America / Argentina / Ciudad Autonoma de Buenos Aires | Human | Male    |
| South America / Argentina / Ciudad Autonoma de Buenos Aires | Human | Male    |
| South America / Argentina / Ciudad Autonoma de Buenos Aires | Human | Male    |
| South America / Argentina / Ciudad Autonoma de Buenos Aires | Human | Male    |
| Europe / Sweden / Halland                                   | Human | Male    |
| Europe / Sweden / Varmland                                  | Human | Male    |
| Asia / India / Telangana / Hyderabad                        | Human | Female  |
| Asia / India / Telangana / Hyderabad                        | Human | Male    |
| Europe / United Kingdom / Wales                             | Human | unknown |
| Europe / United Kingdom / Wales                             | Human | unknown |
| Europe / United Kingdom / Wales                             | Human | unknown |
| Europe / United Kingdom / Wales                             | Human | unknown |
| Europe / United Kingdom / Wales                             | Human | unknown |
| Europe / United Kingdom / Wales                             | Human | unknown |
| Europe / United Kingdom / Wales                             | Human | unknown |
| Europe / United Kingdom / Wales                             | Human | unknown |
| Europe / United Kingdom / Wales                             | Human | unknown |
| Europe / United Kingdom / Scotland                          | Human | unknown |
| Europe / United Kingdom / Scotland                          | Human | unknown |
| Europe / United Kingdom / England                           | Human | unknown |
| Europe / United Kingdom / England                           | Human | unknown |
| Europe / United Kingdom / England                           | Human | unknown |
| Europe / United Kingdom / England                           | Human | unknown |
| Europe / United Kingdom / England                           | Human | unknown |
| Europe / United Kingdom / England                           | Human | unknown |
| Europe / United Kingdom / England                           | Human | unknown |
| Europe / United Kingdom / England                           | Human | unknown |
| North America / USA / Washington / Yakima County            | Human | unknown |
| Europe / Greece / Athens                                    | Human | unknown |
| Europe / Greece / Athens                                    | Human | unknown |
| Europe / Greece / Athens                                    | Human | unknown |



|                                                                           |       |         |
|---------------------------------------------------------------------------|-------|---------|
| Europe / Greece / Athens                                                  | Human | unknown |
| Europe / Greece / Athens                                                  | Human | unknown |
| Europe / Greece / Athens                                                  | Human | unknown |
| Europe / Greece / Athens                                                  | Human | unknown |
| Europe / Greece / Athens                                                  | Human | unknown |
| Europe / Greece / Athens                                                  | Human | unknown |
| Europe / Greece / Athens                                                  | Human | unknown |
| Europe / Greece / Athens                                                  | Human | unknown |
| Europe / Greece / Athens                                                  | Human | unknown |
| Europe / Greece / Athens                                                  | Human | unknown |
| Europe / Luxembourg                                                       | Human | Male    |
| North America / USA / Puerto Rico                                         | Human | unknown |
| Europe / France / Occitanie                                               | Human | unknown |
| Europe / Sweden / Uppsala                                                 | Human | Female  |
| Europe / Sweden / Stockholm                                               | Human | Female  |
| Europe / Sweden / Dalarna                                                 | Human | Female  |
| Europe / Sweden / Dalarna                                                 | Human | Female  |
| Europe / Sweden / Stockholm                                               | Human | Female  |
| Europe / Sweden / Uppsala                                                 | Human | Male    |
| North America / USA / Texas                                               | Human | unknown |
| North America / USA / Texas                                               | Human | unknown |
| Asia / United Arab Emirates                                               | Human | Male    |
| Asia / Vietnam / Hanoi                                                    | Human | Male    |
| Asia / Vietnam / Hanoi                                                    | Human | Female  |
| Asia / Vietnam                                                            | Human | Male    |
| Asia / Vietnam                                                            | Human | Female  |
| Europe / Hungary / Oroshaza                                               | Human | Female  |
| Europe / Hungary / Kecskemet                                              | Human | Male    |
| North America / USA / New York / Nassau County                            | Human | Female  |
| Europe / Spain / Comunitat Valenciana / Valencia / Valencia               | Human | Male    |
| Europe / Spain / Comunitat Valenciana / Valencia / Valencia               | Human | Male    |
| Europe / Spain / Comunitat Valenciana / Valencia / Valencia               | Human | Female  |
| Europe / Spain / Comunitat Valenciana / Valencia / Aduanas de Mar         | Human | Female  |
| Europe / Spain / Comunitat Valenciana / Valencia / Simat de la Vallidigna | Human | Female  |
| Europe / Spain / Comunitat Valenciana / Valencia / Valencia               | Human | Female  |
| Europe / Spain / Comunitat Valenciana / Valencia / Requena                | Human | Female  |
| North America / USA / Pennsylvania / Allegheny County / Pittsburgh        | Human | unknown |
| North America / USA / Michigan                                            | Human | unknown |
| North America / USA / Michigan                                            | Human | unknown |
| North America / USA / Michigan                                            | Human | unknown |
| North America / USA / Michigan                                            | Human | unknown |
| Europe / Latvia                                                           | Human | unknown |
| Europe / Latvia                                                           | Human | unknown |
| Europe / Germany / Bavaria / Munich                                       | Human | Male    |
| Europe / Germany / Bavaria / Munich                                       | Human | Female  |

|                                                |       |         |
|------------------------------------------------|-------|---------|
| Europe / Germany / Bavaria / Munich            | Human | Male    |
| Europe / Germany / Bavaria / Munich            | Human | Female  |
| Europe / Germany / Bavaria / Munich            | Human | Female  |
| Europe / Germany / Bavaria / Munich            | Human | Female  |
| Europe / Germany / Bavaria / Munich            | Human | Female  |
| Europe / Germany / Bavaria / Munich            | Human | Female  |
| Europe / Germany / Bavaria / Munich            | Human | Female  |
| Europe / Germany / Bavaria / Munich            | Human | Male    |
| Europe / Turkey / Kocaeli                      | Human | Male    |
| Asia / Saudi Arabia / Jeddah                   | Human | Male    |
| Europe / Czech Republic / Prague               | Human | Male    |
| Europe / Denmark                               | Human | unknown |
| Asia / Saudi Arabia / Jeddah                   | Human | Male    |
| Asia / Saudi Arabia / Jeddah                   | Human | Female  |
| Asia / Saudi Arabia / Jeddah                   | Human | Male    |
| North America / USA / Virginia                 | Human | unknown |
| Europe / Greece / Athens                       | Human | unknown |
| Europe / Greece / Athens                       | Human | unknown |
| Europe / Austria / Innsbruck                   | Human | Female  |
| Europe / Austria                               | Human | Female  |
| Europe / Austria / Vienna                      | Human | Female  |
| Europe / Austria / Vienna                      | Human | Male    |
| North America / USA / Washington / King County | Human | unknown |
| North America / USA / Washington / King County | Human | unknown |
| North America / USA / Washington / King County | Human | unknown |
| Europe / United Kingdom / Scotland             | Human | unknown |
| Europe / United Kingdom / Scotland             | Human | unknown |
| Europe / United Kingdom / Scotland             | Human | unknown |
| Europe / United Kingdom / Scotland             | Human | unknown |
| Europe / United Kingdom / England              | Human | unknown |
| Europe / United Kingdom / England              | Human | unknown |
| Europe / United Kingdom / England              | Human | unknown |
| Europe / United Kingdom / England              | Human | unknown |
| Europe / United Kingdom / England              | Human | unknown |
| Europe / United Kingdom / England              | Human | unknown |
| Europe / United Kingdom / England              | Human | unknown |
| Europe / United Kingdom / England              | Human | unknown |
| Europe / United Kingdom / England              | Human | unknown |
| Europe / United Kingdom / Northern Ireland     | Human | unknown |
| Europe / United Kingdom / Northern Ireland     | Human | unknown |
| Europe / United Kingdom / Northern Ireland     | Human | unknown |
| Europe / United Kingdom / Northern Ireland     | Human | unknown |
| Europe / United Kingdom / Northern Ireland     | Human | unknown |
| Europe / United Kingdom / England              | Human | unknown |
| Asia / Singapore                               | Human | Male    |

|                                                                     |       |         |
|---------------------------------------------------------------------|-------|---------|
| Asia / Singapore                                                    | Human | Male    |
| Europe / France / Bretagne / Brest                                  | Human | Female  |
| Europe / United Kingdom / England                                   | Human | unknown |
| Europe / United Kingdom / England                                   | Human | unknown |
| Europe / United Kingdom / England                                   | Human | unknown |
| Europe / United Kingdom / England                                   | Human | unknown |
| Asia / India / Gujarat / Ahmedabad                                  | Human | Female  |
| North America / USA / New York / Manhattan                          | Human | Male    |
| North America / USA / New York / Queens                             | Human | Female  |
| North America / USA / New York / Bronx                              | Human | Male    |
| Europe / Denmark                                                    | Human | unknown |
| Europe / Spain / Catalunya                                          | Human | Female  |
| Europe / Spain / Catalunya                                          | Human | Male    |
| Europe / Spain / Catalunya                                          | Human | Male    |
| Europe / Sweden / Uppsala                                           | Human | Male    |
| South America / Chile / Los Lagos / Llanquihue / Puerto Montt       | Human | Female  |
| South America / Chile / Region Metropolitana de Santiago / Santiago | Human | Female  |
| South America / Chile / Region Metropolitana de Santiago / Santiago | Human | Male    |
| South America / Chile / Magallanes / Punta Arenas                   | Human | Male    |
| South America / Chile / Region Metropolitana de Santiago / Santiago | Human | Male    |
| South America / Chile / Region Metropolitana de Santiago / Santiago | Human | Female  |
| South America / Chile / Region Metropolitana de Santiago / Santiago | Human | Female  |
| South America / Chile / Region Metropolitana de Santiago / Santiago | Human | Female  |
| South America / Chile / Region Metropolitana de Santiago / Santiago | Human | Female  |
| South America / Chile / Region Metropolitana de Santiago / Santiago | Human | Female  |
| South America / Chile / Region Metropolitana de Santiago / Santiago | Human | Male    |
| South America / Chile / Region Metropolitana de Santiago / Santiago | Human | Female  |
| South America / Chile / Region Metropolitana de Santiago / Santiago | Human | Male    |
| Europe / United Kingdom / Wales                                     | Human | unknown |
| Europe / United Kingdom / Wales                                     | Human | unknown |
| Europe / United Kingdom / Wales                                     | Human | unknown |
| Europe / United Kingdom / Wales                                     | Human | unknown |
| Europe / United Kingdom / Wales                                     | Human | unknown |
| Asia / India / Gujarat / Ahmedabad                                  | Human | Female  |
| Asia / India / Gujarat / Gandhinagar                                | Human | Male    |
| Europe / Belgium / Liege                                            | Human | unknown |
| Europe / Spain / Comunitat Valenciana / Palma de Gandia             | Human | Male    |
| Europe / Spain / Comunitat Valenciana / Bonrepos i Mirambell        | Human | Male    |
| Europe / Spain / Catalunya                                          | Human | Female  |
| Europe / Spain / Catalunya                                          | Human | Female  |
| Asia / India / Gujarat / Gandhinagar                                | Human | Male    |
| Europe / Germany / Hesse / Frankfurt                                | Human | unknown |
| Europe / Greece / Athens                                            | Human | unknown |
| Europe / Greece / Athens                                            | Human | unknown |
| Europe / Greece / Athens                                            | Human | unknown |



|                                                       |       |         |
|-------------------------------------------------------|-------|---------|
| North America / USA / Washington / King County        | Human | unknown |
| North America / USA / Washington / King County        | Human | unknown |
| North America / USA / Washington / King County        | Human | unknown |
| North America / USA / Washington / King County        | Human | unknown |
| North America / USA / Washington / King County        | Human | unknown |
| North America / USA / Washington / King County        | Human | unknown |
| North America / USA / Washington / Snohomish County   | Human | unknown |
| North America / USA / Washington / King County        | Human | unknown |
| North America / USA / New York                        | Human | Male    |
| North America / USA / New York / Manhattan            | Human | Male    |
| North America / USA / New York / Manhattan            | Human | Female  |
| Asia / Thailand / Nonthaburi                          | Human | unknown |
| Europe / Germany / Bavaria                            | Human | unknown |
| Europe / Russia / Saint Petersburg                    | Human | Male    |
| Europe / Russia / Saint Petersburg                    | Human | Female  |
| Europe / Russia / Saint Petersburg                    | Human | Female  |
| Europe / Russia / Saint Petersburg                    | Human | Male    |
| Europe / Russia / Saint Petersburg                    | Human | Female  |
| Europe / Russia / Saint Petersburg                    | Human | Female  |
| Europe / Russia / Saint Petersburg                    | Human | Male    |
| Europe / Russia / Saint Petersburg                    | Human | Male    |
| Europe / Russia / Saint Petersburg                    | Human | Male    |
| Asia / India / Maharashtra / Kolhapur                 | Human | Female  |
| Asia / Hong Kong                                      | Human | unknown |
| Europe / Germany / Hamburg                            | Human | unknown |
| North America / USA / California / Santa Clara County | Human | Male    |
| Europe / Lithuania                                    | Human | unknown |
| Asia / Lebanon / Beirut                               | Human | Female  |
| Europe / Sweden / Kalmar                              | Human | Female  |
| Europe / Sweden / Vastra Gotaland                     | Human | Male    |
| Oceania / Australia / South Australia                 | Human | unknown |
| Africa / Uganda                                       | Human | unknown |
| Asia / China / Sichuan                                | Human | Male    |
| Asia / China / Sichuan                                | Human | Female  |
| Europe / Poland / Malopolska / Krak?w                 | Human | 35      |
| Europe / Poland / Malopolska / Krak?w                 | Human | 2       |
| Europe / Poland / Malopolska / Krak?w                 | Human | 38      |
| Europe / Denmark                                      | Human | unknown |
| North America / USA / Minnesota                       | Human | unknown |
| North America / USA / Virgin Islands                  | Human | unknown |
| North America / Mexico / State of Mexico              | Human | Male    |
| Europe / Belgium / Brussels                           | Human | Male    |
| Europe / Germany / Hesse / Frankfurt                  | Human | Male    |
| Europe / Sweden / Vastra Gotaland                     | Human | Female  |
| Europe / Sweden / Vastra Gotaland                     | Human | Male    |

|                                                 |       |         |
|-------------------------------------------------|-------|---------|
| North America / USA / Michigan                  | Human | unknown |
| Europe / Spain / Navarra / Pamplona             | Human | Male    |
| Europe / Spain / Basque Country / San Sebastian | Human | Female  |
| Europe / Spain / Basque Country / San Sebastian | Human | Male    |
| Europe / Spain / Basque Country / San Sebastian | Human | Female  |
| Europe / United Kingdom / Scotland              | Human | unknown |
| Europe / United Kingdom / Northern Ireland      | Human | unknown |
| Europe / Portugal                               | Human | unknown |
| Europe / Portugal                               | Human | unknown |
| Europe / Portugal                               | Human | unknown |
| Europe / Portugal                               | Human | unknown |
| Europe / Portugal                               | Human | unknown |
| Europe / Portugal                               | Human | unknown |
| Europe / Portugal                               | Human | unknown |
| Europe / Portugal                               | Human | unknown |
| Europe / Portugal                               | Human | unknown |
| Europe / Portugal                               | Human | unknown |
| Europe / Portugal                               | Human | unknown |
| Europe / Portugal                               | Human | unknown |
| Europe / Portugal                               | Human | unknown |
| Europe / Portugal                               | Human | unknown |
| Europe / Portugal                               | Human | unknown |
| Europe / Portugal                               | Human | unknown |
| Europe / Portugal                               | Human | unknown |
| Europe / Portugal                               | Human | unknown |
| Europe / Portugal                               | Human | unknown |
| Europe / Portugal                               | Human | unknown |
| Europe / Portugal                               | Human | unknown |
| Europe / Portugal                               | Human | unknown |
| Europe / Portugal                               | Human | unknown |
| Europe / Portugal                               | Human | unknown |
| Europe / Portugal                               | Human | unknown |
| Europe / Portugal                               | Human | unknown |
| Europe / Portugal                               | Human | unknown |
| Europe / Portugal                               | Human | unknown |
| Europe / Portugal                               | Human | unknown |
| Europe / Portugal                               | Human | unknown |
| Europe / Portugal                               | Human | unknown |
| Europe / Sweden / Halland                       | Human | Female  |
| Europe / Sweden / Halland                       | Human | Male    |
| Europe / Sweden / Halland                       | Human | Female  |
| Europe / Sweden / Halland                       | Human | Female  |
| Europe / Sweden / Gavleborg                     | Human | Female  |
| Europe / Sweden / Stockholm                     | Human | Female  |
| Europe / Sweden / Stockholm                     | Human | Male    |
| Europe / Sweden / Stockholm                     | Human | Female  |
| Europe / Sweden / Stockholm                     | Human | Female  |

|                                                         |       |         |
|---------------------------------------------------------|-------|---------|
| Europe / Sweden / Stockholm                             | Human | Female  |
| Europe / Sweden / Stockholm                             | Human | Male    |
| Europe / Sweden / Stockholm                             | Human | Female  |
| Europe / Sweden / Stockholm                             | Human | Male    |
| Europe / Sweden / Stockholm                             | Human | Female  |
| Europe / Sweden / Stockholm                             | Human | Female  |
| Europe / Sweden / Stockholm                             | Human | Female  |
| Europe / Sweden / Stockholm                             | Human | Male    |
| Europe / Sweden / Stockholm                             | Human | Female  |
| North America / USA / California / San Francisco County | Human | unknown |
| North America / USA / California / San Francisco County | Human | unknown |
| North America / USA / California / Humboldt County      | Human | unknown |
| North America / USA / Virgin Islands                    | Human | unknown |
| North America / USA / Virgin Islands                    | Human | unknown |
| Europe / Netherlands / Utrecht                          | Human | Female  |
| Europe / Netherlands / Utrecht                          | Human | Female  |
| Europe / Sweden / Stockholm                             | Human | Female  |
| Europe / Sweden / Stockholm                             | Human | Male    |
| Europe / Sweden / Stockholm                             | Human | Male    |
| Europe / Sweden / Stockholm                             | Human | Male    |
| Europe / Sweden / Stockholm                             | Human | Female  |
| Europe / Sweden / Stockholm                             | Human | Female  |
| Europe / Sweden / Stockholm                             | Human | Male    |
| Europe / Sweden / Stockholm                             | Human | Male    |
| Europe / Sweden / Stockholm                             | Human | Female  |
| Europe / Sweden / Stockholm                             | Human | Male    |
| Europe / Sweden / Stockholm                             | Human | Male    |
| Europe / Sweden / Stockholm                             | Human | Female  |
| Asia / China / Hubei / Wuhan                            | Human | unknown |
| Asia / China / Hubei / Wuhan                            | Human | unknown |
| Europe / Netherlands                                    | Human | unknown |
| Europe / Spain / Galicia                                | Human | Female  |
| Europe / Spain / Galicia                                | Human | Female  |
| Europe / Poland / Malopolska / Krakow                   | Human | Female  |
| Europe / Poland / Mazowieckie / Grodzisk Mazowiecki     | Human | Female  |
| Europe / Poland / Warminsko-Mazurskie / Olsztyn         | Human | Male    |
| Europe / Poland / Mazowieckie / Warszawa                | Human | Male    |
| Asia / India / West Bengal / North 24 Parganas          | Human | Male    |
| Asia / China / Jiangsu / Changzhou                      | Human | unknown |
| Asia / Vietnam / Hanoi                                  | Human | Male    |
| Asia / Vietnam / Hanoi                                  | Human | Male    |
| Asia / Vietnam / Hanoi                                  | Human | Male    |
| Asia / Vietnam / Quangninh                              | Human | Male    |
| Europe / Sweden / Stockholm                             | Human | Female  |
| Europe / Sweden / Stockholm                             | Human | Female  |

|                                                |       |         |
|------------------------------------------------|-------|---------|
| Europe / Sweden / Stockholm                    | Human | Male    |
| Europe / Sweden / Stockholm                    | Human | Female  |
| Europe / Sweden / Stockholm                    | Human | Male    |
| Europe / Sweden / Stockholm                    | Human | Male    |
| Europe / Sweden / Stockholm                    | Human | Female  |
| Europe / Sweden / Stockholm                    | Human | Female  |
| Europe / Sweden / Stockholm                    | Human | Female  |
| Europe / Sweden / Stockholm                    | Human | Female  |
| Europe / Sweden / Stockholm                    | Human | Male    |
| Europe / Sweden / Stockholm                    | Human | Male    |
| Europe / Sweden / Stockholm                    | Human | Male    |
| Europe / Sweden / Stockholm                    | Human | Male    |
| Europe / Sweden / Stockholm                    | Human | Female  |
| Europe / Sweden / Stockholm                    | Human | Male    |
| Europe / Sweden / Stockholm                    | Human | Female  |
| Europe / Sweden / Stockholm                    | Human | Male    |
| Europe / Sweden / Stockholm                    | Human | Male    |
| Europe / Sweden / Stockholm                    | Human | Female  |
| Europe / Sweden / Stockholm                    | Human | Male    |
| Europe / Sweden / Stockholm                    | Human | Male    |
| Europe / Sweden / Uppsala                      | Human | Male    |
| Europe / Sweden / Uppsala                      | Human | Male    |
| Europe / Sweden / Uppsala                      | Human | Male    |
| Europe / Sweden / Uppsala                      | Human | Female  |
| North America / USA / New York / Brooklyn      | Human | Male    |
| North America / USA / New York / Nassau County | Human | Male    |
| South America / Colombia / Antioquia / Bello   | Human | Male    |
| Oceania / New Zealand / Lakes                  | Human | unknown |
| Oceania / New Zealand / Bay of Plenty          | Human | unknown |
| Oceania / New Zealand / Auckland               | Human | unknown |
| Oceania / New Zealand / Auckland               | Human | unknown |
| Oceania / Australia / Victoria                 | Human | Male    |
| Europe / United Kingdom / England              | Human | unknown |
| Europe / United Kingdom / England              | Human | unknown |
| Europe / United Kingdom / England              | Human | unknown |
| Europe / United Kingdom / England              | Human | unknown |
| Europe / United Kingdom / England              | Human | unknown |
| Europe / United Kingdom / England              | Human | unknown |
| Europe / United Kingdom / England              | Human | unknown |
| Europe / United Kingdom / England              | Human | unknown |
| Europe / United Kingdom / England              | Human | unknown |
| Europe / United Kingdom / England              | Human | unknown |
| Europe / Estonia                               | Human | unknown |
| Europe / Estonia                               | Human | unknown |
| Asia / Taiwan / Taipei                         | Human | Female  |
| Asia / Oman / Muscat                           | Human | Male    |



|                                                                 |       |         |
|-----------------------------------------------------------------|-------|---------|
| Asia / Oman / Muscat                                            | Human | Female  |
| Europe / Belgium / Sterrebeek                                   | Human | Male    |
| North America / USA / California / San Diego County             | Human | unknown |
| Africa / Morocco                                                | Human | unknown |
| Africa / Morocco                                                | Human | unknown |
| North America / USA / Massachusetts                             | Human | unknown |
| Europe / Netherlands / Zeeland                                  | Human | unknown |
| Asia / India / Gujarat / Ahmedabad                              | Human | Male    |
| Europe / Belgium / Brasschaat                                   | Human | Female  |
| Asia / Japan                                                    | Human | unknown |
| Europe / Bosnia and Herzegovina / Sarajevo                      | Human | unknown |
| Europe / Bosnia and Herzegovina / Sarajevo                      | Human | unknown |
| Europe / Bosnia and Herzegovina / Sarajevo                      | Human | unknown |
| Europe / Bosnia and Herzegovina / Novi Travnik                  | Human | unknown |
| Europe / Bosnia and Herzegovina / Ilidza                        | Human | unknown |
| Europe / Bosnia and Herzegovina / Sarajevo                      | Human | unknown |
| Africa / Nigeria                                                | Human | unknown |
| North America / USA / Washington / Snohomish County             | Human | unknown |
| North America / USA / Washington / Yakima County                | Human | unknown |
| North America / USA / Washington / Yakima County                | Human | unknown |
| Europe / Cyprus                                                 | Human | Female  |
| Europe / Cyprus                                                 | Human | Female  |
| Europe / Cyprus                                                 | Human | Female  |
| North America / Canada / Ontario / Toronto                      | Human | unknown |
| Africa / South Africa / Western Cape Province / Cape Town Metro | Human | Male    |
| Africa / South Africa / Western Cape Province / Cape Town Metro | Human | Male    |
| Asia / Bangladesh / Dhaka / Dhaka / Mohammadpur                 | Human | Male    |
| Europe / United Kingdom / England                               | Human | Female  |
| Europe / United Kingdom / England                               | Human | Male    |
| Europe / United Kingdom / England                               | Human | Female  |
| Europe / United Kingdom / England                               | Human | Male    |
| Europe / United Kingdom / England                               | Human | Male    |
| Europe / United Kingdom / England                               | Human | Male    |
| Europe / United Kingdom / England                               | Human | Female  |
| Europe / United Kingdom / England                               | Human | Female  |
| Europe / United Kingdom / England                               | Human | Female  |
| North America / Canada / Quebec                                 | Human | Male    |
| Europe / United Kingdom / England                               | Human | Female  |
| Europe / United Kingdom / England                               | Human | Male    |
| Europe / United Kingdom / England                               | Human | Male    |
| Europe / United Kingdom / England                               | Human | Female  |
| Europe / United Kingdom / England                               | Human | Male    |
| Europe / United Kingdom / England                               | Human | Female  |
| Europe / United Kingdom / England                               | Human | Female  |
| Europe / United Kingdom / England                               | Human | Female  |

|                                                 |       |         |
|-------------------------------------------------|-------|---------|
| Europe / United Kingdom / England               | Human | Male    |
| Europe / United Kingdom / England               | Human | Male    |
| Europe / United Kingdom / England               | Human | Female  |
| Europe / United Kingdom / England               | Human | Female  |
| Europe / United Kingdom / England               | Human | Female  |
| Asia / Bangladesh / Dhaka / Dhaka / Uttara      | Human | Female  |
| North America / Canada / British Columbia       | Human | unknown |
| Europe / Germany / Bavaria / Munich             | Human | Female  |
| Europe / Spain / Andalucia / Granada            | Human | Female  |
| Europe / Spain / Canary Islands / Las Palmas    | Human | Male    |
| Europe / Spain / Madrid / Ambite                | Human | Female  |
| Europe / Spain / Madrid                         | Human | Male    |
| Europe / Spain / Madrid / Valdaracete           | Human | Female  |
| North America / Canada / British Columbia       | Human | unknown |
| North America / Canada / British Columbia       | Human | unknown |
| North America / USA / New York / Manhattan      | Human | Female  |
| Africa / South Africa / KZN / Morningside       | Human | Female  |
| Africa / South Africa / KZN / Berea             | Human | Female  |
| Africa / South Africa / KZN / Morningside       | Human | Female  |
| Africa / South Africa / KZN / Berea             | Human | Female  |
| Africa / South Africa / KZN / Berea             | Human | Male    |
| Africa / South Africa / KZN / Berea             | Human | Male    |
| Africa / South Africa / KZN / Berea             | Human | unknown |
| Africa / South Africa / KZN / Umbilo            | Human | Female  |
| Europe / Russia / Moscow                        | Human | Male    |
| North America / USA / Virginia                  | Human | unknown |
| North America / USA / Virginia                  | Human | unknown |
| North America / USA / Virginia                  | Human | unknown |
| Oceania / Australia / South Australia           | Human | unknown |
| Europe / Romania / Bucuresti                    | Human | Male    |
| Europe / Romania / Bucuresti                    | Human | Female  |
| North America / USA / California                | Human | Female  |
| North America / USA / California                | Human | Male    |
| North America / USA / Indiana                   | Human | Male    |
| North America / USA / New York                  | Human | Female  |
| Asia / Japan                                    | Human | unknown |
| Asia / Japan                                    | Human | unknown |
| Europe / Spain / Basque Country / San Sebastian | Human | Female  |
| Europe / Spain / Basque Country / San Sebastian | Human | Female  |
| Europe / Spain / Basque Country / San Sebastian | Human | Male    |
| Europe / Sweden / Kalmar                        | Human | Female  |
| Europe / Sweden / Vastra Gotaland               | Human | Female  |
| Europe / Sweden / Halland                       | Human | Male    |
| Europe / Sweden / Halland                       | Human | Male    |
| Europe / Sweden / Uppsala                       | Human | Male    |

|                                                       |       |         |
|-------------------------------------------------------|-------|---------|
| Asia / Saudi Arabia / Jeddah                          | Human | unknown |
| Europe / United Kingdom / England                     | Human | unknown |
| Europe / United Kingdom / England                     | Human | unknown |
| Europe / United Kingdom / England                     | Human | unknown |
| Europe / United Kingdom / Scotland                    | Human | unknown |
| Oceania / Australia / Western Australia               | Human | Female  |
| Europe / Russia / Moscow                              | Human | Male    |
| Europe / Russia / Moscow                              | Human | Female  |
| North America / USA / Wisconsin                       | Human | unknown |
| Europe / United Kingdom / England                     | Human | unknown |
| Europe / United Kingdom / Wales                       | Human | unknown |
| Europe / United Kingdom / Wales                       | Human | unknown |
| Europe / United Kingdom / Wales                       | Human | unknown |
| Europe / United Kingdom / Wales                       | Human | unknown |
| Europe / United Kingdom / Wales                       | Human | unknown |
| Europe / United Kingdom / Wales                       | Human | unknown |
| Europe / United Kingdom / Wales                       | Human | unknown |
| Europe / United Kingdom / Wales                       | Human | unknown |
| Europe / United Kingdom / Wales                       | Human | unknown |
| Europe / United Kingdom / Wales                       | Human | unknown |
| Europe / Spain / Murcia / Murcia                      | Human | Male    |
| Asia / Israel / Holon                                 | Human | Female  |
| Asia / Israel / Yehud                                 | Human | Male    |
| Asia / Israel / Netanya                               | Human | Male    |
| Asia / Israel / Bat-Yam                               | Human | Female  |
| Asia / Israel / Tirat Zvi                             | Human | Female  |
| Asia / Bangladesh / Rangpur                           | Human | Male    |
| Europe / Sweden / Halland                             | Human | Male    |
| Europe / Sweden / Halland                             | Human | Female  |
| Europe / Sweden / Halland                             | Human | Male    |
| Europe / Sweden / Vasternorrland                      | Human | Female  |
| Europe / Sweden / Halland                             | Human | Female  |
| Europe / Sweden / Uppsala                             | Human | Female  |
| Europe / Sweden / Jamtland                            | Human | Female  |
| Europe / Sweden / Stockholm                           | Human | Male    |
| North America / USA / California / Los Angeles County | Human | Female  |
| North America / USA / California / Los Angeles County | Human | Female  |
| Europe / Spain / Basque Country / San Sebastian       | Human | unknown |
| Europe / Austria / Losenstein                         | Human | Male    |
| Africa / Morocco                                      | Human | unknown |
| Asia / India / Gujarat / Surat                        | Human | Male    |
| Asia / India / Gujarat / Surat                        | Human | Male    |
| North America / USA / Connecticut                     | Human | unknown |
| North America / USA / Connecticut                     | Human | unknown |
| North America / USA / Connecticut                     | Human | unknown |
| North America / USA / Connecticut                     | Human | unknown |

|                                               |       |         |
|-----------------------------------------------|-------|---------|
| Asia / Singapore                              | Human | Female  |
| North America / USA / Virginia                | Human | unknown |
| Europe / United Kingdom / England             | Human | unknown |
| Europe / United Kingdom / England             | Human | unknown |
| Europe / United Kingdom / England             | Human | unknown |
| Europe / United Kingdom / England             | Human | unknown |
| Europe / United Kingdom / England             | Human | unknown |
| Europe / United Kingdom / England             | Human | unknown |
| Europe / United Kingdom / England             | Human | unknown |
| Europe / United Kingdom / England             | Human | unknown |
| Europe / United Kingdom / England             | Human | unknown |
| Europe / United Kingdom / England             | Human | unknown |
| Europe / United Kingdom / England             | Human | unknown |
| Europe / United Kingdom / England             | Human | unknown |
| Europe / United Kingdom / England             | Human | unknown |
| Europe / United Kingdom / England             | Human | unknown |
| Europe / United Kingdom / England             | Human | unknown |
| Europe / United Kingdom / England             | Human | unknown |
| Europe / United Kingdom / England             | Human | unknown |
| Europe / United Kingdom / England             | Human | unknown |
| Europe / United Kingdom / England             | Human | unknown |
| Africa / Egypt                                | Human | unknown |
| Asia / Japan / HokurikuShinsyu                | Human | unknown |
| Asia / Japan / HokurikuShinsyu                | Human | unknown |
| Asia / India / Odisha                         | Human | Male    |
| Asia / India / Odisha                         | Human | Male    |
| South America / Ecuador / Los Rios / Babahoyo | Human | Male    |
| Europe / Finland / Uusimaa                    | Human | Female  |
| Europe / Finland / Uusimaa                    | Human | Male    |
| North America / Canada / New Brunswick        | Human | unknown |
| Europe / United Kingdom / Northern Ireland    | Human | unknown |
| Europe / United Kingdom / Northern Ireland    | Human | unknown |
| Europe / United Kingdom / England             | Human | unknown |
| Europe / United Kingdom / England             | Human | unknown |
| North America / USA / Oregon                  | Human | Female  |
| North America / USA / Oregon                  | Human | Female  |
| North America / USA / Oregon                  | Human | Female  |
| North America / USA / Oregon                  | Human | Male    |
| North America / USA / Oregon                  | Human | Female  |
| North America / USA / Oregon                  | Human | Male    |
| North America / USA / Oregon                  | Human | Male    |
| North America / USA / Oregon                  | Human | Male    |
| North America / USA / Oregon                  | Human | Male    |
| North America / USA / Oregon                  | Human | Male    |
| North America / USA / Oregon                  | Human | Male    |
| Asia / China / Zhejiang / Hangzhou            | Human | Male    |
| Europe / Netherlands                          | Human | unknown |
| North America / USA / Minnesota               | Human | unknown |

|                                                     |       |         |
|-----------------------------------------------------|-------|---------|
| North America / USA / Minnesota                     | Human | unknown |
| North America / USA / Minnesota                     | Human | unknown |
| Oceania / New Zealand                               | Human | unknown |
| Oceania / Australia / South Australia               | Human | unknown |
| North America / USA / California / San Diego County | Human | unknown |
| Asia / Bangladesh / Chittagong / Chandpur           | Human | Male    |
| Asia / Israel / Kfar Saba                           | Human | Female  |
| Asia / India / Gujarat / Surat                      | Human | Male    |
| North America / USA / Washington                    | Human | unknown |
| Europe / Latvia                                     | Human | unknown |
| Europe / Switzerland / Ticino                       | Human | unknown |
| Europe / Russia / Moscow                            | Human | Female  |
| Asia / Bahrain                                      | Human | unknown |
| Asia / Bangladesh / Barisal                         | Human | Male    |
| Europe / United Kingdom / Scotland                  | Human | unknown |
| Europe / United Kingdom / Scotland                  | Human | unknown |
| Europe / United Kingdom / England                   | Human | unknown |
| Europe / United Kingdom / England                   | Human | unknown |
| Europe / United Kingdom / England                   | Human | unknown |
| Europe / United Kingdom / England                   | Human | unknown |
| Europe / United Kingdom / England                   | Human | unknown |
| Europe / United Kingdom / England                   | Human | unknown |
| Europe / United Kingdom / England                   | Human | unknown |
| Europe / United Kingdom / England                   | Human | unknown |
| Europe / United Kingdom / England                   | Human | unknown |
| Europe / United Kingdom / England                   | Human | unknown |
| Europe / United Kingdom / England                   | Human | unknown |
| Europe / United Kingdom / Scotland                  | Human | unknown |
| Europe / United Kingdom / Scotland                  | Human | unknown |
| Europe / United Kingdom / Northern Ireland          | Human | unknown |
| Europe / United Kingdom / Northern Ireland          | Human | unknown |
| Europe / United Kingdom / Northern Ireland          | Human | unknown |
| Asia / Bangladesh / Khulna                          | Human | Male    |
| Asia / Bangladesh / Khulna                          | Human | Male    |
| Asia / Bangladesh / Khulna                          | Human | Male    |
| North America / USA / Idaho                         | Human | unknown |
| Europe / Romania / Suceava                          | Human | Female  |
| Europe / Romania / Suceava                          | Human | Male    |
| Europe / Czech Republic / Prague                    | Human | Male    |
| Asia / Oman / Dakhiliyah / Nizwa                    | Human | Female  |
| North America / Costa Rica / Alajuela               | Human | Male    |
| South America / Brazil / Rio de Janeiro / Niteroi   | Human | Male    |
| Oceania / Australia / South Australia               | Human | unknown |
| Europe / United Kingdom / England                   | Human | unknown |
| Europe / United Kingdom / England                   | Human | unknown |
| Europe / United Kingdom / England                   | Human | unknown |

|                                                     |       |         |
|-----------------------------------------------------|-------|---------|
| Europe / United Kingdom / England                   | Human | unknown |
| Europe / United Kingdom / England                   | Human | unknown |
| Europe / United Kingdom / England                   | Human | unknown |
| Europe / United Kingdom / England                   | Human | unknown |
| Europe / United Kingdom / England                   | Human | unknown |
| Europe / United Kingdom / England                   | Human | unknown |
| Europe / United Kingdom / England                   | Human | unknown |
| North America / USA / Missouri / St. Louis          | Human | unknown |
| North America / USA / Missouri / St. Louis          | Human | unknown |
| North America / USA / Missouri / St. Louis          | Human | unknown |
| Europe / United Kingdom / Wales                     | Human | unknown |
| Europe / United Kingdom / Wales                     | Human | unknown |
| Europe / United Kingdom / Wales                     | Human | unknown |
| North America / USA / California / San Diego County | Human | unknown |
| North America / USA / Texas                         | Human | Male    |
| North America / USA / California / San Diego County | Human | unknown |
| North America / USA / California / San Diego County | Human | unknown |
| North America / USA / California / San Diego County | Human | unknown |
| North America / Canada / Ontario                    | Human | unknown |
| Asia / India / Gujarat / Kamrej                     | Human | Male    |
| Asia / India / Gujarat / Surat                      | Human | Male    |
| North America / USA / Florida                       | Human | unknown |
| North America / USA / Washington / Yakima County    | Human | unknown |
| North America / USA / Washington / Spokane County   | Human | unknown |
| Asia / India / Maharashtra                          | Human | Female  |
| North America / USA / Washington / Yakima County    | Human | unknown |
| North America / USA / Washington / Yakima County    | Human | unknown |
| Asia / Hong Kong                                    | Human | unknown |
| Asia / South Korea                                  | Human | Male    |
| Asia / South Korea                                  | Human | Female  |
| Asia / South Korea                                  | Human | Female  |
| Asia / South Korea                                  | Human | Female  |
| Asia / Bangladesh / Khulna                          | Human | Female  |
| Asia / Bangladesh / Sylhet / Moulvibazar            | Human | Male    |
| Europe / United Kingdom / Wales                     | Human | unknown |
| Europe / United Kingdom / England                   | Human | unknown |
| Europe / United Kingdom / England                   | Human | unknown |
| Europe / United Kingdom / England                   | Human | unknown |
| Europe / United Kingdom / England                   | Human | unknown |
| Europe / United Kingdom / England                   | Human | unknown |
| Europe / United Kingdom / England                   | Human | unknown |
| Europe / United Kingdom / England                   | Human | unknown |
| Europe / United Kingdom / England                   | Human | unknown |
| Europe / United Kingdom / England                   | Human | unknown |
| Oceania / Australia / New South Wales               | Human | Female  |

|                                           |       |         |
|-------------------------------------------|-------|---------|
| Oceania / Australia / New South Wales     | Human | Male    |
| Oceania / Australia / New South Wales     | Human | Female  |
| North America / USA / Virginia            | Human | unknown |
| North America / USA / Virginia            | Human | unknown |
| North America / USA / Virginia            | Human | unknown |
| Europe / United Kingdom / England         | Human | unknown |
| Europe / United Kingdom / England         | Human | unknown |
| Europe / United Kingdom / England         | Human | unknown |
| Asia / Bangladesh / Chittagong / Chandpur | Human | Male    |
| Asia / South Korea                        | Human | Female  |
| Asia / South Korea                        | Human | Male    |
| Asia / South Korea                        | Human | Female  |
| Asia / Saudi Arabia                       | Human | unknown |
| Asia / Saudi Arabia                       | Human | unknown |
| Asia / Saudi Arabia                       | Human | unknown |
| Asia / Saudi Arabia                       | Human | unknown |
| Asia / Saudi Arabia                       | Human | unknown |
| Asia / Saudi Arabia                       | Human | unknown |
| Asia / Saudi Arabia                       | Human | unknown |
| Asia / Saudi Arabia                       | Human | unknown |
| Europe / United Kingdom / England         | Human | unknown |
| Europe / United Kingdom / England         | Human | unknown |
| Europe / United Kingdom / England         | Human | unknown |
| Europe / United Kingdom / England         | Human | unknown |
| Europe / United Kingdom / England         | Human | unknown |
| Europe / United Kingdom / England         | Human | unknown |
| Europe / United Kingdom / England         | Human | unknown |
| Europe / Russia / Novosibirsk             | Human | Female  |
| Europe / Russia / Yamalo-Nenets           | Human | Male    |
| Europe / Russia / Yamalo-Nenets           | Human | Male    |
| Europe / Russia / Yamalo-Nenets           | Human | Male    |
| Europe / Russia / Yamalo-Nenets           | Human | Male    |
| Europe / Russia / Saint Petersburg        | Human | unknown |
| Europe / Russia / Saint Petersburg        | Human | Female  |
| Europe / Russia / Saint Petersburg        | Human | Female  |
| Europe / Russia / Saint Petersburg        | Human | Female  |
| Europe / Russia / Saint Petersburg        | Human | Male    |
| Europe / Russia / Saint Petersburg        | Human | Male    |
| Europe / Russia / Saint Petersburg        | Human | Female  |
| Europe / Russia / Saint Petersburg        | Human | Female  |
| Europe / Russia / Saint Petersburg        | Human | Female  |
| Europe / Russia / Saint Petersburg        | Human | Male    |
| Europe / Russia / Saint Petersburg        | Human | Male    |

|                                                   |       |         |
|---------------------------------------------------|-------|---------|
| Europe / Russia / Saint Petersburg                | Human | Male    |
| Europe / Russia / Saint Petersburg                | Human | Male    |
| Europe / Russia / Saint Petersburg                | Human | Female  |
| Europe / Russia / Saint Petersburg                | Human | Male    |
| North America / USA / Minnesota                   | Human | unknown |
| Oceania / Australia / South Australia             | Human | unknown |
| Oceania / Australia / South Australia             | Human | unknown |
| Asia / India / West Bengal / Kolkata              | Human | Male    |
| Asia / India / West Bengal / Howrah               | Human | Female  |
| Asia / India / West Bengal / Kolkata              | Human | Male    |
| Asia / India / West Bengal / Hooghly              | Human | Male    |
| Asia / India / West Bengal / Kolkata              | Human | Female  |
| Asia / India / West Bengal / Kolkata              | Human | Male    |
| North America / USA / Florida                     | Human | unknown |
| North America / USA / Florida                     | Human | unknown |
| Europe / France / Auvergne-Rhône-Alpes / Lyon     | Human | Male    |
| Europe / France / Auvergne-Rhône-Alpes / Lyon     | Human | Male    |
| Europe / France / Auvergne-Rhône-Alpes / Lyon     | Human | Male    |
| Africa / South Africa / KZN                       | Human | Male    |
| Africa / South Africa / KZN                       | Human | Female  |
| Europe / Spain / Andalucía / Malaga               | Human | Female  |
| Europe / Spain / Andalucía / Malaga               | Human | Male    |
| North America / Guatemala                         | Human | Male    |
| North America / Guatemala                         | Human | Male    |
| North America / USA / Florida                     | Human | unknown |
| Europe / Spain / Catalunya / Barcelona            | Human | Female  |
| Europe / Spain / Catalunya / Barcelona            | Human | Female  |
| Europe / Spain / Catalunya / Barcelona            | Human | Male    |
| Europe / Spain / Galicia / Noya                   | Human | Female  |
| Europe / Spain / Galicia / Santiago de Compostela | Human | Male    |
| Europe / Spain / Galicia / Bertamirans            | Human | Male    |
| Europe / Spain / Galicia / Santiago de Compostela | Human | Female  |
| Europe / Spain / Galicia / Santiago de Compostela | Human | Female  |
| Europe / Spain / Galicia / Santiago de Compostela | Human | Female  |
| Europe / Spain / Basque Country / San Sebastian   | Human | Female  |
| Europe / Spain / Basque Country / San Sebastian   | Human | Female  |
| Europe / Spain / Basque Country / San Sebastian   | Human | Female  |
| Europe / Spain / Basque Country / San Sebastian   | Human | Male    |
| Europe / Sweden / Stockholm                       | Human | Male    |
| Europe / Sweden / Västernorrland                  | Human | Male    |
| Europe / Sweden / Varmland                        | Human | Male    |
| Europe / Portugal                                 | Human | unknown |
| Europe / Portugal                                 | Human | unknown |
| Europe / Portugal                                 | Human | unknown |
| Europe / Portugal                                 | Human | unknown |







|                                               |       |         |
|-----------------------------------------------|-------|---------|
| North America / USA / Nevada                  | Human | unknown |
| Europe / Germany / Berlin                     | Human | unknown |
| Europe / Germany / Berlin                     | Human | unknown |
| Europe / Germany / Berlin                     | Human | unknown |
| Europe / Germany / Berlin                     | Human | unknown |
| Europe / Germany / Berlin                     | Human | unknown |
| Europe / Germany / Berlin                     | Human | unknown |
| Europe / Germany / Berlin                     | Human | unknown |
| Europe / Germany / Berlin                     | Human | unknown |
| Europe / Germany / Berlin                     | Human | unknown |
| South America / Peru / Lima                   | Human | Female  |
| North America / USA / Virginia                | Human | unknown |
| Europe / United Kingdom / England             | Human | unknown |
| Europe / United Kingdom / England             | Human | unknown |
| Europe / United Kingdom / England             | Human | unknown |
| Europe / United Kingdom / England             | Human | unknown |
| Europe / United Kingdom / England             | Human | unknown |
| Europe / United Kingdom / England             | Human | unknown |
| Europe / United Kingdom / England             | Human | unknown |
| Europe / United Kingdom / England             | Human | unknown |
| Europe / United Kingdom / England             | Human | unknown |
| Europe / United Kingdom / England             | Human | unknown |
| North America / USA / Minnesota               | Human | unknown |
| North America / USA / Minnesota               | Human | unknown |
| North America / USA / Minnesota               | Human | unknown |
| Asia / United Arab Emirates                   | Human | Male    |
| Asia / United Arab Emirates                   | Human | Male    |
| Asia / United Arab Emirates                   | Human | Male    |
| Europe / Netherlands / Zuid Holland           | Human | unknown |
| Europe / Moldova / Chisinau                   | Human | unknown |
| Europe / Moldova / Chisinau                   | Human | unknown |
| Europe / Russia / Saint Petersburg            | Human | Female  |
| Europe / Russia / Saint Petersburg            | Human | Female  |
| Europe / Russia / Saint Petersburg            | Human | Female  |
| Europe / Switzerland / Aargau                 | Human | Female  |
| Europe / Switzerland / Zurich                 | Human | Female  |
| Europe / United Kingdom / Scotland            | Human | unknown |
| Europe / United Kingdom / Scotland            | Human | unknown |
| Europe / United Kingdom / England             | Human | unknown |
| Europe / United Kingdom / England             | Human | unknown |
| North America / USA / Utah                    | Human | unknown |
| Europe / France / Auvergne-Rhône-Alpes / Lyon | Human | Male    |
| North America / USA / New York                | Human | Male    |
| North America / USA / Virginia                | Human | unknown |
| North America / USA / Minnesota               | Human | Female  |
| North America / USA / Minnesota               | Human | Female  |



|                                                  |       |         |
|--------------------------------------------------|-------|---------|
| North America / Canada / Quebec                  | Human | Female  |
| North America / Canada / Quebec                  | Human | Male    |
| North America / Canada / Quebec                  | Human | Male    |
| North America / Canada / Quebec                  | Human | Female  |
| North America / Canada / Quebec                  | Human | Male    |
| North America / Canada / Quebec                  | Human | Male    |
| North America / Canada / Quebec                  | Human | Female  |
| North America / Canada / Quebec                  | Human | Male    |
| North America / Canada / Quebec                  | Human | Male    |
| North America / Canada / Quebec                  | Human | Male    |
| North America / Canada / Quebec                  | Human | Male    |
| North America / Canada / Quebec                  | Human | Female  |
| South America / Peru / Callao                    | Human | Male    |
| South America / Peru / Lima                      | Human | Female  |
| South America / Peru / Lima                      | Human | Male    |
| South America / Peru / Ancash                    | Human | Male    |
| South America / Peru / Lima                      | Human | Male    |
| South America / Peru / Lima                      | Human | Male    |
| Europe / Spain / La Rioja / Logrono              | Human | unknown |
| Europe / Spain / La Rioja / Logrono              | Human | unknown |
| Europe / Spain / Comunitat Valenciana / Valencia | Human | Male    |
| North America / Canada / Ontario                 | Human | unknown |
| North America / Canada / Ontario                 | Human | unknown |
| Europe / United Kingdom / England                | Human | unknown |
| Europe / United Kingdom / England                | Human | unknown |
| Europe / United Kingdom / England                | Human | unknown |
| Europe / United Kingdom / England                | Human | unknown |
| Europe / United Kingdom / England                | Human | unknown |
| Europe / United Kingdom / England                | Human | unknown |
| Europe / United Kingdom / England                | Human | unknown |
| Europe / United Kingdom / England                | Human | unknown |
| Europe / United Kingdom / England                | Human | unknown |
| Europe / United Kingdom / England                | Human | unknown |
| Europe / United Kingdom / England                | Human | unknown |
| Europe / Spain / Comunitat Valenciana / Alzira   | Human | Female  |
| Europe / Spain / Aragon                          | Human | Male    |
| Europe / Spain / Aragon                          | Human | Female  |
| Europe / Spain / Aragon                          | Human | Male    |
| Europe / Spain / Castilla y Leon                 | Human | Female  |
| Europe / Spain / Catalunya                       | Human | Male    |
| Europe / Spain / Extremadura                     | Human | Female  |
| Europe / Spain / Extremadura                     | Human | Female  |
| North America / USA / Minnesota                  | Human | unknown |
| North America / USA / Minnesota                  | Human | unknown |
| Asia / Hong Kong                                 | Human | Male    |
| Asia / Hong Kong                                 | Human | Male    |

|                                                          |       |         |
|----------------------------------------------------------|-------|---------|
| Europe / United Kingdom / England                        | Human | unknown |
| Europe / Lithuania / Alytaus apskritis                   | Human | Female  |
| North America / USA / Texas / Houston                    | Human | unknown |
| North America / USA / Texas / Houston                    | Human | unknown |
| North America / USA / Texas / Houston                    | Human | unknown |
| North America / USA / Texas / Houston                    | Human | unknown |
| North America / USA / Texas / Houston                    | Human | unknown |
| North America / USA / Texas / Houston                    | Human | unknown |
| North America / USA / Texas / Houston                    | Human | unknown |
| Europe / Netherlands / Utrecht                           | Human | Female  |
| North America / USA / Wisconsin / Vernon County          | Human | unknown |
| Europe / Switzerland / Geneve                            | Human | Male    |
| Europe / Switzerland / Geneve                            | Human | Male    |
| Europe / Switzerland / Geneve                            | Human | Male    |
| Europe / Switzerland / Geneve                            | Human | Female  |
| Europe / Switzerland / Geneve                            | Human | Female  |
| Europe / Switzerland / Geneve                            | Human | Female  |
| Europe / Switzerland / Geneve                            | Human | Male    |
| Europe / Switzerland / Geneve                            | Human | Male    |
| Europe / Switzerland / Geneve                            | Human | Female  |
| Europe / Switzerland / Geneve                            | Human | Female  |
| North America / Canada / Ontario                         | Human | Female  |
| North America / USA / Florida                            | Human | unknown |
| North America / USA / Florida                            | Human | unknown |
| Europe / United Kingdom / England                        | Human | unknown |
| Europe / United Kingdom / England                        | Human | unknown |
| Europe / United Kingdom / England                        | Human | unknown |
| Europe / United Kingdom / England                        | Human | unknown |
| Europe / United Kingdom / England                        | Human | unknown |
| Europe / United Kingdom / Scotland                       | Human | unknown |
| Europe / France / Provence-Alpes-C?te-d?Azur / Marseille | Human | unknown |
| Europe / France / Provence-Alpes-C?te-d?Azur / Marseille | Human | unknown |
| Europe / France / Provence-Alpes-C?te-d?Azur / Marseille | Human | unknown |
| Europe / France / Provence-Alpes-C?te-d?Azur / Marseille | Human | unknown |
| Europe / France / Provence-Alpes-C?te-d?Azur / Marseille | Human | unknown |
| Europe / France / Provence-Alpes-C?te-d?Azur / Marseille | Human | unknown |
| Europe / Russia / Omsk / Omsk                            | Human | Female  |
| Europe / Russia / Omsk / Omsk                            | Human | Male    |
| Europe / Russia / Omsk / Omsk                            | Human | Male    |
| Europe / Russia / Omsk / Omsk                            | Human | Female  |
| Europe / Russia / Omsk / Omsk                            | Human | Female  |
| Europe / Russia / Omsk / Omsk                            | Human | Female  |
| Europe / Russia / Omsk / Omsk                            | Human | Female  |
| Europe / Russia / Omsk / Omsk                            | Human | Female  |
| Europe / Russia / Omsk / Omsk                            | Human | Male    |
| Europe / Russia / Omsk / Azovo                           | Human | Female  |

|                                                   |       |         |
|---------------------------------------------------|-------|---------|
| Europe / Russia / Omsk / Azovo                    | Human | Male    |
| Europe / Russia / Omsk / Omsk                     | Human | Female  |
| Europe / Russia / Omsk / Novovarshavka            | Human | Female  |
| Europe / Russia / Omsk / Omsk                     | Human | Female  |
| Europe / Russia / Omsk / Omsk                     | Human | Male    |
| Europe / Russia / Omsk / Omsk                     | Human | Male    |
| Europe / Russia / Omsk / Omsk                     | Human | unknown |
| Europe / Russia / Omsk / Omsk                     | Human | Female  |
| Europe / Russia / Omsk / Omsk                     | Human | Female  |
| Europe / Russia / Omsk / Omsk                     | Human | unknown |
| Europe / Russia / Omsk / Omsk                     | Human | Female  |
| Europe / Russia / Omsk / Omsk                     | Human | Male    |
| Europe / Russia / Omsk / Omsk                     | Human | Male    |
| Europe / Russia / Omsk / Omsk                     | Human | Male    |
| North America / USA / Hawaii                      | Human | Male    |
| North America / USA / Arizona                     | Human | Male    |
| North America / USA / Michigan                    | Human | Female  |
| North America / USA / Nevada                      | Human | Male    |
| North America / USA / California                  | Human | Female  |
| North America / USA / Louisiana                   | Human | Female  |
| North America / USA / California                  | Human | Male    |
| North America / USA / Pennsylvania                | Human | Male    |
| Europe / United Kingdom / England                 | Human | unknown |
| Europe / United Kingdom / England                 | Human | unknown |
| Asia / Singapore                                  | Human | Male    |
| Asia / Singapore                                  | Human | Male    |
| Asia / Singapore                                  | Human | Male    |
| Asia / Singapore                                  | Human | Male    |
| Europe / Switzerland / Bern                       | Human | unknown |
| Europe / Switzerland / Ticino                     | Human | unknown |
| Europe / United Kingdom / England                 | Human | unknown |
| Europe / United Kingdom / England                 | Human | unknown |
| North America / USA / Wisconsin / Walworth County | Human | unknown |
| Oceania / New Zealand / Canterbury                | Human | Female  |
| Oceania / New Zealand / Auckland                  | Human | Male    |
| Oceania / New Zealand / Southern                  | Human | Female  |
| Oceania / New Zealand / Counties Manukau          | Human | Female  |
| Oceania / New Zealand / Canterbury                | Human | Female  |
| Europe / United Kingdom / England                 | Human | unknown |
| Europe / United Kingdom / England                 | Human | unknown |
| Europe / United Kingdom / England                 | Human | unknown |
| Europe / Germany / Baden-Württemberg / Tübingen   | Human | unknown |
| Europe / Austria / Nauders                        | Human | Male    |
| Europe / Austria                                  | Human | Male    |
| Europe / United Kingdom / England                 | Human | unknown |

|                                            |       |         |
|--------------------------------------------|-------|---------|
| Europe / United Kingdom / Northern Ireland | Human | unknown |
| Europe / United Kingdom / Northern Ireland | Human | unknown |
| Europe / United Kingdom / Northern Ireland | Human | unknown |
| Europe / United Kingdom / Northern Ireland | Human | unknown |
| Europe / United Kingdom / Northern Ireland | Human | unknown |
| Europe / United Kingdom / Northern Ireland | Human | unknown |
| Europe / United Kingdom / Northern Ireland | Human | unknown |
| Europe / United Kingdom / Northern Ireland | Human | unknown |
| North America / Canada / Ontario / Toronto | Human | unknown |
| North America / Canada / Ontario / Toronto | Human | unknown |
| North America / Canada / Ontario / Toronto | Human | unknown |
| North America / Canada / Ontario / Toronto | Human | unknown |
| North America / Canada / Ontario / Toronto | Human | unknown |
| Europe / United Kingdom / England          | Human | unknown |
| Europe / United Kingdom / England          | Human | unknown |
| Europe / United Kingdom / England          | Human | unknown |
| Europe / United Kingdom / England          | Human | unknown |
| Europe / United Kingdom / England          | Human | unknown |
| Europe / United Kingdom / England          | Human | unknown |
| Europe / United Kingdom / England          | Human | unknown |
| Europe / United Kingdom / England          | Human | unknown |
| Europe / Switzerland / Zurich              | Human | unknown |
| North America / Canada / Ontario / Toronto | Human | unknown |
| North America / Canada / Ontario / Toronto | Human | unknown |
| Asia / Japan                               | Human | unknown |
| Asia / Japan                               | Human | unknown |
| Europe / Switzerland / Geneve              | Human | Male    |



| <b>Patient age</b> | <b>Lineage</b> |
|--------------------|----------------|
| 44                 | B              |
| unknown            | B.1.1          |
| 61                 | B.1            |
| 35                 | B.1.1          |
| 27                 | B.1.1          |
| unknown            | B.1            |
| unknown            | B.1.1          |
| unknown            | B.1.1          |
| unknown            | B.1.1          |
| unknown            | B.1            |
| 59                 | B.1.1          |
| 60                 | B.1.1          |
| 70                 | B.1            |
| 25                 | B.1            |
| 46                 | B.1.1          |
| 69                 | B.1            |
| 37                 | B.1            |
| 13                 | B.1.1          |
| 55                 | B.1            |
| 27                 | B.1            |
| unknown            | B.1.1          |
| unknown            | B.1.1          |
| unknown            | B.1.1          |
| unknown            | B.1            |
| unknown            | B.1.1          |
| 82                 | B.1            |
| 65                 | B.1            |
| 88                 | B.1            |
| 43                 | B.1.1          |
| 46                 | B.1.1          |
| unknown            | B.1.1          |
| unknown            | B.1.1          |
| unknown            | B.1.1          |
| unknown            | B.1.1          |
| unknown            | B.1.1          |
| unknown            | B.1.1          |
| 31                 | B.1            |
| 22                 | B.1.1          |
| 36                 | B.2            |
| 25                 | B              |
| 22                 | B.1.1          |
| 37                 | B.1            |
| 21                 | B.1            |
| 58                 | B.2.1          |

|         |          |
|---------|----------|
| 50      | B.1.1    |
| 27      | B.1.1    |
| 64      | B.1.1    |
| 19      | B.1.1    |
| 49      | B.1      |
| 62      | B.1      |
| unknown | B.1.1    |
| unknown | B.1.1    |
| unknown | B.1.1    |
| 33      | B.1.1    |
| n/a     | B.1      |
| unknown | B.1      |
| unknown | B.1      |
| 39      | B.1.1    |
| 36      | B.1      |
| 58      | B.1      |
| 60      | B.1      |
| 38      | B.1      |
| 39      | B.1      |
| 40      | B.1.1    |
| 55      | B.1.1    |
| 47      | B.1.1.35 |
| 59      | B.1.1    |
| 30      | B.1.1    |
| 73      | B.1.1    |
| unknown | B.1.1    |
| 55      | B.1.1    |
| 51      | B.1      |
| 20      | B.1.1    |
| 11      | B.1.1    |
| 51      | B.1.1    |
| unknown | B.1.1    |
| 48      | B.1      |
| 27      | B.1.1    |
| 38      | B.1      |
| 22      | B.1      |
| 56      | B.1.1    |
| 52      | B.1      |
| 50      | B.1      |
| 26      | B.1.1    |
| 61      | B.1.1    |
| 48      | B.1      |
| 35      | B.1      |
| 54      | B.1.1    |
| 51      | B.1.1    |

|         |       |
|---------|-------|
| 53      | B.1   |
| 19      | B.1   |
| 53      | B.1.1 |
| 48      | B.1.1 |
| 57      | B.1   |
| 60      | B.1.1 |
| 14      | B.1.1 |
| unknown | B.1.1 |
| 29      | B.1.1 |
| unknown | B.1.1 |
| 31      | B.1.1 |
| 45-49   | B.1   |
| 20-24   | B.1.1 |
| 20-24   | B.1.1 |
| 55-59   | B.1.1 |
| 65-69   | B.1.1 |
| 25-29   | B.1.1 |
| 61      | B.1.1 |
| 39      | B.1.1 |
| 50      | B.1.1 |
| 45      | B.1   |
| 24      | B.1   |
| 25      | B.1   |
| 24      | B.1.1 |
| 74      | B.1   |
| unknown | B.1.1 |
| 9       | B.1   |
| 52      | B.1.1 |
| 34      | A.2   |
| >70     | B.1.1 |
| 60      | B.1.1 |
| >70     | B.1.1 |
| >50     | B.1.1 |
| >50     | B.1.1 |
| >50     | B.1.1 |
| 28      | B.1.1 |
| 15      | B.1.1 |
| 75      | B.1   |
| 40      | B.1   |
| unknown | B.1   |
| 62      | B.1.1 |
| 57      | B.1   |
| 33      | B.1   |
| 46      | B.1   |
| 32      | B.1   |

|         |          |
|---------|----------|
| 49      | B.1.1    |
| 41      | B.1      |
| 67      | B.1      |
| 51      | B.1      |
| 64      | B.1.1    |
| 69      | B.1      |
| 29      | B.1.1    |
| 57      | B.1      |
| 54      | B.1      |
| 19      | B.1.1    |
| 55      | B.1.1    |
| 33      | B.1.1    |
| 36      | B.1.1    |
| 25      | B.1.1    |
| 37      | B.1.1    |
| 54      | B.1.1    |
| 76      | B.1      |
| 69      | B.1      |
| 49      | B.1.1    |
| unknown | B.1      |
| 30      | B.1.1    |
| 24      | B.1.1    |
| unknown | B.1      |
| 33      | B.1.1    |
| 39      | B.1.1    |
| 59      | B.1.1    |
| 25      | B.1.1    |
| 54      | B.1.1    |
| 53      | B.1      |
| 73      | B.1.1    |
| 77      | B.1.1.71 |
| 68      | B.1      |
| 47      | B.1.1    |
| 51      | B.1.1    |
| 59      | B.1      |
| 67      | B.1.1    |
| 35      | B.1.1    |
| 78      | B.1.1    |
| 37      | B.1.1    |
| 29      | B.1      |
| 45      | B.1      |
| 45      | B.1.1    |
| 53      | B.2.1    |
| 65      | B.1.1    |
| 70      | B.1.1    |

|         |          |
|---------|----------|
| unknown | B.1.1    |
| 21      | B.1.1    |
| 49      | B.1.1    |
| 53      | B.1      |
| 49      | B.1.1    |
| 37      | B.1.1    |
| 55      | B.1      |
| 25      | B.1      |
| 44      | B.1      |
| 61      | B.1.1    |
| 74      | B.1.1    |
| 70      | B.1      |
| 46      | B.1.1    |
| 25      | B.1      |
| 0       | B.1      |
| 55      | B.1      |
| 40      | B.1.1    |
| 26      | B.1.1    |
| 54      | B.1      |
| 74      | B.1      |
| 81      | B.1      |
| 42      | B.1      |
| 29      | B.1.1    |
| 51      | B.1.1    |
| 51      | B.1.1    |
| unknown | B.1.1.71 |
| 83      | B.1.1    |
| 83      | B.1.1    |
| 85      | B.1.1    |
| 95      | B.1.1    |
| 62      | B.1.1    |
| 78      | B.1.1    |
| 47      | B.1.1    |
| 59      | B.1.1    |
| 61      | B.1      |
| 33      | B.1.1    |
| 77      | B.1.1    |
| 73      | B.1.1    |
| 25      | B.1      |
| 26      | B.1      |
| unknown | B.1      |
| 32      | B.1.1    |
| 57      | B.1.1    |
| 70      | B.1.1    |
| unknown | B.1.1    |

|         |          |
|---------|----------|
| unknown | B.1.1    |
| 70      | B.1      |
| unknown | B.1      |
| 69      | B.1      |
| 71      | B.1      |
| unknown | B.1      |
| 56      | B.1      |
| 53      | B.1.1.55 |
| unknown | B.1      |
| 85      | B.1.1    |
| 86      | B.1.1    |
| 53      | B.1.1    |
| 75      | B.1.1    |
| 49      | B.1      |
| 44      | B.1.1    |
| 63      | B.1.1    |
| unknown | B.1      |
| 29      | B.1.1    |
| 42      | B.1.1    |
| unknown | B.1      |
| unknown | B.1      |
| 17      | B.1.1    |
| 37      | B.1.1    |
| 44      | B.1      |
| 25      | B.1.1    |
| 37      | B.1      |
| 20      | B.1.1    |
| 20      | B.1      |
| unknown | B.1.1    |
| unknown | B.1      |
| unknown | B.1      |
| 38      | B.1.1    |
| 28      | B.1      |
| 55      | B.1      |
| 84      | B.1      |
| 64      | B.1      |
| 29      | B.1.1    |
| 37      | B.1      |
| 62      | B.1      |
| unknown | B.1.1    |
| 51      | B.1.1    |
| 56      | B.1.1    |
| 18      | B.1.1    |
| unknown | B.1      |
| unknown | B.1      |

|         |          |
|---------|----------|
| unknown | B.1      |
| 71      | B.1      |
| 58      | B.1.1    |
| 73      | B.1      |
| 55      | B.1      |
| 33      | B.1      |
| 87      | B.1      |
| 73      | B.1      |
| 36      | B.1      |
| 44      | B.1.1    |
| 52      | B.1      |
| 43      | B.1.1    |
| 35      | B.1.1    |
| 16      | B.1.1    |
| 36      | B.1.1    |
| 35      | B.1      |
| 22      | B.1      |
| 37      | B.1.1    |
| 26      | B.1.1    |
| 31      | B.1.1    |
| 57      | B.1      |
| 25      | B.1.1    |
| 26      | B.1.1    |
| 66      | B.1.1    |
| 30      | B.1      |
| 25      | B.1.1    |
| 16      | B.1.1    |
| 37      | B.1.1    |
| 58      | B.1      |
| unknown | B.1      |
| unknown | B.1      |
| 49      | B        |
| 49      | B        |
| 30      | B.1.1    |
| 25      | B.1.1    |
| 56      | B.1.1    |
| 51      | B.1.1    |
| 37      | B.1.1    |
| 16      | B        |
| 30      | B.1.142  |
| unknown | B.1.1    |
| unknown | B.1.1.35 |
| unknown | B.1.1    |
| unknown | B.1      |
| unknown | B.1.1    |





|         |       |
|---------|-------|
| unknown | B.1.1 |
| unknown | B.1.1 |
| unknown | B.1.1 |
| unknown | B.1.1 |
| unknown | B.1.1 |
| unknown | B.1.1 |
| unknown | B.1.1 |
| unknown | B.1.1 |
| unknown | B.1.1 |
| unknown | B.1.1 |
| 88      | B.1   |
| unknown | B.1.1 |
| unknown | B.1.1 |
| 45      | B.1   |
| 51      | B.1   |
| 15      | B.1   |
| 29      | B.1   |
| 40      | B.1.1 |
| 69      | B.1   |
| unknown | B.1.1 |
| unknown | B.1.1 |
| unknown | B.1.1 |
| 27      | B.1.1 |
| 64      | B.1.1 |
| 50      | B.1.1 |
| 70      | B.1.1 |
| 29      | B.1.1 |
| 43      | B.1.1 |
| 42      | B.1   |
| 72      | B.1.1 |
| 75      | B.1.1 |
| 52      | B.1   |
| 76      | B.1.1 |
| 81      | B.1   |
| 54      | B.1.5 |
| 40      | B.1   |
| unknown | B.1   |
| unknown | B.1   |
| unknown | B.1   |
| unknown | B.1   |
| unknown | B.1   |
| unknown | B.1   |
| unknown | B.1.1 |
| 65      | B.1   |
| 22      | B.1.1 |

|         |       |
|---------|-------|
| 63      | B.1.1 |
| 30      | B.1.1 |
| 24      | B.1.1 |
| 47      | B.1   |
| 60      | B.1.5 |
| 50      | B.1.1 |
| 68      | B.1   |
| 63      | B.1   |
| 49      | B.1.1 |
| 62      | B.1.1 |
| 66      | B.1.1 |
| unknown | B.1   |
| 23      | B.1   |
| 45      | B.1.1 |
| 55      | B.1.1 |
| unknown | B.1   |
| unknown | B.1   |
| unknown | B.1   |
| 27      | B.1.1 |
| 56      | B.1.1 |
| 39      | B.1.1 |
| 48      | B.1.1 |
| unknown | B.1   |
| unknown | B.1   |
| unknown | B.1   |
| unknown | B.1.1 |
| unknown | B.1.1 |
| unknown | B.1.1 |
| unknown | B.1.1 |
| unknown | B.1.1 |
| unknown | B.1.1 |
| unknown | B.1.1 |
| unknown | B.1.1 |
| unknown | B.1.1 |
| unknown | B.1.1 |
| unknown | B.1.1 |
| unknown | B.1.1 |
| unknown | B.1.1 |
| unknown | B.1.1 |
| unknown | B.1.1 |
| unknown | B.1.1 |
| unknown | B.1   |
| 29      | B.1.1 |

|         |        |
|---------|--------|
| 51      | B.1.1  |
| 25      | B.1.1  |
| unknown | B.1.1  |
| unknown | B.1    |
| unknown | B.1.1  |
| unknown | B.1    |
| 55      | B.1    |
| 32      | B.1    |
| 33      | B.1    |
| 43      | B.1.1  |
| unknown | B.1.1  |
| 41      | B.1    |
| 29      | B.1    |
| 37      | B.1    |
| 34      | B.1.1  |
| 20      | B.1    |
| 48      | B.1    |
| 29      | B.1    |
| 42      | B.1.98 |
| 64      | B.1.1  |
| 50      | B.1    |
| 21      | B.1.1  |
| 69      | B.1.1  |
| 22      | B.1    |
| 22      | B.1    |
| 29      | B.1    |
| 29      | B.1    |
| 64      | B.1    |
| unknown | B.1.1  |
| unknown | B.1    |
| unknown | B.1.1  |
| unknown | B.1.1  |
| unknown | B.1.1  |
| 65      | B.1    |
| 49      | B.1    |
| unknown | B.1.1  |
| 80      | B.1    |
| 84      | B.1.1  |
| 42      | B.1    |
| 47      | B.1    |
| 39      | B.1    |
| unknown | B.1.1  |
| unknown | B.1.1  |
| unknown | B.1.1  |
| unknown | B.1.1  |



|         |          |
|---------|----------|
| unknown | B.1      |
| unknown | B.1      |
| unknown | B.1      |
| unknown | B.1      |
| unknown | B.1      |
| unknown | B.1      |
| unknown | B.1      |
| 32      | B.1.1    |
| 60      | B.1      |
| 84      | B.1.1    |
| 61      | B.1.1    |
| unknown | B        |
| 37      | B.1.1    |
| 51      | B.1.1    |
| 56      | B.1.1    |
| 54      | B.1      |
| unknown | B.1      |
| 74      | B.1.1    |
| 54      | B.1.1    |
| 60      | B.1.1    |
| 79      | B.1      |
| 44      | B.1      |
| unknown | B.1.1    |
| unknown | B.1.1    |
| 43      | B.1      |
| unknown | B.1.1    |
| 33      | B.1.1    |
| 35      | B.1.1    |
| 32      | B.1.1    |
| unknown | B.1.1    |
| unknown | B.1      |
| 20      | B        |
| 59      | B.2.1    |
| unknown | GR       |
| unknown | GR       |
| unknown | GR       |
| unknown | B.1.1    |
| unknown | B.1.1    |
| unknown | B.1.1    |
| 45      | B.1.1    |
| 55      | B.1.1.35 |
| 30      | B.1.1    |
| 52      | B.1      |
| 14      | B.1.5    |



|         |          |
|---------|----------|
| 48      | B.1.1    |
| 48      | B.1.1    |
| 48      | B.1.1    |
| 76      | B.1      |
| 47      | B.1.1    |
| 15      | B.1.1    |
| 17      | B.1      |
| 44      | B.1.1    |
| 43      | B.1      |
| unknown | B.1.1    |
| unknown | B.1.1    |
| unknown | B.1      |
| unknown | B.1      |
| unknown | B.1      |
| 23      | B.1.1    |
| 74      | B.1.1.35 |
| 49      | B.1.1    |
| 56      | B.1.1    |
| 44      | B.1.1    |
| 59      | B.1.1    |
| 10      | B.1.1    |
| 45      | B.1.1    |
| 49      | B.1.1    |
| 43      | B.1.1    |
| 48      | B.1      |
| 11      | B.1.1    |
| 61      | B.1.1    |
| 15      | B.1.1    |
| unknown | B.2.1    |
| unknown | B.2.1    |
| unknown | B.1.1.71 |
| 62      | B.1      |
| 37      | B.1      |
| 57      | B.1.1    |
| 73      | B.1.1    |
| 65      | B.1      |
| 58      | B.1      |
| 57      | B.1      |
| unknown | B        |
| 20      | B.1      |
| 47      | B.1.1    |
| 33      | B.1.1    |
| 60      | B.1.1    |
| 47      | B.1      |
| 51      | B.1.1    |

|         |       |
|---------|-------|
| 49      | B.1.1 |
| 40      | B.1.1 |
| 48      | B.1.1 |
| 62      | B.1.1 |
| 14      | B.1   |
| 63      | B.1.1 |
| 18      | B.1.1 |
| 45      | B.1.1 |
| 15      | B.1   |
| 47      | B.1   |
| 8       | B.1.1 |
| 18      | B.1.1 |
| 49      | B.1.1 |
| 46      | B.1.1 |
| 47      | B.1.1 |
| 53      | B.1.1 |
| 48      | B.1.1 |
| 46      | B.1.1 |
| 46      | B.1.1 |
| 40      | B.1   |
| 60      | B.1.1 |
| 30      | B.1   |
| 28      | B.1   |
| 17      | B.1   |
| 47      | B.1.1 |
| 66      | B.1   |
| 51      | B.1   |
| unknown | B.1.1 |
| unknown | B.1.1 |
| unknown | B.1.1 |
| unknown | B.1.1 |
| 50      | A.2.2 |
| unknown | B.1.1 |
| unknown | B.1.1 |
| unknown | B.1.1 |
| unknown | B.1.1 |
| unknown | B.1.1 |
| unknown | B.1.1 |
| unknown | B.1.1 |
| unknown | B.1.1 |
| unknown | B.1.1 |
| unknown | B.1   |
| unknown | B.1.1 |
| 53      | B.2.1 |
| 41      | B.1   |



|         |          |
|---------|----------|
| 21      | B.1.1    |
| 82      | B.1.1    |
| unknown | B.1.1    |
| unknown | B.1.1    |
| unknown | B.1.1    |
| unknown | B.1      |
| unknown | B.1.1    |
| 83      | B.1      |
| 56      | B.1.1    |
| unknown | B.1.1    |
| unknown | B.1      |
| unknown | B.1      |
| unknown | B.1      |
| unknown | B.1      |
| unknown | B.1      |
| unknown | B.1      |
| unknown | B.1.1    |
| unknown | B.1      |
| unknown | B.1.1    |
| unknown | B.1.1    |
| 36      | B.1.1    |
| 51      | B.1.1    |
| 39      | B.1.1    |
| unknown | B.1      |
| 59      | B.1.1    |
| 20      | B.1.1    |
| 38      | B.1.1    |
| 48      | B.1      |
| 28      | B.1      |
| 25      | B.1.1    |
| 22      | B.1.1    |
| 28      | B.1.1.71 |
| 83      | B.1.1    |
| 84      | B.1.1    |
| 59      | B.1.1    |
| 54      | B.1.1.35 |
| 15      | B.1.1    |
| 64      | B.1.1.35 |
| 57      | B.1.1    |
| 66      | B.1.1    |
| 66      | B.1.1    |
| 87      | B.1.1    |
| 43      | B.1.1    |
| 78      | B.1      |
| 45      | B.1.1    |

|         |          |
|---------|----------|
| 80      | B.1.1    |
| 71      | B.1.1    |
| 54      | B.1.1    |
| 83      | B.1.1    |
| 92      | B.1.1    |
| 38      | B.1.1    |
| unknown | B.1      |
| 26      | B.1      |
| 67      | B.1      |
| 43      | B.1.1    |
| 45      | B.1      |
| 40      | B.1      |
| 83      | B.1      |
| unknown | B.1.1    |
| unknown | B.1.1    |
| 91      | B.1      |
| 78      | B.1      |
| 86      | B.1      |
| 78      | B.1      |
| 82      | B.1      |
| 70      | B.1      |
| 64      | B.1      |
| unknown | B.1      |
| 59      | B.1      |
| unknown | B.1.1    |
| unknown | B.1      |
| unknown | B.1      |
| unknown | B.1      |
| unknown | B.1.1    |
| 27      | B.1.1    |
| 42      | B.1      |
| 22      | B.1      |
| 42      | B.1      |
| 60      | B.1      |
| 29      | B.1.1    |
| unknown | B        |
| unknown | B.1.1    |
| 46      | B.1.1    |
| 49      | B.1.1    |
| 94      | B.1.1    |
| 15      | B.1.1    |
| 32      | B.1.1    |
| 23      | B.1      |
| 38      | B.1.1.35 |
| 48      | B.1      |

|         |          |
|---------|----------|
| unknown | B.1.1    |
| unknown | B.1.1    |
| unknown | B.1.1    |
| unknown | B.1.1    |
| unknown | B.1.1    |
| 72      | B.1      |
| 24      | B.1.1    |
| 54      | B.1.1    |
| unknown | B.1.1    |
| unknown | B.1.1    |
| unknown | B.1.1    |
| unknown | B.1.1    |
| unknown | B.1.1    |
| unknown | B.1      |
| unknown | B.1      |
| unknown | B.1.1    |
| unknown | B.1.1    |
| unknown | B.1.1    |
| unknown | B.1.1    |
| 36      | B.1      |
| 87      | B.1.1    |
| 32      | B.1.1    |
| 30      | B.1.1.35 |
| 90      | B.1.1    |
| 75      | B.1.1    |
| 72      | B.1.1    |
| 30      | B.1.1    |
| 79      | B.1      |
| 75      | B.1      |
| 78      | B.1.1    |
| 21      | B.1      |
| 48      | B.1.1    |
| 41      | B.1      |
| 36      | B.1.1    |
| 44      | B.1      |
| 27      | B.1      |
| unknown | B.1      |
| 85      | B.1.1    |
| unknown | B.1      |
| 45      | B.1      |
| 66      | B.1      |
| unknown | B.1.1    |
| unknown | B.1.1    |
| unknown | B.1.1    |
| unknown | B.1.1    |

|         |          |
|---------|----------|
| 19      | B.1.1    |
| unknown | B.1      |
| unknown | B.1.1    |
| unknown | B.1.1.35 |
| unknown | B.1.1    |
| unknown | B.1.1    |
| unknown | B.1.1    |
| unknown | B.1.1    |
| unknown | B.1.1    |
| unknown | B.1      |
| unknown | B.1      |
| unknown | B.1.1    |
| unknown | B.1.1    |
| unknown | B.1.1    |
| unknown | B.1.1.64 |
| unknown | B.1      |
| unknown | B.1.1    |
| unknown | B.1.1    |
| unknown | B.1.1    |
| unknown | B.1      |
| unknown | B.1      |
| unknown | B.1      |
| 42      | B.1      |
| 23      | B.1      |
| 70      | B.1.1    |
| 52      | B.1      |
| 5       | B.1.1    |
| unknown | B.1.1    |
| unknown | B.1.1    |
| unknown | B.1.1    |
| unknown | B.1.1    |
| unknown | B.1.1    |
| unknown | B.1.1    |
| unknown | B.1      |
| unknown | B.1      |
| unknown | B.1      |
| unknown | B.1      |
| unknown | B.1      |
| unknown | B.1      |
| unknown | B.1.1    |
| unknown | B.1.1    |
| unknown | B.1      |
| 12      | B        |
| unknown | B.1.1    |
| unknown | B.1.1    |

|         |          |
|---------|----------|
| unknown | B.1      |
| unknown | B.1      |
| unknown | B.1      |
| unknown | B.1.1    |
| unknown | B.1.1    |
| 82      | B.1.1    |
| 63      | B.1      |
| 48      | B.1      |
| unknown | B.1      |
| unknown | B.1.1    |
| unknown | B.1.1    |
| 30      | B.1.1    |
| unknown | B.1      |
| 54      | B.1.1    |
| unknown | B.1.1    |
| unknown | B.1.1    |
| unknown | B.1.1    |
| unknown | B.1.1    |
| unknown | B.1.1    |
| unknown | B.1.1    |
| unknown | B.1.1    |
| unknown | B.1.1.1  |
| unknown | B.1.1    |
| unknown | B.1.1    |
| unknown | B.1.1    |
| unknown | B.1.1    |
| unknown | B.1.1    |
| unknown | B.1.1    |
| unknown | B.1.156  |
| unknown | B.1.1    |
| unknown | B.1.1    |
| unknown | B.1.1    |
| 31      | B.1.1    |
| 44      | B.1.1.26 |
| 60      | B.1.1    |
| unknown | B.1      |
| 52      | B.1      |
| 40      | B.1      |
| 43      | B.1.1    |
| 41      | B.1      |
| 36      | B.1.1.35 |
| 45      | B.1.1.33 |
| unknown | B.1.1    |
| unknown | B.1      |
| unknown | B.1      |
| unknown | B.1.1    |

|         |          |
|---------|----------|
| unknown | B.1.1    |
| unknown | B.1.1    |
| unknown | B.1.1    |
| unknown | B.1.1    |
| unknown | B.1.1    |
| unknown | B.1.1    |
| unknown | B.1.1    |
| unknown | B.1      |
| unknown | B.1      |
| unknown | B.1      |
| unknown | B.1      |
| unknown | B.1.1    |
| unknown | B.1      |
| unknown | B.1      |
| 36      | B.1.1    |
| unknown | B.1      |
| unknown | B.1      |
| unknown | B.1      |
| unknown | B.1      |
| 45      | B.1      |
| 76      | B.1      |
| unknown | B.1      |
| unknown | B.1      |
| unknown | B.1      |
| 52      | B.1      |
| unknown | B.1      |
| unknown | B.1.1    |
| unknown | B.1.1    |
| 62      | B.2      |
| 20      | B.1.1    |
| 41      | B.1.1    |
| 37      | B.1.1    |
| 26      | B.1.1    |
| 50      | B.1.1.25 |
| unknown | B.1.1    |
| unknown | B.1.1    |
| unknown | B.1.1    |
| unknown | B.1      |
| unknown | B.1      |
| unknown | B.1.1    |
| unknown | B.1      |
| unknown | B.1.1    |
| unknown | B.1      |
| unknown | B.1.1    |
| 52      | B.1.1    |

|         |          |
|---------|----------|
| 45      | B.1.1    |
| 27      | B.1.1    |
| unknown | B.1      |
| unknown | B.1      |
| unknown | B.1      |
| unknown | B.1.1    |
| unknown | B.1.1    |
| unknown | B.1.1    |
| 70      | B.1.1.25 |
| 24      | B.1.1    |
| 23      | B.1.1    |
| 23      | B.1.1    |
| unknown | B.1.1    |
| unknown | B.1.1    |
| unknown | B.1.1    |
| unknown | B.1.1    |
| unknown | B.1.1    |
| unknown | B.1.1    |
| unknown | B.1.1    |
| unknown | B.1.1    |
| unknown | B.1.1    |
| unknown | B.1.1    |
| unknown | B.1      |
| unknown | B.1      |
| unknown | B.1      |
| unknown | B.1.1    |
| unknown | B.1.1    |
| 60      | B.1.1    |
| 38      | B.1.1    |
| 56      | B.1.1    |
| 22      | B.1.1    |
| 27      | B.1.1    |
| 57      | B.1.1    |
| 52      | B.1.1    |
| 64      | B.1.1    |
| 54      | B.1.1    |
| 16      | B.1.1    |
| 39      | B.1.1    |
| 1       | B.1.1    |
| 2       | B.1.1    |
| 43      | B.1.1    |
| 3       | B.1.1    |
| unknown | B.1.1    |
| unknown | B.1.1    |
| 60      | B.1.1    |

|         |         |
|---------|---------|
| 56      | B.1.1   |
| unknown | B.1.1   |
| 60      | B.1.1   |
| 58      | B.1.1   |
| unknown | B.1     |
| unknown | B.1     |
| unknown | B.1     |
| 36      | B.1     |
| 48      | B.1.136 |
| 71      | B.1     |
| 21      | B.1     |
| 71      | B.1     |
| 37      | B.1     |
| unknown | B.1.1   |
| unknown | B.1.1   |
| 89      | B.1.1   |
| 52      | B.1     |
| 29      | B.1     |
| 51      | B.1.1   |
| 30      | C.1     |
| 84      | B.1     |
| 65      | B.1     |
| 30      | B.1     |
| 32      | B.1     |
| unknown | B.1     |
| 43      | B.1     |
| 27      | B.1.1   |
| 87      | B.1     |
| 71      | B.1     |
| 53      | B.1     |
| 29      | B.1     |
| 85      | B.1     |
| 100     | B.1     |
| 81      | B.1     |
| 89      | B.1     |
| 43      | B.1.1   |
| 93      | B.1.1   |
| 57      | B.1.1   |
| 60      | B.1.1   |
| 24      | B.1.1   |
| 34      | B.1.1   |
| unknown | B.1.1   |
| unknown | B.1.1   |
| unknown | B.1.1   |
| unknown | B.1.1   |





|         |        |
|---------|--------|
| unknown | B.1.1  |
| unknown | B.1.1  |
| unknown | B.1    |
| unknown | B.1.1  |
| unknown | B.1.1  |
| unknown | B.1.1  |
| unknown | B.1.1  |
| unknown | B.1.1  |
| unknown | B.1    |
| unknown | B.1    |
| unknown | B.1.1  |
| unknown | B.1.1  |
| unknown | B.1.1  |
| unknown | B.1.1  |
| unknown | B.1.1  |
| unknown | B.1.1  |
| unknown | B.1.91 |
| unknown | B.1.1  |
| unknown | B.1.1  |
| unknown | B.1.1  |
| unknown | B.1    |
| 61      | B.1.1  |
| 43      | B.1.1  |
| unknown | B.1.1  |
| 66      | B.1.1  |
| 53      | B.1.1  |
| 54      | B.1.1  |
| 45      | B.1    |
| 45      | B.1.1  |
| 57      | B.1.1  |
| 40      | B.1    |
| 27      | B.1.1  |
| 68      | B.1.1  |
| 69      | B.1.1  |
| 30      | B.1    |
| 64      | B.1    |
| 37      | B.1    |
| 25      | B.1.36 |
| unknown | B.1.1  |
| unknown | B.1.1  |
| unknown | B.1.5  |
| unknown | B.1    |
| unknown | B.1    |
| unknown | B.1.1  |
| unknown | B.1    |
| unknown | B.1    |

|         |       |
|---------|-------|
| unknown | B.1   |
| unknown | B.1   |
| unknown | B.1   |
| unknown | B.1   |
| unknown | B.1   |
| unknown | B.1   |
| unknown | B.1   |
| unknown | B.1   |
| unknown | B.1   |
| unknown | B.1   |
| 40      | B.1   |
| unknown | B.1   |
| unknown | B.1.1 |
| unknown | B.1.1 |
| unknown | B.1.1 |
| unknown | B.1.1 |
| unknown | B.1.1 |
| unknown | B.1.1 |
| unknown | B.1   |
| unknown | B.1.1 |
| unknown | B.1.1 |
| unknown | B.1   |
| unknown | B.1   |
| unknown | B.1   |
| 76      | B.1.1 |
| 27      | B.1   |
| 48      | B.1.1 |
| unknown | B.1.1 |
| unknown | B.1   |
| unknown | B.1   |
| 39      | B.1.1 |
| 65      | B.1.1 |
| 55      | B.1.1 |
| 27      | B.1.1 |
| 36      | B.1.1 |
| unknown | B.1.1 |
| unknown | B.1.1 |
| unknown | B.1.1 |
| unknown | B.1.1 |
| unknown | B.1   |
| 59      | B.1.1 |
| 59      | B.1.1 |
| unknown | B.1   |
| unknown | B.1   |
| unknown | B.1   |

|         |          |
|---------|----------|
| unknown | B.1      |
| unknown | B.1      |
| unknown | B.1      |
| unknown | B.1.1    |
| unknown | B.1.1    |
| unknown | B.1      |
| unknown | B.1      |
| unknown | B.1      |
| unknown | B.1.1    |
| unknown | B.1.1    |
| unknown | B.1      |
| unknown | B.1.1    |
| unknown | B.1.1    |
| unknown | B.1.1    |
| unknown | B.1.1    |
| unknown | B.1.1    |
| 18      | B.1.1    |
| 72      | B.1.1.33 |
| 44      | B.1.1    |
| 74      | B.1.1    |
| unknown | B.1.1    |
| unknown | B.1.1    |
| unknown | B.1.1    |
| unknown | B.1.1    |
| unknown | B.1      |
| unknown | B.1.1    |
| unknown | B.1.1    |
| unknown | B.1.1    |
| unknown | B.1.1    |
| unknown | B.1.1    |
| unknown | B.1.1    |
| unknown | B.1.1    |
| unknown | B.1.1    |
| unknown | B.1.1    |
| unknown | B.1      |
| unknown | B.1.1    |
| unknown | B.1      |
| unknown | B.1      |
| unknown | B.1.1    |
| 56      | B.1      |
| 49      | B.1      |
| 39      | B.1      |
| 24      | B.1      |

|         |          |
|---------|----------|
| 71      | B.1      |
| 29      | B.1      |
| 30      | B.1      |
| 37      | B.1      |
| 56      | B.1      |
| 59      | B.1      |
| 58      | B.1      |
| 29      | B.1      |
| 29      | B.1      |
| 40      | B.1.1    |
| 59      | B.1      |
| 51      | B.1      |
| 11      | B.1      |
| 82      | B.1.1.1  |
| 57      | B.1.1.35 |
| 42      | B.1.1.35 |
| 53      | B.1      |
| 22      | B.1.1    |
| 68      | B.1      |
| unknown | B.1      |
| 55      | B.1      |
| unknown | B.1      |
| unknown | B.1      |
| unknown | B.1.1    |
| unknown | B.1.1    |
| unknown | B.1.1    |
| unknown | B.1.1    |
| unknown | B.1.1    |
| unknown | B.1.1    |
| unknown | B.1.1    |
| unknown | B.1.1    |
| unknown | B.1.1    |
| unknown | B.1.1    |
| 40      | B.1      |
| 83      | B.2.1    |
| 90      | B.2.1    |
| 66      | B.2.1    |
| unknown | B.1      |
| 76      | B.1.1    |
| 41      | B.2.1    |
| 59      | B.1      |
| unknown | B.1      |
| unknown | B.1      |
| 33      | B.1.1    |
| 93      | B.1.1    |

|         |         |
|---------|---------|
| unknown | B.1.1   |
| 60      | B.1     |
| unknown | B.1.1   |
| unknown | B.1.1   |
| unknown | B.1.1   |
| unknown | B.1.1   |
| unknown | B.1.1   |
| unknown | B.1.1   |
| 43      | B.1.1   |
| unknown | B.1.5   |
| 38      | B.1     |
| 49      | B.1     |
| 39      | B.1.1   |
| 32      | B.1     |
| 28      | B.1     |
| 43      | B.1     |
| 32      | B.1     |
| 30      | B.1     |
| 48      | B.1.5   |
| 66      | B.1     |
| 60-64   | B.1     |
| unknown | B.1.1   |
| unknown | B.1.1   |
| unknown | B.1.1.1 |
| unknown | B.1.1   |
| unknown | B.1.1   |
| unknown | B.1.1   |
| unknown | B.1.5   |
| unknown | B.1.1.1 |
| unknown | B.1.1   |
| unknown | B.1     |
| unknown | B.1.1   |
| unknown | B.1.1   |
| unknown | B.1.1   |
| unknown | B.1.1   |
| 52      | B.1.1   |
| 71      | B.1.1   |
| 19      | B.1.1   |
| 81      | B.1.1   |
| 56      | B.1.1   |
| 58      | B.1.1   |
| 6       | B.1.1   |
| 15      | B.1.1   |
| 51      | B.1.1   |

|         |         |
|---------|---------|
| 68      | B.1.1   |
| 53      | B.1.1   |
| 50      | B.1.1   |
| 45      | B.1.1   |
| 20      | B.1.1   |
| 87      | B.1.1   |
| unknown | B.1.1   |
| 18      | B.1.1   |
| 43      | B.1.1   |
| unknown | B.1.1   |
| 58      | B.1.1   |
| unknown | B.1.1   |
| 73      | B.1.1   |
| 27      | B.1.1   |
| 40      | B.1     |
| 58      | B.1     |
| 48      | B.1     |
| 32      | B.1.1   |
| 62      | B.1.1   |
| 71      | B.1     |
| 49      | B.1.1   |
| 20      | B.1.1   |
| unknown | B.1.1   |
| unknown | B.1.1   |
| 29      | B.1     |
| 26      | B.1.1   |
| 24      | B.1.1   |
| 43      | B.1     |
| unknown | B.1.1   |
| unknown | B.1     |
| unknown | B.1.1.1 |
| unknown | B.1.1.1 |
| unknown | B       |
| unknown | B.1.1   |
| unknown | B.1.1   |
| unknown | B.1.1   |
| unknown | B.1.1   |
| unknown | B.1.1   |
| unknown | B.1.1   |
| unknown | B.1.1   |
| unknown | B.1.1   |
| unknown | B.1.1   |
| unknown | B.1.126 |
| 55      | B.1     |
| 57      | B.1.1   |
| unknown | B.1.1   |
