# Supplementary material for: SARS-CoV-2 shifting transmission dynamics and hidden reservoirs limited the efficacy of public health interventions in Italy
Source: bioRxiv or medRxiv preprint supplement (doi:10.1101/2020.12.16.20248355), 2020-12-19
Supplement: Supplementary file [file media-3.pdf]

| <b>Virus name</b>                   | <b>Accession ID</b> | <b>Collection date</b> |
|-------------------------------------|---------------------|------------------------|
| hCoV-19/Italy/LAZ-INMI1-cs/2020     | EPI_ISL_410546      | 1/31/20                |
| hCoV-19/Italy/LOM-ASST-CDG1/2020    | EPI_ISL_412973      | 2/20/20                |
| hCoV-19/Italy/LOM-UniSR-1/2020      | EPI_ISL_413489      | 3/3/20                 |
| hCoV-19/Italy/FVG-ICGEB-S1/2020     | EPI_ISL_417418      | 1/3/20                 |
| hCoV-19/Italy/FVG-ICGEB-S5/2020     | EPI_ISL_417419      | 1/3/20                 |
| hCoV-19/Italy/FVG-ICGEB-S8/2020     | EPI_ISL_417421      | 1/3/20                 |
| hCoV-19/Italy/FVG-ICGEB-S9/2020     | EPI_ISL_417423      | 1/3/20                 |
| hCoV-19/Italy/LOM-UniMI01/2020      | EPI_ISL_417445      | 2/24/20                |
| hCoV-19/Italy/LOM-UniMI03/2020      | EPI_ISL_417447      | 2/24/20                |
| hCoV-19/Italy/MAR-UnivPM-1/2020     | EPI_ISL_417491      | 3/3/20                 |
| hCoV-19/Italy/LAZ-INMI3/2020        | EPI_ISL_417921      | 1/3/20                 |
| hCoV-19/Italy/LAZ-INMI4/2020        | EPI_ISL_417922      | 2/28/20                |
| hCoV-19/Italy/LAZ-INMI5/2020        | EPI_ISL_417923      | 4/3/20                 |
| hCoV-19/Italy/ABR-IZSGC-TE4925/2020 | EPI_ISL_418255      | 3/14/20                |
| hCoV-19/Italy/ABR-IZSGC-TE4880/2020 | EPI_ISL_418256      | 3/14/20                |
| hCoV-19/Italy/ABR-IZSGC-TE5056/2020 | EPI_ISL_418257      | 3/17/20                |
| hCoV-19/Italy/ABR-IZSGC-TE4953/2020 | EPI_ISL_418258      | 3/14/20                |
| hCoV-19/Italy/ABR-IZSGC-TE4959/2020 | EPI_ISL_418259      | 3/14/20                |
| hCoV-19/Italy/ABR-IZSGC-TE4836/2020 | EPI_ISL_418260      | 3/16/20                |
| hCoV-19/Italy/LAZ-INMI-6/2020       | EPI_ISL_419254      | 3/23/20                |
| hCoV-19/Italy/LAZ-INMI-7/2020       | EPI_ISL_419255      | 3/23/20                |
| hCoV-19/Italy/ABR-IZSGC-TE5166/2020 | EPI_ISL_420563      | 3/18/20                |
| hCoV-19/Italy/ABR-IZSGC-TE5472/2020 | EPI_ISL_420564      | 3/19/20                |
| hCoV-19/Italy/TE-IZSGC-TE5476/2020  | EPI_ISL_420565      | 3/19/20                |
| hCoV-19/Italy/ABR-IZSGC-TE5512/2020 | EPI_ISL_420566      | 3/19/20                |
| hCoV-19/Italy/ABR-IZSGC-TE5780/2020 | EPI_ISL_420567      | 3/21/20                |
| hCoV-19/Italy/ABR-IZSGC-6193/2020   | EPI_ISL_420568      | 3/23/20                |
| hCoV-19/Italy/ABR-IZSGC-TE6195/2020 | EPI_ISL_420569      | 3/23/20                |
| hCoV-19/Italy/ABR-IZSGC-TE6222/2020 | EPI_ISL_420583      | 3/23/20                |
| hCoV-19/Italy/VEN-IZSve-21-26/2020  | EPI_ISL_422437      | 3/25/20                |
| hCoV-19/Italy/VEN-IZSve-21-37/2020  | EPI_ISL_422438      | 3/25/20                |
| hCoV-19/Italy/LAZ-INMI-8/2020       | EPI_ISL_424342      | 7/3/20                 |
| hCoV-19/Italy/LAZ-INMI-9/2020       | EPI_ISL_424343      | 3/23/20                |
| hCoV-19/Italy/LAZ-INMI10/2020       | EPI_ISL_424344      | 4/3/20                 |
| hCoV-19/Italy/FVG-ICGEB-S14/2020    | EPI_ISL_428853      | 3/30/20                |
| hCoV-19/Italy/FVG-ICGEB-S18/2020    | EPI_ISL_428854      | 3/30/20                |
| hCoV-19/Italy/ABR-IZSGC-TE5551/2020 | EPI_ISL_429226      | 3/17/20                |
| hCoV-19/Italy/ABR-IZSGC-TE5553/2020 | EPI_ISL_429227      | 3/17/20                |
| hCoV-19/Italy/ABR-IZSGC-TE5674/2020 | EPI_ISL_429228      | 3/20/20                |
| hCoV-19/Italy/ABR-IZSGC-TE6571/2020 | EPI_ISL_429231      | 3/24/20                |
| hCoV-19/Italy/ABR-IZSGC-TE6572/2020 | EPI_ISL_429232      | 3/24/20                |
| hCoV-19/Italy/ABR-IZSGC-TE6580/2020 | EPI_ISL_429235      | 3/24/20                |
| hCoV-19/Italy/ABR-AMVRC-TE7859/2020 | EPI_ISL_429236      | 3/28/20                |
| hCoV-19/Italy/ABR-IZSGC-TE6644/2020 | EPI_ISL_435145      | 3/24/20                |

|                                      |                |         |
|--------------------------------------|----------------|---------|
| hCoV-19/Italy/ABR-IZSGC-TE12337/2020 | EPI_ISL_435146 | 7/4/20  |
| hCoV-19/Italy/ABR-IZSGC-TE12759/2020 | EPI_ISL_435147 | 8/4/20  |
| hCoV-19/Italy/ABR-IZSGC-TE13491/2020 | EPI_ISL_435148 | 8/4/20  |
| hCoV-19/Italy/ABR-IZSGC-TE13457/2020 | EPI_ISL_435149 | 8/4/20  |
| hCoV-19/Italy/ABR-IZSGC-TE12774/2020 | EPI_ISL_435150 | 8/4/20  |
| hCoV-19/Italy/ABR-IZSGC-TE13484/2020 | EPI_ISL_435151 | 8/4/20  |
| hCoV-19/Italy/ABR-IZSGC-TE13858/2020 | EPI_ISL_435152 | 9/4/20  |
| hCoV-19/Italy/ABR-IZSGC-TE14297/2020 | EPI_ISL_435153 | 9/4/20  |
| hCoV-19/Italy/ABR-IZSGC-TE14162/2020 | EPI_ISL_435154 | 9/4/20  |
| hCoV-19/Italy/ABR-IZSGC-TE14168/2020 | EPI_ISL_435155 | 9/4/20  |
| hCoV-19/Italy/ABR-IZSGC-TE5473/2020  | EPI_ISL_436718 | 3/19/20 |
| hCoV-19/Italy/ABR-IZSGC-TE5541/2020  | EPI_ISL_436719 | 3/20/20 |
| hCoV-19/Italy/ABR-IZSGC-TE5543/2020  | EPI_ISL_436720 | 3/20/20 |
| hCoV-19/Italy/ABR-IZSGC-TE5545/2020  | EPI_ISL_436721 | 3/20/20 |
| hCoV-19/Italy/ABR-IZSGC-TE5547/2020  | EPI_ISL_436722 | 3/20/20 |
| hCoV-19/Italy/ABR-IZSGC-TE5687/2020  | EPI_ISL_436723 | 3/20/20 |
| hCoV-19/Italy/ABR-IZSGC-TE5827/2020  | EPI_ISL_436724 | 3/21/20 |
| hCoV-19/Italy/ABR-IZSGC-TE27020/2020 | EPI_ISL_436725 | 4/27/20 |
| hCoV-19/Italy/ABR-IZSGC-TE26533/2020 | EPI_ISL_436726 | 4/27/20 |
| hCoV-19/Italy/ABR-IZSGC-TE26539/2020 | EPI_ISL_436727 | 4/27/20 |
| hCoV-19/Italy/ABR-IZSGC-TE26643/2020 | EPI_ISL_436729 | 4/27/20 |
| hCoV-19/Italy/ABR-IZSGC-TE26969/2020 | EPI_ISL_436730 | 4/27/20 |
| hCoV-19/Italy/ABR-IZSGC-TE26423/2020 | EPI_ISL_436731 | 4/26/20 |
| hCoV-19/Italy/ABR-IZSGC-TE26425/2020 | EPI_ISL_436732 | 4/27/20 |
| hCoV-19/Italy/LAZ-INMI2-N/2020       | EPI_ISL_451302 | 1/30/20 |
| hCoV-19/Italy/LAZ-INMI5-N/2020       | EPI_ISL_451303 | 4/3/20  |
| hCoV-19/Italy/LAZ-INMI11-B/2020      | EPI_ISL_451304 | 3/23/20 |
| hCoV-19/Italy/LOM-INMI-5314-B/2020   | EPI_ISL_451306 | 2/21/20 |
| hCoV-19/Italy/LOM-INMI-5314-N/2020   | EPI_ISL_451307 | 2/21/20 |
| hCoV-19/Italy/LOM-INMI-13075-B/2020  | EPI_ISL_451308 | 1/3/20  |
| hCoV-19/Italy/LOM-INMI-13075-N/2020  | EPI_ISL_451309 | 1/3/20  |
| hCoV-19/Italy/APU-UniMI-CL1/2020     | EPI_ISL_451961 | 3/14/20 |
| hCoV-19/Italy/APU-UniMI-1259/2020    | EPI_ISL_451962 | 3/20/20 |
| hCoV-19/Italy/VEN-IZSVe-10-41/2020   | EPI_ISL_452181 | 3/22/20 |
| hCoV-19/Italy/VEN-IZSVe-11-181/2020  | EPI_ISL_452182 | 3/23/20 |
| hCoV-19/Italy/VEN-IZSVe-17-11/2020   | EPI_ISL_452183 | 3/24/20 |
| hCoV-19/Italy/VEN-IZSVe-18-48/2020   | EPI_ISL_452184 | 3/24/20 |
| hCoV-19/Italy/VEN-IZSVe-23-50/2020   | EPI_ISL_452185 | 3/26/20 |
| hCoV-19/Italy/VEN-IZSVe-25-80/2020   | EPI_ISL_452186 | 3/28/20 |
| hCoV-19/Italy/VEN-IZSVe-31-18/2020   | EPI_ISL_452187 | 3/31/20 |
| hCoV-19/Italy/VEN-IZSVe-31-19/2020   | EPI_ISL_452188 | 3/31/20 |
| hCoV-19/Italy/VEN-IZSVe-33-126/2020  | EPI_ISL_452189 | 1/4/20  |
| hCoV-19/Italy/VEN-IZSVe-46-8/2020    | EPI_ISL_452190 | 3/4/20  |
| hCoV-19/Italy/VEN-IZSVe-46-23/2020   | EPI_ISL_452191 | 3/4/20  |
| hCoV-19/Italy/TUS-UniSI-1/2020       | EPI_ISL_454733 | 1/3/20  |

|                                       |                |         |
|---------------------------------------|----------------|---------|
| hCoV-19/Italy/EMR-AMVRC-206/2020      | EPI_ISL_457699 | 2/22/20 |
| hCoV-19/Italy/TAA-AMVRC-2629/2020     | EPI_ISL_457700 | 6/3/20  |
| hCoV-19/Italy/SIC-AMVRC-4411/2020     | EPI_ISL_457721 | 12/3/20 |
| hCoV-19/Italy/AVA-AMVRC-4875/2020     | EPI_ISL_457724 | 3/15/20 |
| hCoV-19/Italy/MOL-AMVRC-2389/2020     | EPI_ISL_457728 | 4/3/20  |
| hCoV-19/Italy/AVA-AMVRC-4870/2020     | EPI_ISL_457732 | 3/14/20 |
| hCoV-19/Italy/BAS-UniMI-5062/2020     | EPI_ISL_457736 | 3/24/20 |
| hCoV-19/Italy/ABR-IZSGC-484/2020      | EPI_ISL_457749 | 2/27/20 |
| hCoV-19/Italy/SAR-ATS-AMC1-4634/2020  | EPI_ISL_457825 | 3/25/20 |
| hCoV-19/Italy/LOM-ASST-AMC2-1245/2020 | EPI_ISL_457826 | 8/3/20  |
| hCoV-19/Italy/SAR-ATS-04039046/2020   | EPI_ISL_458084 | 3/4/20  |
| hCoV-19/Italy/SAR-AMVRC-28/2020       | EPI_ISL_458085 | 12/4/20 |
| hCoV-19/Italy/LOM-INMI-BG-5825/2020   | EPI_ISL_460079 | 2/22/20 |
| hCoV-19/Italy/LOM-INMI-BG-11639/2020  | EPI_ISL_460080 | 2/28/20 |
| hCoV-19/Italy/LOM-INMI-BG-7158/2020   | EPI_ISL_460081 | 2/24/20 |
| hCoV-19/Italy/LOM-INMI-BG-9209/2020   | EPI_ISL_460082 | 2/26/20 |
| hCoV-19/Italy/LOM-INMI-BG-9225/2020   | EPI_ISL_460083 | 2/26/20 |
| hCoV-19/Italy/LOM-INMI-BS-12256/2020  | EPI_ISL_460084 | 2/29/20 |
| hCoV-19/Italy/LOM-INMI-13221/2020     | EPI_ISL_460085 | 1/3/20  |
| hCoV-19/Italy/LOM-INMI-7070/2020      | EPI_ISL_460086 | 2/24/20 |
| hCoV-19/Italy/LOM-INMI-9206/2020      | EPI_ISL_460087 | 2/26/20 |
| hCoV-19/Italy/LOM-INMI-9214/2020      | EPI_ISL_460088 | 2/26/20 |
| hCoV-19/Italy/LOM-INMI-9491/2020      | EPI_ISL_460089 | 2/26/20 |
| hCoV-19/Italy/LOM-INMI-11550/2020     | EPI_ISL_460090 | 2/28/20 |
| hCoV-19/Italy/LOM-INMI-5925/2020      | EPI_ISL_460091 | 2/22/20 |
| hCoV-19/Italy/LOM-INMI-11951/2020     | EPI_ISL_460092 | 2/28/20 |
| hCoV-19/Italy/LOM-INMI-12578/2020     | EPI_ISL_460093 | 2/29/20 |
| hCoV-19/Italy/LOM-INMI-8058/2020      | EPI_ISL_460094 | 2/25/20 |
| hCoV-19/Italy/LOM-INMI-9675/2020      | EPI_ISL_460095 | 2/26/20 |
| hCoV-19/Italy/APU-UniMI-703/2020      | EPI_ISL_468914 | 3/18/20 |
| hCoV-19/Italy/APU-UniMI-706/2020      | EPI_ISL_469016 | 3/18/20 |
| hCoV-19/Italy/APU-UniMI-802/2020      | EPI_ISL_469018 | 3/19/20 |
| hCoV-19/Italy/APU-UniMI-804/2020      | EPI_ISL_469019 | 3/20/20 |
| hCoV-19/Italy/APU-UniMI-809/2020      | EPI_ISL_469020 | 3/19/20 |
| hCoV-19/Italy/APU-UniMI-813/2020      | EPI_ISL_469021 | 3/20/20 |
| hCoV-19/Italy/APU-UniMI-847/2020      | EPI_ISL_469022 | 3/20/20 |
| hCoV-19/Italy/APU-UniMI-857/2020      | EPI_ISL_469023 | 3/20/20 |
| hCoV-19/Italy/APU-UniMI-45/2020       | EPI_ISL_477193 | 3/16/20 |
| hCoV-19/Italy/APU-UniMI-39/2020       | EPI_ISL_477194 | 3/16/20 |
| hCoV-19/Italy/BAS-AMVRC-4162/2020     | EPI_ISL_477195 | 7/4/20  |
| hCoV-19/Italy/BAS-UniMI-4028/2020     | EPI_ISL_477196 | 6/4/20  |
| hCoV-19/Italy/BAS-UniMI-3725/2020     | EPI_ISL_477197 | 3/4/20  |
| hCoV-19/Italy/BAS-UniMI-2627/2020     | EPI_ISL_477198 | 3/20/20 |
| hCoV-19/Italy/BAS-UniMI-2167/2020     | EPI_ISL_477199 | 3/23/20 |
| hCoV-19/Italy/BAS-UniMI-2161/2020     | EPI_ISL_477200 | 3/23/20 |

|                                      |                |         |
|--------------------------------------|----------------|---------|
| hCoV-19/Italy/BAS-UniMI-2144/2020    | EPI_ISL_477201 | 3/23/20 |
| hCoV-19/Italy/APU-UniMI-854/2020     | EPI_ISL_477202 | 3/20/20 |
| hCoV-19/Italy/APU-UniMI-694/2020     | EPI_ISL_477203 | 3/19/20 |
| hCoV-19/Italy/CAM-CEINGE-1/2020      | EPI_ISL_477204 | 5/30/20 |
| hCoV-19/Italy/FVG-ICGEB-bal1A/2020   | EPI_ISL_479616 | 3/27/20 |
| hCoV-19/Italy/FVG-ICGEB-bal1B/2020   | EPI_ISL_479617 | 3/27/20 |
| hCoV-19/Italy/FVG-ICGEB-bal16/2020   | EPI_ISL_479618 | 12/4/20 |
| hCoV-19/Italy/FVG-ICGEB-atr18/2020   | EPI_ISL_479619 | 12/4/20 |
| hCoV-19/Italy/FVG-ICGEB-atr21/2020   | EPI_ISL_479790 | 4/13/20 |
| hCoV-19/Italy/FVG-ICGEB-S26/2020     | EPI_ISL_479791 | 8/3/20  |
| hCoV-19/Italy/LOM-ASST-2/2020        | EPI_ISL_486646 | 9/3/20  |
| hCoV-19/Italy/LOM-ASST-13/2020       | EPI_ISL_486650 | 3/17/20 |
| hCoV-19/Italy/LOM-ASST-14/2020       | EPI_ISL_486651 | 3/24/20 |
| hCoV-19/Italy/LOM-ASST-15/2020       | EPI_ISL_486652 | 2/4/20  |
| hCoV-19/Italy/LOM-ASST-16/2020       | EPI_ISL_486653 | 3/20/20 |
| hCoV-19/Italy/LOM-ASST-18/2020       | EPI_ISL_486655 | 2/4/20  |
| hCoV-19/Italy/LOM-ASST-20/2020       | EPI_ISL_486657 | 2/26/20 |
| hCoV-19/Italy/LOM-ASST-21/2020       | EPI_ISL_486658 | 1/4/20  |
| hCoV-19/Italy/LOM-ASST-3/2020        | EPI_ISL_486659 | 2/22/20 |
| hCoV-19/Italy/LOM-ASST-4/2020        | EPI_ISL_486660 | 2/23/20 |
| hCoV-19/Italy/LOM-ASST-6/2020        | EPI_ISL_486662 | 2/3/20  |
| hCoV-19/Italy/LOM-ASST-7/2020        | EPI_ISL_486663 | 6/3/20  |
| hCoV-19/Italy/LOM-ASST-8/2020        | EPI_ISL_486664 | 2/26/20 |
| hCoV-19/Italy/LOM-AMVRC-9/2020       | EPI_ISL_486665 | 3/3/20  |
| hCoV-19/Italy/CAM-INTPas-1/2020      | EPI_ISL_492184 | 2020    |
| hCoV-19/Italy/VEN-UniVR-1/2020       | EPI_ISL_492980 | 3/18/20 |
| hCoV-19/Italy/VEN-UniVR-2/2020       | EPI_ISL_492981 | 7/4/20  |
| hCoV-19/Italy/VEN-UniVR-3/2020       | EPI_ISL_492982 | 7/4/20  |
| hCoV-19/Italy/VEN-UniVR-4/2020       | EPI_ISL_492983 | 4/18/20 |
| hCoV-19/Italy/VEN-UniVR-5/2020       | EPI_ISL_492984 | 11/3/20 |
| hCoV-19/Italy/VEN-UniVR-6/2020       | EPI_ISL_492985 | 8/3/20  |
| hCoV-19/Italy/VEN-UniVR-7/2020       | EPI_ISL_492986 | 10/3/20 |
| hCoV-19/Italy/VEN-UniVR-8/2020       | EPI_ISL_492987 | 5/3/20  |
| hCoV-19/Italy/LAZ-INMI16/2020        | EPI_ISL_493328 | 3/15/20 |
| hCoV-19/Italy/LAZ-INMI17/2020        | EPI_ISL_493329 | 4/3/20  |
| hCoV-19/Italy/LAZ-INMI18/2020        | EPI_ISL_493330 | 10/5/20 |
| hCoV-19/Italy/LAZ-INMI19/2020        | EPI_ISL_493331 | 7/5/20  |
| hCoV-19/Italy/CAM-INMI-32798-45/2020 | EPI_ISL_493332 | 3/28/20 |
| hCoV-19/Italy/CAM-INMI-32803-66/2020 | EPI_ISL_493333 | 3/28/20 |
| hCoV-19/Italy/CAM-INTPas-5/2020      | EPI_ISL_494757 | 2020    |
| hCoV-19/Italy/CAM-INTPas-6/2020      | EPI_ISL_494759 | 2020    |
| hCoV-19/Italy/CAM-INTPas-7/2020      | EPI_ISL_494761 | 2020    |
| hCoV-19/Italy/CAM-INTPas-10/2020     | EPI_ISL_494771 | 2020    |
| hCoV-19/Italy/VEN-IZSV-9/2020        | EPI_ISL_496482 | 3/17/20 |
| hCoV-19/Italy/FVG-ICGEB-S208/2020    | EPI_ISL_498558 | 2020-07 |

|                                       |                |         |
|---------------------------------------|----------------|---------|
| hCoV-19/Italy/FVG-ICGEB-S211/2020     | EPI_ISL_498559 | 1/7/20  |
| hCoV-19/Italy/FVG-ICGEB-S212/2020     | EPI_ISL_498560 | 2/7/20  |
| hCoV-19/Italy/FVG-ICGEB-S214/2020     | EPI_ISL_498561 | 1/7/20  |
| hCoV-19/Italy/FVG-ICGEB-S217/2020     | EPI_ISL_498562 | 7/7/20  |
| hCoV-19/Italy/FVG-ICGEB-S218/2020     | EPI_ISL_498563 | 6/7/20  |
| hCoV-19/Italy/CAM-CEINGE-5/2020       | EPI_ISL_514432 | 4/15/20 |
| hCoV-19/Italy/CAM-CEINGE-S66/2020     | EPI_ISL_514751 | 4/15/20 |
| hCoV-19/Italy/MAR-UnivPM-32898/2020   | EPI_ISL_516079 | 8/3/20  |
| hCoV-19/Italy/MAR-UnivPM-34104/2020   | EPI_ISL_516080 | 9/3/20  |
| hCoV-19/Italy/MAR-UnivPM-34117/2020   | EPI_ISL_516081 | 9/3/20  |
| hCoV-19/Italy/MAR-UnivPM-43950/2020   | EPI_ISL_516082 | 3/18/20 |
| hCoV-19/Italy/MAR-UnivPM-71205/2020   | EPI_ISL_516083 | 2/26/20 |
| hCoV-19/Italy/MAR-UnivPM-73696/2020   | EPI_ISL_516084 | 2/28/20 |
| hCoV-19/Italy/MAR-UnivPM-73702/2020   | EPI_ISL_516085 | 2/28/20 |
| hCoV-19/Italy/MAR-UnivPM-78952/2020   | EPI_ISL_516086 | 4/3/20  |
| hCoV-19/Italy/MAR-UnivPM-78955/2020   | EPI_ISL_516087 | 4/3/20  |
| hCoV-19/Italy/MAR-UnivPM-78955-2/2020 | EPI_ISL_516088 | 4/3/20  |
| hCoV-19/Italy/VEN-IZSve-101-12/2020   | EPI_ISL_522855 | 4/20/20 |
| hCoV-19/Italy/VEN-IZSve-46-41/2020    | EPI_ISL_522856 | 3/4/20  |
| hCoV-19/Italy/VEN-IZSve-50893/2020    | EPI_ISL_522857 | 4/26/20 |
| hCoV-19/Italy/VEN-IZSve-51-5/2020     | EPI_ISL_522858 | 7/4/20  |
| hCoV-19/Italy/VEN-IZSve-51635/2020    | EPI_ISL_522859 | 1/5/20  |
| hCoV-19/Italy/VEN-IZSve-54-17/2020    | EPI_ISL_522860 | 8/4/20  |
| hCoV-19/Italy/VEN-IZSve-55-111/2020   | EPI_ISL_522861 | 8/4/20  |
| hCoV-19/Italy/VEN-IZSve-55-16/2020    | EPI_ISL_522862 | 8/4/20  |
| hCoV-19/Italy/VEN-IZSve-55-18/2020    | EPI_ISL_522863 | 8/4/20  |
| hCoV-19/Italy/VEN-IZSve-55-56/2020    | EPI_ISL_522864 | 8/4/20  |
| hCoV-19/Italy/VEN-IZSve-60-40/2020    | EPI_ISL_522865 | 8/4/20  |
| hCoV-19/Italy/VEN-IZSve-63-7/2020     | EPI_ISL_522866 | 9/4/20  |
| hCoV-19/Italy/VEN-IZSve-71-10/2020    | EPI_ISL_522867 | 10/4/20 |
| hCoV-19/Italy/VEN-IZSve-94-28/2020    | EPI_ISL_522868 | 4/17/20 |
| hCoV-19/Italy/FVG-ICGEB-S204/2020     | EPI_ISL_525495 | 11/6/20 |
| hCoV-19/Italy/FVG-ICGEB-S205/2020     | EPI_ISL_525496 | 11/6/20 |
| hCoV-19/Italy/APU-UniMI-102/2020      | EPI_ISL_525553 | 3/16/20 |
| hCoV-19/Italy/APU-UniMI-123PT/2020    | EPI_ISL_525554 | 7/20/20 |
| hCoV-19/Italy/APU-UniMI-141PT/2020    | EPI_ISL_525555 | 7/4/20  |
| hCoV-19/Italy/APU-UniMI-22/2020       | EPI_ISL_525556 | 3/16/20 |
| hCoV-19/Italy/APU-UniMI-368/2020      | EPI_ISL_525557 | 3/17/20 |
| hCoV-19/Italy/APU-UniMI-4357/2020     | EPI_ISL_525558 | 9/4/20  |
| hCoV-19/Italy/APU-UniMI-4431/2020     | EPI_ISL_525559 | 9/4/20  |
| hCoV-19/Italy/APU-UniMI-5409/2020     | EPI_ISL_525560 | 11/4/20 |
| hCoV-19/Italy/APU-UniMI-5410/2020     | EPI_ISL_525561 | 11/4/20 |
| hCoV-19/Italy/APU-UniMI-5418/2020     | EPI_ISL_525562 | 11/4/20 |
| hCoV-19/Italy/APU-UniMI-5425/2020     | EPI_ISL_525563 | 11/4/20 |
| hCoV-19/Italy/APU-UniMI-5428/2020     | EPI_ISL_525564 | 11/4/20 |

|                                      |                |         |
|--------------------------------------|----------------|---------|
| hCoV-19/Italy/APU-UniMI-5429/2020    | EPI_ISL_525565 | 11/4/20 |
| hCoV-19/Italy/APU-UniMI-5430/2020    | EPI_ISL_525566 | 11/4/20 |
| hCoV-19/Italy/APU-UniMI-5433/2020    | EPI_ISL_525567 | 11/4/20 |
| hCoV-19/Italy/APU-UniMI-5436/2020    | EPI_ISL_525568 | 11/4/20 |
| hCoV-19/Italy/APU-UniMI-5439/2020    | EPI_ISL_525569 | 11/4/20 |
| hCoV-19/Italy/APU-UniMI-6/2020       | EPI_ISL_525570 | 3/16/20 |
| hCoV-19/Italy/APU-UniMI-62PT/2020    | EPI_ISL_525571 | 3/28/20 |
| hCoV-19/Italy/APU-UniMI-64PT/2020    | EPI_ISL_525572 | 1/6/20  |
| hCoV-19/Italy/BAS-UniMI-2956/2020    | EPI_ISL_525573 | 3/27/20 |
| hCoV-19/Italy/BAS-UniMI-4160/2020    | EPI_ISL_525574 | 8/4/20  |
| hCoV-19/Italy/APU-UniMI-4663/2020    | EPI_ISL_527380 | 10/4/20 |
| hCoV-19/Italy/ABR-IZSGC-TE4884/2020  | EPI_ISL_528919 | 3/17/20 |
| hCoV-19/Italy/ABR-IZSGC-TE4891/2020  | EPI_ISL_528920 | 3/17/20 |
| hCoV-19/Italy/ABR-IZSGC-TE4926/2020  | EPI_ISL_528921 | 3/17/20 |
| hCoV-19/Italy/ABR-IZSGC-TE5040/2020  | EPI_ISL_528922 | 3/17/20 |
| hCoV-19/Italy/ABR-IZSGC-TE5173/2020  | EPI_ISL_528924 | 3/18/20 |
| hCoV-19/Italy/ABR-IZSGC-TE5268/2020  | EPI_ISL_528925 | 3/18/20 |
| hCoV-19/Italy/ABR-IZSGC-TE5487/2020  | EPI_ISL_528926 | 3/19/20 |
| hCoV-19/Italy/ABR-IZSGC-TE6202/2020  | EPI_ISL_528927 | 3/23/20 |
| hCoV-19/Italy/ABR-IZSGC-TE6218/2020  | EPI_ISL_528928 | 3/23/20 |
| hCoV-19/Italy/ABR-IZSGC-TE7097/2020  | EPI_ISL_528929 | 3/26/20 |
| hCoV-19/Italy/LOM-IZSGC-TE30933/2020 | EPI_ISL_528934 | 2/5/20  |
| hCoV-19/Italy/LOM-IZSGC-TE31054/2020 | EPI_ISL_528935 | 2/5/20  |
| hCoV-19/Italy/LOM-IZSGC-TE31074/2020 | EPI_ISL_528936 | 2/5/20  |
| hCoV-19/Italy/LOM-IZSGC-TE31135/2020 | EPI_ISL_528937 | 2/5/20  |
| hCoV-19/Italy/LOM-IZSGC-TE31751/2020 | EPI_ISL_528938 | 2/5/20  |
| hCoV-19/Italy/LOM-IZSGC-TE31811/2020 | EPI_ISL_528939 | 2/5/20  |
| hCoV-19/Italy/LOM-IZSGC-TE31818/2020 | EPI_ISL_528940 | 2/5/20  |
| hCoV-19/Italy/LOM-IZSGC-TE35432/2020 | EPI_ISL_528941 | 8/5/20  |
| hCoV-19/Italy/LOM-IZSGC-TE35441/2020 | EPI_ISL_528942 | 8/5/20  |
| hCoV-19/Italy/LOM-IZSGC-TE35526/2020 | EPI_ISL_528943 | 8/5/20  |
| hCoV-19/Italy/LOM-IZSGC-TE35532/2020 | EPI_ISL_528944 | 8/5/20  |
| hCoV-19/Italy/LOM-IZSGC-TE35566/2020 | EPI_ISL_528945 | 8/5/20  |
| hCoV-19/Italy/LOM-IZSGC-TE35578/2020 | EPI_ISL_528946 | 8/5/20  |
| hCoV-19/Italy/LOM-IZSGC-TE38811/2020 | EPI_ISL_528947 | 10/5/20 |
| hCoV-19/Italy/LOM-IZSGC-TE38819/2020 | EPI_ISL_528948 | 10/5/20 |
| hCoV-19/Italy/LOM-IZSGC-TE38845/2020 | EPI_ISL_528949 | 10/5/20 |
| hCoV-19/Italy/ABR-IZSGC-TE10002/2020 | EPI_ISL_528990 | 1/4/20  |
| hCoV-19/Italy/ABR-IZSGC-TE10007/2020 | EPI_ISL_528991 | 2/4/20  |
| hCoV-19/Italy/ABR-IZSGC-TE34742/2020 | EPI_ISL_528993 | 4/5/20  |
| hCoV-19/Italy/ABR-IZSGC-TE46129/2020 | EPI_ISL_528994 | 5/13/20 |
| hCoV-19/Italy/ABR-IZSGC-TE46424/2020 | EPI_ISL_528995 | 5/14/20 |
| hCoV-19/Italy/ABR-IZSGC-TE46428/2020 | EPI_ISL_528996 | 5/14/20 |
| hCoV-19/Italy/ABR-IZSGC-TE46429/2020 | EPI_ISL_528997 | 5/14/20 |
| hCoV-19/Italy/ABR-IZSGC-TE46433/2020 | EPI_ISL_528998 | 5/14/20 |

|                                      |                |         |
|--------------------------------------|----------------|---------|
| hCoV-19/Italy/ABR-IZSGC-TE46435/2020 | EPI_ISL_528999 | 5/14/20 |
| hCoV-19/Italy/ABR-IZSGC-TE46436/2020 | EPI_ISL_529000 | 5/14/20 |
| hCoV-19/Italy/ABR-IZSGC-TE46439/2020 | EPI_ISL_529001 | 5/14/20 |
| hCoV-19/Italy/ABR-IZSGC-TE49273/2020 | EPI_ISL_529003 | 5/16/20 |
| hCoV-19/Italy/ABR-IZSGC-TE49480/2020 | EPI_ISL_529004 | 5/16/20 |
| hCoV-19/Italy/ABR-IZSGC-TE49482/2020 | EPI_ISL_529005 | 5/16/20 |
| hCoV-19/Italy/ABR-IZSGC-TE77497/2020 | EPI_ISL_529006 | 9/6/20  |
| hCoV-19/Italy/ABR-IZSGC-TE79445/2020 | EPI_ISL_529007 | 6/13/20 |
| hCoV-19/Italy/ABR-IZSGC-TE9047/2020  | EPI_ISL_529009 | 1/4/20  |
| hCoV-19/Italy/ABR-IZSGC-TE92551/2020 | EPI_ISL_529010 | 7/7/20  |
| hCoV-19/Italy/ABR-IZSGC-TE92552/2020 | EPI_ISL_529011 | 7/7/20  |
| hCoV-19/Italy/ABR-IZSGC-TE93935/2020 | EPI_ISL_529012 | 9/7/20  |
| hCoV-19/Italy/ABR-IZSGC-TE94745/2020 | EPI_ISL_529013 | 10/7/20 |
| hCoV-19/Italy/ABR-IZSGC-TE99752/2020 | EPI_ISL_529014 | 7/20/20 |
| hCoV-19/Italy/ABR-IZSGC-TE99753/2020 | EPI_ISL_529015 | 7/20/20 |
| hCoV-19/Italy/ABR-IZSGC-TE10151/2020 | EPI_ISL_529016 | 2/4/20  |
| hCoV-19/Italy/ABR-IZSGC-TE18513/2020 | EPI_ISL_529018 | 4/17/20 |
| hCoV-19/Italy/ABR-IZSGC-TE27016/2020 | EPI_ISL_529019 | 4/27/20 |
| hCoV-19/Italy/ABR-IZSGC-TE28268/2020 | EPI_ISL_529020 | 4/29/20 |
| hCoV-19/Italy/ABR-IZSGC-TE30364/2020 | EPI_ISL_529021 | 4/29/20 |
| hCoV-19/Italy/ABR-IZSGC-TE36500/2020 | EPI_ISL_529022 | 6/5/20  |
| hCoV-19/Italy/ABR-IZSGC-TE8387/2020  | EPI_ISL_529026 | 3/30/20 |
| hCoV-19/Italy/LOM-UniMI-L100/2020    | EPI_ISL_542098 | 8/3/20  |
| hCoV-19/Italy/LOM-UniMI-L101/2020    | EPI_ISL_542099 | 8/3/20  |
| hCoV-19/Italy/LOM-UniMI-L102/2020    | EPI_ISL_542100 | 9/3/20  |
| hCoV-19/Italy/LOM-UniMI-L103/2020    | EPI_ISL_542101 | 9/3/20  |
| hCoV-19/Italy/LOM-UniMI-L104/2020    | EPI_ISL_542102 | 6/3/20  |
| hCoV-19/Italy/LOM-UniMI-L105/2020    | EPI_ISL_542103 | 2/3/20  |
| hCoV-19/Italy/LOM-UniMI-L106/2020    | EPI_ISL_542104 | 9/3/20  |
| hCoV-19/Italy/LOM-UniMI-L107/2020    | EPI_ISL_542105 | 5/3/20  |
| hCoV-19/Italy/LOM-UniMI-L108/2020    | EPI_ISL_542106 | 2/3/20  |
| hCoV-19/Italy/LOM-UniMI-L109/2020    | EPI_ISL_542107 | 10/3/20 |
| hCoV-19/Italy/LOM-UniMI-L111/2020    | EPI_ISL_542108 | 5/3/20  |
| hCoV-19/Italy/LOM-UniMI-L112/2020    | EPI_ISL_542109 | 2/3/20  |
| hCoV-19/Italy/LOM-UniMI-L113/2020    | EPI_ISL_542110 | 9/3/20  |
| hCoV-19/Italy/LOM-UniMI-L115/2020    | EPI_ISL_542111 | 7/3/20  |
| hCoV-19/Italy/LOM-UniMI-L116/2020    | EPI_ISL_542112 | 2/3/20  |
| hCoV-19/Italy/LOM-UniMI-L117/2020    | EPI_ISL_542113 | 9/3/20  |
| hCoV-19/Italy/LOM-UniMI-L118/2020    | EPI_ISL_542114 | 3/16/20 |
| hCoV-19/Italy/LOM-UniMI-L119/2020    | EPI_ISL_542115 | 3/14/20 |
| hCoV-19/Italy/LOM-UniMI-L120/2020    | EPI_ISL_542116 | 12/3/20 |
| hCoV-19/Italy/LOM-UniMI-L121/2020    | EPI_ISL_542117 | 3/17/20 |
| hCoV-19/Italy/LOM-UniMI-L122/2020    | EPI_ISL_542118 | 9/3/20  |
| hCoV-19/Italy/LOM-UniMI-L123/2020    | EPI_ISL_542119 | 10/3/20 |
| hCoV-19/Italy/LOM-UniMI-L124/2020    | EPI_ISL_542120 | 10/3/20 |

|                                   |                |         |
|-----------------------------------|----------------|---------|
| hCoV-19/Italy/LOM-UniMI-L125/2020 | EPI_ISL_542121 | 3/13/20 |
| hCoV-19/Italy/LOM-UniMI-L126/2020 | EPI_ISL_542122 | 3/18/20 |
| hCoV-19/Italy/LOM-UniMI-L127/2020 | EPI_ISL_542123 | 3/17/20 |
| hCoV-19/Italy/LOM-UniMI-L128/2020 | EPI_ISL_542124 | 3/23/20 |
| hCoV-19/Italy/LOM-UniMI-L129/2020 | EPI_ISL_542125 | 2/28/20 |
| hCoV-19/Italy/LOM-UniMI-L130/2020 | EPI_ISL_542126 | 10/3/20 |
| hCoV-19/Italy/LOM-UniMI-L131/2020 | EPI_ISL_542127 | 3/20/20 |
| hCoV-19/Italy/LOM-UniMI-L132/2020 | EPI_ISL_542128 | 3/21/20 |
| hCoV-19/Italy/LOM-UniMI-L133/2020 | EPI_ISL_542129 | 3/18/20 |
| hCoV-19/Italy/LOM-UniMI-L134/2020 | EPI_ISL_542130 | 3/17/20 |
| hCoV-19/Italy/LOM-UniMI-L135/2020 | EPI_ISL_542131 | 3/19/20 |
| hCoV-19/Italy/LOM-UniMI-L136/2020 | EPI_ISL_542132 | 3/22/20 |
| hCoV-19/Italy/LOM-UniMI-L137/2020 | EPI_ISL_542133 | 3/23/20 |
| hCoV-19/Italy/LOM-UniMI-L138/2020 | EPI_ISL_542134 | 3/16/20 |
| hCoV-19/Italy/LOM-UniMI-L139/2020 | EPI_ISL_542135 | 3/18/20 |
| hCoV-19/Italy/LOM-UniMI-L140/2020 | EPI_ISL_542136 | 3/19/20 |
| hCoV-19/Italy/LOM-UniMI-L141/2020 | EPI_ISL_542137 | 3/19/20 |
| hCoV-19/Italy/LOM-UniMI-L142/2020 | EPI_ISL_542138 | 3/19/20 |
| hCoV-19/Italy/LOM-UniMI-L144/2020 | EPI_ISL_542139 | 3/19/20 |
| hCoV-19/Italy/LOM-UniMI-L145/2020 | EPI_ISL_542140 | 3/19/20 |
| hCoV-19/Italy/LOM-UniMI-L146/2020 | EPI_ISL_542141 | 3/19/20 |
| hCoV-19/Italy/LOM-UniMI-L147/2020 | EPI_ISL_542142 | 3/20/20 |
| hCoV-19/Italy/LOM-UniMI-L148/2020 | EPI_ISL_542143 | 7/3/20  |
| hCoV-19/Italy/LOM-UniMI-L149/2020 | EPI_ISL_542144 | 3/19/20 |
| hCoV-19/Italy/LOM-UniMI-L150/2020 | EPI_ISL_542145 | 3/13/20 |
| hCoV-19/Italy/LOM-UniMI-L151/2020 | EPI_ISL_542146 | 10/3/20 |
| hCoV-19/Italy/LOM-UniMI-L152/2020 | EPI_ISL_542147 | 3/16/20 |
| hCoV-19/Italy/LOM-UniMI-L153/2020 | EPI_ISL_542148 | 3/15/20 |
| hCoV-19/Italy/LOM-UniMI-L154/2020 | EPI_ISL_542149 | 3/21/20 |
| hCoV-19/Italy/LOM-UniMI-L155/2020 | EPI_ISL_542150 | 3/18/20 |
| hCoV-19/Italy/LOM-UniMI-L156/2020 | EPI_ISL_542151 | 3/19/20 |
| hCoV-19/Italy/LOM-UniMI-L157/2020 | EPI_ISL_542152 | 3/19/20 |
| hCoV-19/Italy/LOM-UniMI-L158/2020 | EPI_ISL_542153 | 3/19/20 |
| hCoV-19/Italy/LOM-UniMI-L159/2020 | EPI_ISL_542154 | 3/13/20 |
| hCoV-19/Italy/LOM-UniMI-L160/2020 | EPI_ISL_542155 | 3/25/20 |
| hCoV-19/Italy/LOM-UniMI-L162/2020 | EPI_ISL_542156 | 8/3/20  |
| hCoV-19/Italy/LOM-UniMI-L163/2020 | EPI_ISL_542157 | 3/3/20  |
| hCoV-19/Italy/LOM-UniMI-L164/2020 | EPI_ISL_542158 | 3/21/20 |
| hCoV-19/Italy/LOM-UniMI-L165/2020 | EPI_ISL_542159 | 3/18/20 |
| hCoV-19/Italy/LOM-UniMI-L166/2020 | EPI_ISL_542160 | 3/20/20 |
| hCoV-19/Italy/LOM-UniMI-L167/2020 | EPI_ISL_542161 | 3/15/20 |
| hCoV-19/Italy/LOM-UniMI-L168/2020 | EPI_ISL_542162 | 3/21/20 |
| hCoV-19/Italy/LOM-UniMI-L169/2020 | EPI_ISL_542163 | 3/14/20 |
| hCoV-19/Italy/LOM-UniMI-L170/2020 | EPI_ISL_542164 | 3/20/20 |
| hCoV-19/Italy/LOM-UniMI-L171/2020 | EPI_ISL_542165 | 3/21/20 |



|                                   |                |         |
|-----------------------------------|----------------|---------|
| hCoV-19/Italy/LOM-UniMI-L172/2020 | EPI_ISL_542166 | 3/19/20 |
| hCoV-19/Italy/LOM-UniMI-L173/2020 | EPI_ISL_542167 | 3/19/20 |
| hCoV-19/Italy/LOM-UniMI-L174/2020 | EPI_ISL_542168 | 3/21/20 |
| hCoV-19/Italy/LOM-UniMI-L175/2020 | EPI_ISL_542169 | 3/16/20 |
| hCoV-19/Italy/LOM-UniMI-L176/2020 | EPI_ISL_542170 | 3/21/20 |
| hCoV-19/Italy/LOM-UniMI-L177/2020 | EPI_ISL_542171 | 3/16/20 |
| hCoV-19/Italy/LOM-UniMI-L178/2020 | EPI_ISL_542172 | 3/21/20 |
| hCoV-19/Italy/LOM-UniMI-L182/2020 | EPI_ISL_542173 | 12/3/20 |
| hCoV-19/Italy/LOM-UniMI-L183/2020 | EPI_ISL_542174 | 3/21/20 |
| hCoV-19/Italy/LOM-UniMI-L184/2020 | EPI_ISL_542175 | 3/14/20 |
| hCoV-19/Italy/LOM-UniMI-L185/2020 | EPI_ISL_542176 | 3/19/20 |
| hCoV-19/Italy/LOM-UniMI-L186/2020 | EPI_ISL_542177 | 3/20/20 |
| hCoV-19/Italy/LOM-UniMI-L187/2020 | EPI_ISL_542178 | 3/18/20 |
| hCoV-19/Italy/LOM-UniMI-L189/2020 | EPI_ISL_542179 | 3/15/20 |
| hCoV-19/Italy/LOM-UniMI-L190/2020 | EPI_ISL_542180 | 10/3/20 |
| hCoV-19/Italy/LOM-UniMI-L191/2020 | EPI_ISL_542181 | 3/21/20 |
| hCoV-19/Italy/LOM-UniMI-L192/2020 | EPI_ISL_542182 | 3/21/20 |
| hCoV-19/Italy/LOM-UniMI-L193/2020 | EPI_ISL_542183 | 3/22/20 |
| hCoV-19/Italy/LOM-UniMI-L194/2020 | EPI_ISL_542184 | 3/22/20 |
| hCoV-19/Italy/LOM-UniMI-L195/2020 | EPI_ISL_542185 | 3/21/20 |
| hCoV-19/Italy/LOM-UniMI-L196/2020 | EPI_ISL_542186 | 3/22/20 |
| hCoV-19/Italy/LOM-UniMI-L197/2020 | EPI_ISL_542187 | 3/22/20 |
| hCoV-19/Italy/LOM-UniMI-L198/2020 | EPI_ISL_542188 | 3/21/20 |
| hCoV-19/Italy/LOM-UniMI-L199/2020 | EPI_ISL_542189 | 3/21/20 |
| hCoV-19/Italy/LOM-UniMI-L201/2020 | EPI_ISL_542190 | 3/22/20 |
| hCoV-19/Italy/LOM-UniMI-L203/2020 | EPI_ISL_542191 | 3/22/20 |
| hCoV-19/Italy/LOM-UniMI-L204/2020 | EPI_ISL_542192 | 8/3/20  |
| hCoV-19/Italy/LOM-UniMI-L205/2020 | EPI_ISL_542193 | 3/3/20  |
| hCoV-19/Italy/LOM-UniMI-L206/2020 | EPI_ISL_542194 | 8/3/20  |
| hCoV-19/Italy/LOM-UniMI-L207/2020 | EPI_ISL_542195 | 10/3/20 |
| hCoV-19/Italy/LOM-UniMI-L208/2020 | EPI_ISL_542196 | 7/3/20  |
| hCoV-19/Italy/LOM-UniMI-L210/2020 | EPI_ISL_542197 | 12/3/20 |
| hCoV-19/Italy/LOM-UniMI-L211/2020 | EPI_ISL_542198 | 12/3/20 |
| hCoV-19/Italy/LOM-UniMI-L212/2020 | EPI_ISL_542199 | 3/14/20 |
| hCoV-19/Italy/LOM-UniMI-L213/2020 | EPI_ISL_542200 | 12/3/20 |
| hCoV-19/Italy/LOM-UniMI-L214/2020 | EPI_ISL_542201 | 12/3/20 |
| hCoV-19/Italy/LOM-UniMI-L215/2020 | EPI_ISL_542202 | 12/3/20 |
| hCoV-19/Italy/LOM-UniMI-L216/2020 | EPI_ISL_542203 | 3/13/20 |
| hCoV-19/Italy/LOM-UniMI-L217/2020 | EPI_ISL_542204 | 3/15/20 |
| hCoV-19/Italy/LOM-UniMI-L218/2020 | EPI_ISL_542205 | 10/3/20 |
| hCoV-19/Italy/LOM-UniMI-L219/2020 | EPI_ISL_542206 | 3/15/20 |
| hCoV-19/Italy/LOM-UniMI-L220/2020 | EPI_ISL_542207 | 11/3/20 |
| hCoV-19/Italy/LOM-UniMI-L221/2020 | EPI_ISL_542208 | 3/14/20 |
| hCoV-19/Italy/LOM-UniMI-L222/2020 | EPI_ISL_542209 | 3/13/20 |
| hCoV-19/Italy/LOM-UniMI-L223/2020 | EPI_ISL_542210 | 3/13/20 |

|                                   |                |         |
|-----------------------------------|----------------|---------|
| hCoV-19/Italy/LOM-UniMI-L224/2020 | EPI_ISL_542211 | 3/13/20 |
| hCoV-19/Italy/LOM-UniMI-L225/2020 | EPI_ISL_542212 | 3/14/20 |
| hCoV-19/Italy/LOM-UniMI-L226/2020 | EPI_ISL_542213 | 3/14/20 |
| hCoV-19/Italy/LOM-UniMI-L227/2020 | EPI_ISL_542214 | 3/14/20 |
| hCoV-19/Italy/LOM-UniMI-L228/2020 | EPI_ISL_542215 | 11/3/20 |
| hCoV-19/Italy/LOM-UniMI-L229/2020 | EPI_ISL_542216 | 11/3/20 |
| hCoV-19/Italy/LOM-UniMI-L230/2020 | EPI_ISL_542217 | 2/23/20 |
| hCoV-19/Italy/LOM-UniMI-L239/2020 | EPI_ISL_542218 | 4/3/20  |
| hCoV-19/Italy/LOM-UniMI-L240/2020 | EPI_ISL_542219 | 9/3/20  |
| hCoV-19/Italy/LOM-UniMI-L242/2020 | EPI_ISL_542220 | 9/3/20  |
| hCoV-19/Italy/LOM-UniMI-L249/2020 | EPI_ISL_542221 | 2/22/20 |
| hCoV-19/Italy/LOM-UniMI-L250/2020 | EPI_ISL_542222 | 2/22/20 |
| hCoV-19/Italy/LOM-UniMI-L251/2020 | EPI_ISL_542223 | 2/22/20 |
| hCoV-19/Italy/LOM-UniMI-L252/2020 | EPI_ISL_542224 | 2/22/20 |
| hCoV-19/Italy/LOM-UniMI-L253/2020 | EPI_ISL_542225 | 2/23/20 |
| hCoV-19/Italy/LOM-UniMI-L254/2020 | EPI_ISL_542226 | 2/23/20 |
| hCoV-19/Italy/LOM-UniMI-L257/2020 | EPI_ISL_542228 | 2/23/20 |
| hCoV-19/Italy/LOM-UniMI-L259/2020 | EPI_ISL_542229 | 2/24/20 |
| hCoV-19/Italy/LOM-UniMI-L260/2020 | EPI_ISL_542230 | 2/24/20 |
| hCoV-19/Italy/LOM-UniMI-L261/2020 | EPI_ISL_542231 | 2/24/20 |
| hCoV-19/Italy/LOM-UniMI-L265/2020 | EPI_ISL_542232 | 2/24/20 |
| hCoV-19/Italy/LOM-UniMI-L267/2020 | EPI_ISL_542233 | 2/24/20 |
| hCoV-19/Italy/LOM-UniMI-L268/2020 | EPI_ISL_542234 | 2/25/20 |
| hCoV-19/Italy/LOM-UniMI-L269/2020 | EPI_ISL_542235 | 2/25/20 |
| hCoV-19/Italy/LOM-UniMI-L270/2020 | EPI_ISL_542236 | 2/25/20 |
| hCoV-19/Italy/LOM-UniMI-L271/2020 | EPI_ISL_542237 | 2/25/20 |
| hCoV-19/Italy/LOM-UniMI-L272/2020 | EPI_ISL_542238 | 2/25/20 |
| hCoV-19/Italy/LOM-UniMI-L273/2020 | EPI_ISL_542239 | 2/25/20 |
| hCoV-19/Italy/LOM-UniMI-L274/2020 | EPI_ISL_542240 | 2/25/20 |
| hCoV-19/Italy/LOM-UniMI-L276/2020 | EPI_ISL_542241 | 2/26/20 |
| hCoV-19/Italy/LOM-UniMI-L278/2020 | EPI_ISL_542242 | 2/27/20 |
| hCoV-19/Italy/LOM-UniMI-L279/2020 | EPI_ISL_542243 | 2/28/20 |
| hCoV-19/Italy/LOM-UniMI-L280/2020 | EPI_ISL_542244 | 2/28/20 |
| hCoV-19/Italy/LOM-UniMI-L281/2020 | EPI_ISL_542245 | 2/28/20 |
| hCoV-19/Italy/LOM-UniMI-L282/2020 | EPI_ISL_542246 | 2/28/20 |
| hCoV-19/Italy/LOM-UniMI-L283/2020 | EPI_ISL_542247 | 2/28/20 |
| hCoV-19/Italy/LOM-UniMI-L284/2020 | EPI_ISL_542248 | 2/28/20 |
| hCoV-19/Italy/LOM-UniMI-L285/2020 | EPI_ISL_542249 | 2/28/20 |
| hCoV-19/Italy/LOM-UniMI-L286/2020 | EPI_ISL_542250 | 2/28/20 |
| hCoV-19/Italy/LOM-UniMI-L287/2020 | EPI_ISL_542251 | 2/28/20 |
| hCoV-19/Italy/LOM-UniMI-L288/2020 | EPI_ISL_542252 | 2/28/20 |
| hCoV-19/Italy/LOM-UniMI-L289/2020 | EPI_ISL_542253 | 2/29/20 |
| hCoV-19/Italy/LOM-UniMI-L290/2020 | EPI_ISL_542254 | 2/29/20 |
| hCoV-19/Italy/LOM-UniMI-L292/2020 | EPI_ISL_542255 | 2/29/20 |
| hCoV-19/Italy/LOM-UniMI-L293/2020 | EPI_ISL_542256 | 2/29/20 |

|                                   |                |         |
|-----------------------------------|----------------|---------|
| hCoV-19/Italy/LOM-UniMI-L294/2020 | EPI_ISL_542257 | 2/29/20 |
| hCoV-19/Italy/LOM-UniMI-L295/2020 | EPI_ISL_542258 | 2/29/20 |
| hCoV-19/Italy/LOM-UniMI-L296/2020 | EPI_ISL_542259 | 2/29/20 |
| hCoV-19/Italy/LOM-UniMI-L299/2020 | EPI_ISL_542260 | 2/29/20 |
| hCoV-19/Italy/LOM-UniMI-L302/2020 | EPI_ISL_542261 | 2/29/20 |
| hCoV-19/Italy/LOM-UniMI-L309/2020 | EPI_ISL_542262 | 2/29/20 |
| hCoV-19/Italy/LOM-UniMI-L310/2020 | EPI_ISL_542263 | 2/29/20 |
| hCoV-19/Italy/LOM-UniMI-L311/2020 | EPI_ISL_542264 | 1/3/20  |
| hCoV-19/Italy/LOM-UniMI-L313/2020 | EPI_ISL_542265 | 1/3/20  |
| hCoV-19/Italy/LOM-UniMI-L314/2020 | EPI_ISL_542266 | 1/3/20  |
| hCoV-19/Italy/LOM-UniMI-L316/2020 | EPI_ISL_542267 | 1/3/20  |
| hCoV-19/Italy/LOM-UniMI-L317/2020 | EPI_ISL_542268 | 1/3/20  |
| hCoV-19/Italy/LOM-UniMI-L318/2020 | EPI_ISL_542269 | 1/3/20  |
| hCoV-19/Italy/LOM-UniMI-L319/2020 | EPI_ISL_542270 | 1/3/20  |
| hCoV-19/Italy/LOM-UniMI-L321/2020 | EPI_ISL_542271 | 1/3/20  |
| hCoV-19/Italy/LOM-UniMI-L322/2020 | EPI_ISL_542272 | 1/3/20  |
| hCoV-19/Italy/LOM-UniMI-L325/2020 | EPI_ISL_542273 | 1/3/20  |
| hCoV-19/Italy/LOM-UniMI-L327/2020 | EPI_ISL_542274 | 2/3/20  |
| hCoV-19/Italy/LOM-UniMI-L328/2020 | EPI_ISL_542275 | 2/3/20  |
| hCoV-19/Italy/LOM-UniMI-L329/2020 | EPI_ISL_542276 | 2/3/20  |
| hCoV-19/Italy/LOM-UniMI-L330/2020 | EPI_ISL_542277 | 2/3/20  |
| hCoV-19/Italy/LOM-UniMI-L331/2020 | EPI_ISL_542278 | 3/3/20  |
| hCoV-19/Italy/LOM-UniMI-L334/2020 | EPI_ISL_542279 | 3/3/20  |
| hCoV-19/Italy/LOM-UniMI-L335/2020 | EPI_ISL_542280 | 3/3/20  |
| hCoV-19/Italy/LOM-UniMI-L342/2020 | EPI_ISL_542281 | 4/3/20  |
| hCoV-19/Italy/LOM-UniMI-L343/2020 | EPI_ISL_542282 | 4/3/20  |
| hCoV-19/Italy/LOM-UniMI-L345/2020 | EPI_ISL_542283 | 4/3/20  |
| hCoV-19/Italy/LOM-UniMI-L346/2020 | EPI_ISL_542284 | 4/3/20  |
| hCoV-19/Italy/LOM-UniMI-L347/2020 | EPI_ISL_542285 | 4/3/20  |
| hCoV-19/Italy/LOM-UniMI-L348/2020 | EPI_ISL_542286 | 5/3/20  |
| hCoV-19/Italy/LOM-UniMI-L350/2020 | EPI_ISL_542287 | 5/3/20  |
| hCoV-19/Italy/LOM-UniMI-L352/2020 | EPI_ISL_542288 | 5/3/20  |
| hCoV-19/Italy/LOM-UniMI-L354/2020 | EPI_ISL_542289 | 5/3/20  |
| hCoV-19/Italy/LOM-UniMI-L356/2020 | EPI_ISL_542290 | 5/3/20  |
| hCoV-19/Italy/LOM-UniMI-L357/2020 | EPI_ISL_542291 | 5/3/20  |
| hCoV-19/Italy/LOM-UniMI-L358/2020 | EPI_ISL_542292 | 5/3/20  |
| hCoV-19/Italy/LOM-UniMI-L361/2020 | EPI_ISL_542293 | 5/3/20  |
| hCoV-19/Italy/LOM-UniMI-L362/2020 | EPI_ISL_542294 | 5/3/20  |
| hCoV-19/Italy/LOM-UniMI-L363/2020 | EPI_ISL_542295 | 6/3/20  |
| hCoV-19/Italy/LOM-UniMI-L364/2020 | EPI_ISL_542296 | 6/3/20  |
| hCoV-19/Italy/LOM-UniMI-L366/2020 | EPI_ISL_542297 | 7/3/20  |
| hCoV-19/Italy/LOM-UniMI-L367/2020 | EPI_ISL_542298 | 7/3/20  |
| hCoV-19/Italy/LOM-UniMI-L368/2020 | EPI_ISL_542299 | 7/3/20  |
| hCoV-19/Italy/LOM-UniMI-L369/2020 | EPI_ISL_542300 | 7/3/20  |
| hCoV-19/Italy/LOM-UniMI-L370/2020 | EPI_ISL_542301 | 7/3/20  |

|                                   |                |         |
|-----------------------------------|----------------|---------|
| hCoV-19/Italy/LOM-UniMI-L371/2020 | EPI_ISL_542302 | 7/3/20  |
| hCoV-19/Italy/LOM-UniMI-L372/2020 | EPI_ISL_542303 | 7/3/20  |
| hCoV-19/Italy/LOM-UniMI-L373/2020 | EPI_ISL_542304 | 8/3/20  |
| hCoV-19/Italy/LOM-UniMI-L378/2020 | EPI_ISL_542305 | 8/3/20  |
| hCoV-19/Italy/LOM-UniMI-L380/2020 | EPI_ISL_542306 | 8/3/20  |
| hCoV-19/Italy/LOM-UniMI-L384/2020 | EPI_ISL_542307 | 9/3/20  |
| hCoV-19/Italy/LOM-UniMI-L385/2020 | EPI_ISL_542308 | 9/3/20  |
| hCoV-19/Italy/LOM-UniMI-L386/2020 | EPI_ISL_542309 | 9/3/20  |
| hCoV-19/Italy/LOM-UniMI-L387/2020 | EPI_ISL_542310 | 9/3/20  |
| hCoV-19/Italy/LOM-UniMI-L388/2020 | EPI_ISL_542311 | 9/3/20  |
| hCoV-19/Italy/LOM-UniMI-L389/2020 | EPI_ISL_542312 | 9/3/20  |
| hCoV-19/Italy/LOM-UniMI-L390/2020 | EPI_ISL_542313 | 9/3/20  |
| hCoV-19/Italy/LOM-UniMI-L391/2020 | EPI_ISL_542314 | 9/3/20  |
| hCoV-19/Italy/LOM-UniMI-L393/2020 | EPI_ISL_542315 | 9/3/20  |
| hCoV-19/Italy/LOM-UniMI-L394/2020 | EPI_ISL_542316 | 9/3/20  |
| hCoV-19/Italy/LOM-UniMI-L395/2020 | EPI_ISL_542317 | 9/3/20  |
| hCoV-19/Italy/LOM-UniMI-L396/2020 | EPI_ISL_542318 | 9/3/20  |
| hCoV-19/Italy/LOM-UniMI-L397/2020 | EPI_ISL_542319 | 9/3/20  |
| hCoV-19/Italy/LOM-UniMI-L398/2020 | EPI_ISL_542320 | 3/13/20 |
| hCoV-19/Italy/LOM-UniMI-L399/2020 | EPI_ISL_542321 | 6/3/20  |
| hCoV-19/Italy/LOM-UniMI-L400/2020 | EPI_ISL_542322 | 12/3/20 |
| hCoV-19/Italy/LOM-UniMI-L401/2020 | EPI_ISL_542323 | 3/14/20 |
| hCoV-19/Italy/LOM-UniMI-L402/2020 | EPI_ISL_542324 | 3/13/20 |
| hCoV-19/Italy/LOM-UniMI-L403/2020 | EPI_ISL_542325 | 3/15/20 |
| hCoV-19/Italy/LOM-UniMI-L404/2020 | EPI_ISL_542326 | 3/14/20 |
| hCoV-19/Italy/LOM-UniMI-L406/2020 | EPI_ISL_542327 | 3/16/20 |
| hCoV-19/Italy/LOM-UniMI-L407/2020 | EPI_ISL_542328 | 3/13/20 |
| hCoV-19/Italy/LOM-UniMI-L409/2020 | EPI_ISL_542329 | 12/3/20 |
| hCoV-19/Italy/LOM-UniMI-L410/2020 | EPI_ISL_542330 | 3/3/20  |
| hCoV-19/Italy/LOM-UniMI-L411/2020 | EPI_ISL_542331 | 1/3/20  |
| hCoV-19/Italy/LOM-UniMI-L412/2020 | EPI_ISL_542332 | 3/14/20 |
| hCoV-19/Italy/LOM-UniMI-L413/2020 | EPI_ISL_542333 | 3/16/20 |
| hCoV-19/Italy/LOM-UniMI-L414/2020 | EPI_ISL_542334 | 3/16/20 |
| hCoV-19/Italy/LOM-UniMI-L415/2020 | EPI_ISL_542335 | 3/17/20 |
| hCoV-19/Italy/LOM-UniMI-L416/2020 | EPI_ISL_542336 | 3/16/20 |
| hCoV-19/Italy/LOM-UniMI-L418/2020 | EPI_ISL_542337 | 3/18/20 |
| hCoV-19/Italy/LOM-UniMI-L419/2020 | EPI_ISL_542338 | 12/3/20 |
| hCoV-19/Italy/LOM-UniMI-L420/2020 | EPI_ISL_542339 | 3/18/20 |
| hCoV-19/Italy/LOM-UniMI-L421/2020 | EPI_ISL_542340 | 3/17/20 |
| hCoV-19/Italy/LOM-UniMI-L422/2020 | EPI_ISL_542341 | 3/18/20 |
| hCoV-19/Italy/LOM-UniMI-L423/2020 | EPI_ISL_542342 | 3/19/20 |
| hCoV-19/Italy/LOM-UniMI-L424/2020 | EPI_ISL_542343 | 3/17/20 |
| hCoV-19/Italy/LOM-UniMI-L425/2020 | EPI_ISL_542344 | 10/3/20 |
| hCoV-19/Italy/LOM-UniMI-L426/2020 | EPI_ISL_542345 | 10/3/20 |
| hCoV-19/Italy/LOM-UniMI-L427/2020 | EPI_ISL_542346 | 3/15/20 |

|                                   |                |         |
|-----------------------------------|----------------|---------|
| hCoV-19/Italy/LOM-UniMI-L428/2020 | EPI_ISL_542347 | 5/3/20  |
| hCoV-19/Italy/LOM-UniMI-L429/2020 | EPI_ISL_542348 | 3/17/20 |
| hCoV-19/Italy/LOM-UniMI-L430/2020 | EPI_ISL_542349 | 3/19/20 |
| hCoV-19/Italy/LOM-UniMI-L431/2020 | EPI_ISL_542350 | 3/20/20 |
| hCoV-19/Italy/LOM-UniMI-L432/2020 | EPI_ISL_542351 | 3/19/20 |
| hCoV-19/Italy/LOM-UniMI-L433/2020 | EPI_ISL_542352 | 3/20/20 |
| hCoV-19/Italy/LOM-UniMI-L434/2020 | EPI_ISL_542353 | 3/20/20 |
| hCoV-19/Italy/LOM-UniMI-L435/2020 | EPI_ISL_542354 | 3/20/20 |
| hCoV-19/Italy/LOM-UniMI-L436/2020 | EPI_ISL_542355 | 3/19/20 |
| hCoV-19/Italy/LOM-UniMI-L437/2020 | EPI_ISL_542356 | 3/19/20 |
| hCoV-19/Italy/LOM-UniMI-L438/2020 | EPI_ISL_542357 | 3/21/20 |
| hCoV-19/Italy/LOM-UniMI-L439/2020 | EPI_ISL_542358 | 3/28/20 |
| hCoV-19/Italy/LOM-UniMI-L440/2020 | EPI_ISL_542359 | 3/22/20 |
| hCoV-19/Italy/LOM-UniMI-L441/2020 | EPI_ISL_542360 | 2/3/20  |
| hCoV-19/Italy/LOM-UniMI-L442/2020 | EPI_ISL_542361 | 3/22/20 |
| hCoV-19/Italy/LOM-UniMI-L443/2020 | EPI_ISL_542362 | 3/25/20 |
| hCoV-19/Italy/LOM-UniMI-L444/2020 | EPI_ISL_542363 | 3/20/20 |
| hCoV-19/Italy/LOM-UniMI-L445/2020 | EPI_ISL_542364 | 3/14/20 |
| hCoV-19/Italy/LOM-UniMI-L447/2020 | EPI_ISL_542365 | 3/23/20 |
| hCoV-19/Italy/LOM-UniMI-L448/2020 | EPI_ISL_542366 | 3/18/20 |
| hCoV-19/Italy/LOM-UniMI-L449/2020 | EPI_ISL_542367 | 3/22/20 |
| hCoV-19/Italy/LOM-UniMI-L450/2020 | EPI_ISL_542368 | 3/23/20 |
| hCoV-19/Italy/LOM-UniMI-L451/2020 | EPI_ISL_542369 | 3/13/20 |
| hCoV-19/Italy/LOM-UniMI-L452/2020 | EPI_ISL_542370 | 3/24/20 |
| hCoV-19/Italy/LOM-UniMI-L453/2020 | EPI_ISL_542371 | 3/21/20 |
| hCoV-19/Italy/LOM-UniMI-L454/2020 | EPI_ISL_542372 | 3/25/20 |
| hCoV-19/Italy/LOM-UniMI-L455/2020 | EPI_ISL_542373 | 3/25/20 |
| hCoV-19/Italy/LOM-UniMI-L457/2020 | EPI_ISL_542374 | 3/25/20 |
| hCoV-19/Italy/LOM-UniMI-L458/2020 | EPI_ISL_542375 | 3/25/20 |
| hCoV-19/Italy/LOM-UniMI-L459/2020 | EPI_ISL_542376 | 3/13/20 |
| hCoV-19/Italy/LOM-UniMI-L461/2020 | EPI_ISL_542377 | 3/25/20 |
| hCoV-19/Italy/LOM-UniMI-L462/2020 | EPI_ISL_542378 | 3/16/20 |
| hCoV-19/Italy/LOM-UniMI-L463/2020 | EPI_ISL_542379 | 3/23/20 |
| hCoV-19/Italy/LOM-UniMI-L464/2020 | EPI_ISL_542380 | 3/27/20 |
| hCoV-19/Italy/LOM-UniMI-L465/2020 | EPI_ISL_542381 | 3/20/20 |
| hCoV-19/Italy/LOM-UniMI-L469/2020 | EPI_ISL_542382 | 3/28/20 |
| hCoV-19/Italy/LOM-UniMI-L470/2020 | EPI_ISL_542383 | 3/23/20 |
| hCoV-19/Italy/LOM-UniMI-L471/2020 | EPI_ISL_542384 | 3/28/20 |
| hCoV-19/Italy/LOM-UniMI-L472/2020 | EPI_ISL_542385 | 3/18/20 |
| hCoV-19/Italy/LOM-UniMI-L473/2020 | EPI_ISL_542386 | 3/30/20 |
| hCoV-19/Italy/LOM-UniMI-L474/2020 | EPI_ISL_542387 | 3/30/20 |
| hCoV-19/Italy/LOM-UniMI-L475/2020 | EPI_ISL_542388 | 3/30/20 |
| hCoV-19/Italy/LOM-UniMI-L476/2020 | EPI_ISL_542389 | 1/4/20  |
| hCoV-19/Italy/LOM-UniMI-L477/2020 | EPI_ISL_542390 | 3/31/20 |
| hCoV-19/Italy/LOM-UniMI-L478/2020 | EPI_ISL_542391 | 12/3/20 |

|                                   |                |         |
|-----------------------------------|----------------|---------|
| hCoV-19/Italy/LOM-UniMI-L480/2020 | EPI_ISL_542392 | 3/31/20 |
| hCoV-19/Italy/LOM-UniMI-L485/2020 | EPI_ISL_542393 | 3/17/20 |
| hCoV-19/Italy/LOM-UniMI-L486/2020 | EPI_ISL_542394 | 3/17/20 |
| hCoV-19/Italy/LOM-UniMI-L487/2020 | EPI_ISL_542395 | 3/27/20 |
| hCoV-19/Italy/LOM-UniMI-L491/2020 | EPI_ISL_542396 | 3/20/20 |
| hCoV-19/Italy/LOM-UniMI-L492/2020 | EPI_ISL_542397 | 3/20/20 |
| hCoV-19/Italy/LOM-UniMI-L493/2020 | EPI_ISL_542398 | 3/21/20 |
| hCoV-19/Italy/LOM-UniMI-L494/2020 | EPI_ISL_542399 | 3/21/20 |
| hCoV-19/Italy/LOM-UniMI-L53/2020  | EPI_ISL_542400 | 2/3/20  |
| hCoV-19/Italy/LOM-UniMI-L54/2020  | EPI_ISL_542401 | 2/26/20 |
| hCoV-19/Italy/LOM-UniMI-L55/2020  | EPI_ISL_542402 | 2/3/20  |
| hCoV-19/Italy/LOM-UniMI-L56/2020  | EPI_ISL_542403 | 3/3/20  |
| hCoV-19/Italy/LOM-UniMI-L57/2020  | EPI_ISL_542404 | 4/3/20  |
| hCoV-19/Italy/LOM-UniMI-L58/2020  | EPI_ISL_542405 | 4/3/20  |
| hCoV-19/Italy/LOM-UniMI-L60/2020  | EPI_ISL_542406 | 2/27/20 |
| hCoV-19/Italy/LOM-UniMI-L61/2020  | EPI_ISL_542407 | 2/3/20  |
| hCoV-19/Italy/LOM-UniMI-L62/2020  | EPI_ISL_542408 | 4/3/20  |
| hCoV-19/Italy/LOM-UniMI-L63/2020  | EPI_ISL_542409 | 3/3/20  |
| hCoV-19/Italy/LOM-UniMI-L64/2020  | EPI_ISL_542410 | 2/25/20 |
| hCoV-19/Italy/LOM-UniMI-L65/2020  | EPI_ISL_542411 | 2/3/20  |
| hCoV-19/Italy/LOM-UniMI-L66/2020  | EPI_ISL_542412 | 2/29/20 |
| hCoV-19/Italy/LOM-UniMI-L67/2020  | EPI_ISL_542413 | 5/3/20  |
| hCoV-19/Italy/LOM-UniMI-L68/2020  | EPI_ISL_542414 | 4/3/20  |
| hCoV-19/Italy/LOM-UniMI-L69/2020  | EPI_ISL_542415 | 1/3/20  |
| hCoV-19/Italy/LOM-UniMI-L70/2020  | EPI_ISL_542416 | 6/3/20  |
| hCoV-19/Italy/LOM-UniMI-L71/2020  | EPI_ISL_542417 | 4/3/20  |
| hCoV-19/Italy/LOM-UniMI-L73/2020  | EPI_ISL_542418 | 9/3/20  |
| hCoV-19/Italy/LOM-UniMI-L74/2020  | EPI_ISL_542419 | 8/3/20  |
| hCoV-19/Italy/LOM-UniMI-L75/2020  | EPI_ISL_542420 | 3/3/20  |
| hCoV-19/Italy/LOM-UniMI-L76/2020  | EPI_ISL_542421 | 5/3/20  |
| hCoV-19/Italy/LOM-UniMI-L77/2020  | EPI_ISL_542422 | 6/3/20  |
| hCoV-19/Italy/LOM-UniMI-L78/2020  | EPI_ISL_542423 | 6/3/20  |
| hCoV-19/Italy/LOM-UniMI-L79/2020  | EPI_ISL_542424 | 3/3/20  |
| hCoV-19/Italy/LOM-UniMI-L80/2020  | EPI_ISL_542425 | 10/3/20 |
| hCoV-19/Italy/LOM-UniMI-L81/2020  | EPI_ISL_542426 | 8/3/20  |
| hCoV-19/Italy/LOM-UniMI-L83/2020  | EPI_ISL_542427 | 11/3/20 |
| hCoV-19/Italy/LOM-UniMI-L84/2020  | EPI_ISL_542428 | 10/3/20 |
| hCoV-19/Italy/LOM-UniMI-L85/2020  | EPI_ISL_542429 | 2/3/20  |
| hCoV-19/Italy/LOM-UniMI-L86/2020  | EPI_ISL_542430 | 4/3/20  |
| hCoV-19/Italy/LOM-UniMI-L87/2020  | EPI_ISL_542431 | 10/3/20 |
| hCoV-19/Italy/LOM-UniMI-L88/2020  | EPI_ISL_542432 | 8/3/20  |
| hCoV-19/Italy/LOM-UniMI-L89/2020  | EPI_ISL_542433 | 10/3/20 |
| hCoV-19/Italy/LOM-UniMI-L90/2020  | EPI_ISL_542434 | 9/3/20  |
| hCoV-19/Italy/LOM-UniMI-L91/2020  | EPI_ISL_542435 | 11/3/20 |
| hCoV-19/Italy/LOM-UniMI-L92/2020  | EPI_ISL_542436 | 10/3/20 |

|                                       |                |         |
|---------------------------------------|----------------|---------|
| hCoV-19/Italy/LOM-UniMI-L93/2020      | EPI_ISL_542437 | 8/3/20  |
| hCoV-19/Italy/LOM-UniMI-L94/2020      | EPI_ISL_542438 | 10/3/20 |
| hCoV-19/Italy/LOM-UniMI-L95/2020      | EPI_ISL_542439 | 8/3/20  |
| hCoV-19/Italy/LOM-UniMI-L96/2020      | EPI_ISL_542440 | 6/3/20  |
| hCoV-19/Italy/LOM-UniMI-L97/2020      | EPI_ISL_542441 | 9/3/20  |
| hCoV-19/Italy/LOM-UniMI-L98/2020      | EPI_ISL_542442 | 2/26/20 |
| hCoV-19/Italy/LOM-UniMI-L99/2020      | EPI_ISL_542443 | 10/3/20 |
| hCoV-19/Italy/CAM-IZSM-52479-129/2020 | EPI_ISL_560407 | 5/13/20 |
| hCoV-19/Italy/LOM-INMI-10734/2020     | EPI_ISL_568579 | 2/24/20 |
| hCoV-19/Italy/PIE-SLL-NZ145/2020      | EPI_ISL_569865 | 8/4/20  |
| hCoV-19/Italy/PIE-SLL-MS45/2020       | EPI_ISL_569866 | 2/25/20 |
| hCoV-19/Italy/PIE-SLL-MS46/2020       | EPI_ISL_569867 | 2/22/20 |
| hCoV-19/Italy/PIE-SLL-MS52/2020       | EPI_ISL_569868 | 1/4/20  |
| hCoV-19/Italy/PIE-SLL-MS53/2020       | EPI_ISL_569869 | 3/31/20 |
| hCoV-19/Italy/PIE-SLL-MS54/2020       | EPI_ISL_569870 | 3/31/20 |
| hCoV-19/Italy/PIE-SLL-MS55/2020       | EPI_ISL_569871 | 3/31/20 |
| hCoV-19/Italy/PIE-SLL-MS56/2020       | EPI_ISL_569872 | 3/31/20 |
| hCoV-19/Italy/PIE-SLL-MS57/2020       | EPI_ISL_569873 | 3/31/20 |
| hCoV-19/Italy/PIE-SLL-MS58/2020       | EPI_ISL_569874 | 3/31/20 |
| hCoV-19/Italy/PIE-SLL-MS59/2020       | EPI_ISL_569875 | 3/31/20 |
| hCoV-19/Italy/PIE-SLL-MS61/2020       | EPI_ISL_569876 | 3/31/20 |
| hCoV-19/Italy/PIE-SLL-MS62/2020       | EPI_ISL_569877 | 3/31/20 |
| hCoV-19/Italy/PIE-SLL-MS63/2020       | EPI_ISL_569878 | 1/4/20  |
| hCoV-19/Italy/PIE-SLL-NZ138/2020      | EPI_ISL_569879 | 1/4/20  |
| hCoV-19/Italy/PIE-SLL-NZ140/2020      | EPI_ISL_569880 | 3/31/20 |
| hCoV-19/Italy/PIE-SLL-NZ141/2020      | EPI_ISL_569881 | 1/4/20  |
| hCoV-19/Italy/PIE-SLL-NZ142/2020      | EPI_ISL_569882 | 1/4/20  |
| hCoV-19/Italy/PIE-SLL-NZ144/2020      | EPI_ISL_569883 | 8/4/20  |
| hCoV-19/Italy/PIE-SLL-NZ146/2020      | EPI_ISL_569884 | 8/4/20  |
| hCoV-19/Italy/PIE-SLL-NZ147/2020      | EPI_ISL_569885 | 8/4/20  |
| hCoV-19/Italy/PIE-SLL-NZ148/2020      | EPI_ISL_569886 | 8/4/20  |
| hCoV-19/Italy/CAM-IZSM-112/2020       | EPI_ISL_572320 | 12/9/20 |
| hCoV-19/Italy/CAM-IZSM-129/2020       | EPI_ISL_572321 | 12/9/20 |
| hCoV-19/Italy/CAM-IZSM-166/2020       | EPI_ISL_572322 | 12/9/20 |
| hCoV-19/Italy/CAM-IZSM-172/2020       | EPI_ISL_572323 | 12/9/20 |
| hCoV-19/Italy/CAM-IZSM-32830/2020     | EPI_ISL_572324 | 3/28/20 |
| hCoV-19/Italy/TUS-DBM-1/2020          | EPI_ISL_582123 | 1/3/20  |
| hCoV-19/Italy/SIC-IZSBM169-56/2020    | EPI_ISL_582692 | 2020-06 |
| hCoV-19/Italy/SIC-IZSBM169-70/2020    | EPI_ISL_582693 | 2020-06 |
| hCoV-19/Italy/SIC-IZSBM169-76/2020    | EPI_ISL_582694 | 2020-06 |
| hCoV-19/Italy/SIC-IZSBM169-66/2020    | EPI_ISL_582767 | 2020-06 |
| hCoV-19/Italy/SIC-IZSBM169-55/2020    | EPI_ISL_582769 | 2020-06 |
| hCoV-19/Italy/SIC-IZSBM169-59/2020    | EPI_ISL_582810 | 2020-06 |
| hCoV-19/Italy/SIC-IZSBM169-60/2020    | EPI_ISL_582811 | 2020-06 |
| hCoV-19/Italy/SIC-IZSBM169-64/2020    | EPI_ISL_582833 | 2020-06 |

|                                    |                |         |
|------------------------------------|----------------|---------|
| hCoV-19/Italy/SIC-IZSBM193-88/2020 | EPI_ISL_582842 | 2020-06 |
| hCoV-19/Italy/SIC-IZSBM193-69/2020 | EPI_ISL_582845 | 2020-06 |
| hCoV-19/Italy/SIC-IZSBM193-67/2020 | EPI_ISL_582846 | 2020-06 |
| hCoV-19/Italy/SIC-IZSBM194-48/2020 | EPI_ISL_582847 | 2020-06 |
| hCoV-19/Italy/SIC-IZSBM194-11/2020 | EPI_ISL_582848 | 2020-06 |
| hCoV-19/Italy/SIC-IZSBM193-72/2020 | EPI_ISL_582849 | 2020-06 |
| hCoV-19/Italy/SIC-IZSBM193-85/2020 | EPI_ISL_582850 | 2020-06 |
| hCoV-19/Italy/TUS-DBM-2/2020       | EPI_ISL_583953 | 2020-03 |
| hCoV-19/Italy/TUS-DBM-10/2020      | EPI_ISL_583954 | 3/21/20 |
| hCoV-19/Italy/TUS-DBM-11/2020      | EPI_ISL_583955 | 3/21/20 |
| hCoV-19/Italy/TUS-DBM-18/2020      | EPI_ISL_583956 | 7/6/20  |
| hCoV-19/Italy/TUS-DBM-19/2020      | EPI_ISL_583957 | 7/6/20  |
| hCoV-19/Italy/TUS-DBM-21/2020      | EPI_ISL_583958 | 4/27/20 |
| hCoV-19/Italy/TUS-DBM-4/2020       | EPI_ISL_583959 | 3/23/20 |
| hCoV-19/Italy/TUS-DBM-6/2020       | EPI_ISL_583960 | 3/21/20 |
| hCoV-19/Italy/TUS-DBM-7/2020       | EPI_ISL_583961 | 3/20/20 |
| hCoV-19/Italy/TUS-DBM-8/2020       | EPI_ISL_583962 | 3/20/20 |
| hCoV-19/Italy/LOM-UniMI-ICCS1/2020 | EPI_ISL_584048 | 3/21/20 |
| hCoV-19/Italy/LOM-UniMI-ICCS2/2020 | EPI_ISL_584049 | 3/24/20 |
| hCoV-19/Italy/LOM-UniMI-ICCS3/2020 | EPI_ISL_584052 | 5/4/20  |
| hCoV-19/Italy/CAM-IZSM-43083/2020  | EPI_ISL_584069 | 1/10/20 |
| hCoV-19/Italy/CAM-IZSM-45946/2020  | EPI_ISL_602304 | 1/10/20 |
| hCoV-19/Italy/CAM-IZSM-45947/2020  | EPI_ISL_584071 | 1/10/20 |
| hCoV-19/Italy/CAM-IZSM-183/2020    | EPI_ISL_584072 | 12/9/20 |
| hCoV-19/Italy/LAZ-INMI-25/2020     | EPI_ISL_590693 | 7/7/20  |
| hCoV-19/Italy/LAZ-INMI-26/2020     | EPI_ISL_590694 | 7/7/20  |
| hCoV-19/Italy/LAZ-INMI-27/2020     | EPI_ISL_590695 | 7/7/20  |
| hCoV-19/Italy/LAZ-INMI-15/2020     | EPI_ISL_590696 | 7/7/20  |
| hCoV-19/Italy/LAZ-INMI-28/2020     | EPI_ISL_590697 | 7/7/20  |
| hCoV-19/Italy/LAZ-INMI-29/2020     | EPI_ISL_590698 | 7/7/20  |
| hCoV-19/Italy/SI-UOS-2/2020        | EPI_ISL_591326 | 2020-03 |
| hCoV-19/Italy/SI-UOS-10/2020       | EPI_ISL_591327 | 3/21/20 |
| hCoV-19/Italy/SI-UOS-11/2020       | EPI_ISL_591328 | 3/21/20 |
| hCoV-19/Italy/SI-UOS-18/2020       | EPI_ISL_591329 | 7/6/20  |
| hCoV-19/Italy/SI-UOS-19/2020       | EPI_ISL_591330 | 7/6/20  |
| hCoV-19/Italy/SI-UOS-21/2020       | EPI_ISL_591331 | 4/27/20 |
| hCoV-19/Italy/SI-UOS-4/2020        | EPI_ISL_591332 | 3/23/20 |
| hCoV-19/Italy/SI-UOS-6/2020        | EPI_ISL_591333 | 3/21/20 |
| hCoV-19/Italy/SI-UOS-07/2020       | EPI_ISL_591334 | 3/20/20 |
| hCoV-19/Italy/SI-UOS-8/2020        | EPI_ISL_591335 | 3/20/20 |



| <b>Location</b>                                        | <b>Host</b> | <b>Gender</b> | <b>Patient age</b> |
|--------------------------------------------------------|-------------|---------------|--------------------|
| Europe / Italy / Lazio / Rome                          | Human       | Female        | 66                 |
| Europe / Italy / Lombardy                              | Human       | Male          | 38                 |
| Europe / Italy / Lombardy / Milan                      | Human       | Female        | 38                 |
| Europe / Italy / Friuli Venezia Giulia                 | Human       | Female        | 59                 |
| Europe / Italy / Friuli Venezia Giulia                 | Human       | Male          | 73                 |
| Europe / Italy / Friuli Venezia Giulia                 | Human       | Male          | 45                 |
| Europe / Italy / Friuli Venezia Giulia                 | Human       | Male          | 59                 |
| Europe / Italy / Lombardy / Milan                      | Human       | Male          | 71                 |
| Europe / Italy / Lombardy / Milan                      | Human       | Male          | 80                 |
| Europe / Italy / Marche                                | Human       | Male          | 75                 |
| Europe / Italy / Lazio / Rome                          | Human       | Male          | 32                 |
| Europe / Italy / Lazio / Rome                          | Human       | Male          | 41                 |
| Europe / Italy / Lazio / Rome                          | Human       | Male          | 53                 |
| Europe / Italy / Abruzzo                               | Human       | Female        | 63                 |
| Europe / Italy / Abruzzo                               | Human       | Male          | 80                 |
| Europe / Italy / Abruzzo                               | Human       | Female        | 75                 |
| Europe / Italy / Abruzzo                               | Human       | Male          | 87                 |
| Europe / Italy / Abruzzo                               | Human       | Male          | 76                 |
| Europe / Italy / Abruzzo                               | Human       | Male          | 41                 |
| Europe / Italy / Lazio / Rome                          | Human       | Male          | 60                 |
| Europe / Italy / Lazio / Rome                          | Human       | Female        | 70                 |
| Europe / Italy / Abruzzo / Teramo                      | Human       | Male          | 68                 |
| Europe / Italy / Abruzzo / L'Aquila / Castel di Sangro | Human       | Male          | 54                 |
| Europe / Italy / Abruzzo / Teramo                      | Human       | Male          | 61                 |
| Europe / Italy / Abruzzo                               | Human       | Male          | 71                 |
| Europe / Italy / Abruzzo / L'Aquila                    | Human       | Male          | 64                 |
| Europe / Italy / Abruzzo                               | Human       | Male          | 43                 |
| Europe / Italy / Abruzzo                               | Human       | Male          | 86                 |
| Europe / Italy / Abruzzo                               | Human       | Male          | 38                 |
| Europe / Italy / Veneto / Verona                       | Human       | Male          | 55                 |
| Europe / Italy / Veneto / Verona                       | Human       | Female        | 56                 |
| Europe / Italy / Lazio / Rome                          | Human       | Female        | 65                 |
| Europe / Italy / Lazio / Rome                          | Human       | Male          | 33                 |
| Europe / Italy / Lazio / Rome                          | Human       | Male          | 56                 |
| Europe / Italy / Friuli Venezia Giulia                 | Human       | Male          | 63                 |
| Europe / Italy / Friuli Venezia Giulia                 | Human       | Male          | 61                 |
| Europe / Italy / Abruzzo                               | Human       | Male          | 26                 |
| Europe / Italy / Abruzzo                               | Human       | Male          | 62                 |
| Europe / Italy / Abruzzo                               | Human       | Male          | 60                 |
| Europe / Italy / Abruzzo                               | Human       | Male          | 66                 |
| Europe / Italy / Abruzzo                               | Human       | Male          | 70                 |
| Europe / Italy / Abruzzo                               | Human       | Male          | 85                 |
| Europe / Italy / Abruzzo                               | Human       | Female        | 96                 |
| Europe / Italy / Abruzzo                               | Human       | Male          | 67                 |

|                                  |       |         |         |
|----------------------------------|-------|---------|---------|
| Europe / Italy / Abruzzo         | Human | Male    | 36      |
| Europe / Italy / Abruzzo         | Human | Female  | 43      |
| Europe / Italy / Abruzzo         | Human | Female  | 49      |
| Europe / Italy / Abruzzo         | Human | Female  | 49      |
| Europe / Italy / Abruzzo         | Human | Female  | 54      |
| Europe / Italy / Abruzzo         | Human | Female  | 18      |
| Europe / Italy / Abruzzo         | Human | Male    | 35      |
| Europe / Italy / Abruzzo         | Human | Male    | 29      |
| Europe / Italy / Abruzzo         | Human | Male    | 65      |
| Europe / Italy / Abruzzo         | Human | Male    | 24      |
| Europe / Italy / Abruzzo         | Human | Female  | 40      |
| Europe / Italy / Abruzzo         | Human | Male    | 75      |
| Europe / Italy / Abruzzo         | Human | Male    | 62      |
| Europe / Italy / Abruzzo         | Human | Female  | 79      |
| Europe / Italy / Abruzzo         | Human | Male    | 81      |
| Europe / Italy / Abruzzo         | Human | Male    | 65      |
| Europe / Italy / Abruzzo         | Human | Male    | 70      |
| Europe / Italy / Abruzzo         | Human | Female  | 60      |
| Europe / Italy / Abruzzo         | Human | Female  | 84      |
| Europe / Italy / Abruzzo         | Human | Female  | 56      |
| Europe / Italy / Abruzzo         | Human | Male    | 49      |
| Europe / Italy / Abruzzo         | Human | Male    | 93      |
| Europe / Italy / Abruzzo         | Human | Female  | 89      |
| Europe / Italy / Abruzzo         | Human | Female  | 101     |
| Europe / Italy / Lazio           | Human | Male    | 67      |
| Europe / Italy / Lazio           | Human | Male    | 53      |
| Europe / Italy / Lazio           | Human | Female  | 49      |
| Europe / Italy / Lombardy        | Human | Male    | 75      |
| Europe / Italy / Lombardy        | Human | Male    | 75      |
| Europe / Italy / Lombardy        | Human | Male    | 54      |
| Europe / Italy / Lombardy        | Human | Male    | 54      |
| Europe / Italy / Apulia          | Human | Male    | 61      |
| Europe / Italy / Apulia          | Human | Male    | 56      |
| Europe / Italy / Veneto / Verona | Human | Female  | 46      |
| Europe / Italy / Veneto / Verona | Human | Female  | 31      |
| Europe / Italy / Veneto / Verona | Human | Male    | 39      |
| Europe / Italy / Veneto / Verona | Human | Female  | 57      |
| Europe / Italy / Veneto / Verona | Human | Male    | 47      |
| Europe / Italy / Veneto / Verona | Human | Female  | 62      |
| Europe / Italy / Veneto / Verona | Human | Male    | 96      |
| Europe / Italy / Veneto / Verona | Human | Female  | 98      |
| Europe / Italy / Veneto / Verona | Human | Female  | 29      |
| Europe / Italy / Veneto / Verona | Human | Male    | 34      |
| Europe / Italy / Veneto / Verona | Human | Male    | 50      |
| Europe / Italy / Tuscany / Siena | Human | unknown | unknown |

|                                      |       |         |         |
|--------------------------------------|-------|---------|---------|
| Europe / Italy / Emilia-Romagna      | Human | unknown | unknown |
| Europe / Italy / Trentino-Alto Adige | Human | unknown | unknown |
| Europe / Italy / Sicily              | Human | unknown | unknown |
| Europe / Italy / Valle D'Aosta       | Human | unknown | unknown |
| Europe / Italy / Molise              | Human | unknown | unknown |
| Europe / Italy / Valle D'Aosta       | Human | unknown | unknown |
| Europe / Italy / Basilicata          | Human | unknown | unknown |
| Europe / Italy / Abruzzo             | Human | unknown | unknown |
| Europe / Italy / Sardinia            | Human | unknown | unknown |
| Europe / Italy / Lombardy            | Human | Male    | unknown |
| Europe / Italy / Sardinia            | Human | Female  | 62      |
| Europe / Italy / Sardinia            | Human | Female  | 62      |
| Europe / Italy / Lombardy            | Human | Male    | 83      |
| Europe / Italy / Lombardy            | Human | Male    | 87      |
| Europe / Italy / Lombardy            | Human | Male    | 65      |
| Europe / Italy / Lombardy            | Human | Male    | 87      |
| Europe / Italy / Lombardy            | Human | Female  | 73      |
| Europe / Italy / Lombardy            | Human | Female  | 89      |
| Europe / Italy / Lombardy            | Human | Female  | 45      |
| Europe / Italy / Lombardy            | Human | Male    | 60      |
| Europe / Italy / Lombardy            | Human | Female  | 44      |
| Europe / Italy / Lombardy            | Human | Male    | 78      |
| Europe / Italy / Lombardy            | Human | Male    | 88      |
| Europe / Italy / Lombardy            | Human | Male    | 73      |
| Europe / Italy / Lombardy            | Human | Male    | 37      |
| Europe / Italy / Lombardy            | Human | Male    | 80      |
| Europe / Italy / Lombardy            | Human | Male    | 1       |
| Europe / Italy / Lombardy            | Human | Male    | 78      |
| Europe / Italy / Lombardy            | Human | Female  | 59      |
| Europe / Italy / Apulia / Taranto    | Human | Female  | 26      |
| Europe / Italy / Apulia              | Human | Male    | 72      |
| Europe / Italy / Apulia              | Human | Male    | 43      |
| Europe / Italy / Apulia / Taranto    | Human | Male    | 56      |
| Europe / Italy / Apulia / Taranto    | Human | Male    | 36      |
| Europe / Italy / Apulia / Lecce      | Human | Male    | 47      |
| Europe / Italy / Apulia / Lecce      | Human | Male    | 45      |
| Europe / Italy / Apulia / Brindisi   | Human | Female  | 47      |
| Europe / Italy / Apulia              | Human | Female  | 62      |
| Europe / Italy / Apulia              | Human | Male    | 67      |
| Europe / Italy / Basilicata          | Human | Female  | 44      |
| Europe / Italy / Basilicata          | Human | Male    | 18      |
| Europe / Italy / Basilicata          | Human | Female  | 62      |
| Europe / Italy / Basilicata          | Human | Male    | 56      |
| Europe / Italy / Basilicata          | Human | Male    | 57      |
| Europe / Italy / Basilicata          | Human | Male    | 12      |

|                                        |       |         |         |
|----------------------------------------|-------|---------|---------|
| Europe / Italy / Basilicata            | Human | Male    | 56      |
| Europe / Italy / Apulia                | Human | Male    | 88      |
| Europe / Italy / Apulia                | Human | Male    | 63      |
| Europe / Italy / Campania / Naples     | Human | Female  | 88      |
| Europe / Italy / Friuli Venezia Giulia | Human | Male    | 47      |
| Europe / Italy / Friuli Venezia Giulia | Human | Male    | 47      |
| Europe / Italy / Friuli Venezia Giulia | Human | Male    | 59      |
| Europe / Italy / Friuli Venezia Giulia | Human | Male    | 59      |
| Europe / Italy / Friuli Venezia Giulia | Human | Male    | 67      |
| Europe / Italy / Friuli Venezia Giulia | Human | Male    | 71      |
| Europe / Italy / Lombardy              | Human | unknown | unknown |
| Europe / Italy / Lombardy              | Human | unknown | unknown |
| Europe / Italy / Lombardy              | Human | unknown | unknown |
| Europe / Italy / Lombardy              | Human | unknown | unknown |
| Europe / Italy / Lombardy              | Human | unknown | unknown |
| Europe / Italy / Lombardy              | Human | unknown | unknown |
| Europe / Italy / Lombardy              | Human | unknown | unknown |
| Europe / Italy / Lombardy              | Human | unknown | unknown |
| Europe / Italy / Lombardy              | Human | unknown | unknown |
| Europe / Italy / Lombardy              | Human | unknown | unknown |
| Europe / Italy / Lombardy              | Human | unknown | unknown |
| Europe / Italy / Lombardy              | Human | unknown | unknown |
| Europe / Italy / Lombardy              | Human | unknown | unknown |
| Europe / Italy / Lombardy              | Human | unknown | unknown |
| Europe / Italy / Lombardy              | Human | unknown | unknown |
| Europe / Italy / Campania              | Human | Male    | 47      |
| Europe / Italy / Veneto / Verona       | Human | Male    | unknown |
| Europe / Italy / Veneto / Verona       | Human | Female  | 77      |
| Europe / Italy / Veneto / Verona       | Human | Male    | 61      |
| Europe / Italy / Veneto / Verona       | Human | Male    | 82      |
| Europe / Italy / Veneto / Verona       | Human | Male    | 59      |
| Europe / Italy / Veneto / Verona       | Human | Male    | 52      |
| Europe / Italy / Veneto / Verona       | Human | Male    | 67      |
| Europe / Italy / Veneto / Verona       | Human | Female  | 48      |
| Europe / Italy / Lazio                 | Human | Female  | 64      |
| Europe / Italy / Lazio                 | Human | Female  | 24      |
| Europe / Italy / Lazio                 | Human | Female  | 85      |
| Europe / Italy / Lazio                 | Human | unknown | 68      |
| Europe / Italy / Campania / Benevento  | Human | Male    | 65      |
| Europe / Italy / Campania / Benevento  | Human | Male    | 64      |
| Europe / Italy / Campania              | Human | Female  | 84      |
| Europe / Italy / Campania              | Human | Male    | 71      |
| Europe / Italy / Campania              | Human | Female  | 60      |
| Europe / Italy / Campania              | Human | Male    | 78      |
| Europe / Italy / Veneto / Verona       | Human | unknown | unknown |
| Europe / Italy / Friuli Venezia Giulia | Human | Male    | 67      |

|                                        |       |         |         |
|----------------------------------------|-------|---------|---------|
| Europe / Italy / Friuli Venezia Giulia | Human | Female  | 50      |
| Europe / Italy / Friuli Venezia Giulia | Human | Male    | 17      |
| Europe / Italy / Friuli Venezia Giulia | Human | Male    | 54      |
| Europe / Italy / Friuli Venezia Giulia | Human | Female  | 31      |
| Europe / Italy / Friuli Venezia Giulia | Human | Female  | 27      |
| Europe / Italy / Campania / Benevento  | Human | Male    | 65      |
| Europe / Italy / Campania / Benevento  | Human | unknown | unknown |
| Europe / Italy / Marche / Ancona       | Human | Female  | 31      |
| Europe / Italy / Marche / Ancona       | Human | Female  | 65      |
| Europe / Italy / Marche / Ancona       | Human | Female  | 57      |
| Europe / Italy / Marche / Ancona       | Human | Female  | 63      |
| Europe / Italy / Marche / Ancona       | Human | Male    | 80      |
| Europe / Italy / Marche / Ancona       | Human | Female  | 47      |
| Europe / Italy / Marche / Ancona       | Human | Female  | 52      |
| Europe / Italy / Marche / Ancona       | Human | Male    | 52      |
| Europe / Italy / Marche / Ancona       | Human | Male    | 44      |
| Europe / Italy / Marche / Ancona       | Human | Male    | 44      |
| Europe / Italy / Veneto / Verona       | Human | Female  | 80      |
| Europe / Italy / Veneto / Verona       | Human | Male    | 43      |
| Europe / Italy / Veneto / Verona       | Human | Female  | 49      |
| Europe / Italy / Veneto / Verona       | Human | Female  | 59      |
| Europe / Italy / Veneto / Verona       | Human | Male    | 61      |
| Europe / Italy / Veneto / Verona       | Human | Male    | 84      |
| Europe / Italy / Veneto / Verona       | Human | Male    | 23      |
| Europe / Italy / Veneto / Verona       | Human | Male    | 22      |
| Europe / Italy / Veneto / Verona       | Human | Male    | 28      |
| Europe / Italy / Veneto / Verona       | Human | Male    | 34      |
| Europe / Italy / Veneto / Verona       | Human | Female  | 82      |
| Europe / Italy / Veneto / Verona       | Human | Female  | 89      |
| Europe / Italy / Veneto / Verona       | Human | Female  | 60      |
| Europe / Italy / Veneto / Verona       | Human | Female  | 92      |
| Europe / Italy / Friuli Venezia Giulia | Human | Female  | unknown |
| Europe / Italy / Friuli Venezia Giulia | Human | Male    | unknown |
| Europe / Italy / Apulia / Bari         | Human | Male    | 65      |
| Europe / Italy / Apulia / Lecce        | Human | Male    | 52      |
| Europe / Italy / Apulia / Lecce        | Human | Male    | 52      |
| Europe / Italy / Apulia / Brindisi     | Human | Female  | 87      |
| Europe / Italy / Apulia / Brindisi     | Human | Female  | 73      |
| Europe / Italy / Apulia / Brindisi     | Human | Female  | 60      |
| Europe / Italy / Apulia / Brindisi     | Human | Female  | 57      |
| Europe / Italy / Apulia / Brindisi     | Human | Female  | 86      |
| Europe / Italy / Apulia / Brindisi     | Human | Female  | 87      |
| Europe / Italy / Apulia / Brindisi     | Human | Male    | 93      |
| Europe / Italy / Apulia / Brindisi     | Human | Female  | 99      |
| Europe / Italy / Apulia / Brindisi     | Human | Female  | 84      |

|                                       |       |        |     |
|---------------------------------------|-------|--------|-----|
| Europe / Italy / Apulia / Brindisi    | Human | Male   | 80  |
| Europe / Italy / Apulia / Brindisi    | Human | Female | 94  |
| Europe / Italy / Apulia / Brindisi    | Human | Male   | 95  |
| Europe / Italy / Apulia / Brindisi    | Human | Female | 90  |
| Europe / Italy / Apulia / Brindisi    | Human | Female | 95  |
| Europe / Italy / Apulia / Brindisi    | Human | Male   | 72  |
| Europe / Italy / Apulia / Lecce       | Human | Female | 86  |
| Europe / Italy / Apulia / Lecce       | Human | Female | 86  |
| Europe / Italy / Basilicata / Potenza | Human | Female | 52  |
| Europe / Italy / Basilicata / Potenza | Human | Female | 72  |
| Europe / Italy / Apulia / Brindisi    | Human | Male   | 48  |
| Europe / Italy / Abruzzo              | Human | Male   | 89  |
| Europe / Italy / Abruzzo              | Human | Male   | 43  |
| Europe / Italy / Abruzzo              | Human | Female | 30  |
| Europe / Italy / Abruzzo              | Human | Female | 72  |
| Europe / Italy / Abruzzo              | Human | Male   | 45  |
| Europe / Italy / Abruzzo              | Human | Male   | 35  |
| Europe / Italy / Abruzzo              | Human | Female | 49  |
| Europe / Italy / Abruzzo              | Human | Male   | 83  |
| Europe / Italy / Abruzzo              | Human | Female | 38  |
| Europe / Italy / Abruzzo              | Human | Male   | 67  |
| Europe / Italy / Lombardy             | Human | Female | 45  |
| Europe / Italy / Lombardy             | Human | Female | 58  |
| Europe / Italy / Lombardy             | Human | Female | 91  |
| Europe / Italy / Lombardy             | Human | Female | 86  |
| Europe / Italy / Lombardy             | Human | Female | 60  |
| Europe / Italy / Lombardy             | Human | Female | 63  |
| Europe / Italy / Lombardy             | Human | Male   | 48  |
| Europe / Italy / Lombardy             | Human | Female | 59  |
| Europe / Italy / Lombardy             | Human | Female | 38  |
| Europe / Italy / Lombardy             | Human | Female | 90  |
| Europe / Italy / Lombardy             | Human | Female | 55  |
| Europe / Italy / Lombardy             | Human | Female | 78  |
| Europe / Italy / Lombardy             | Human | Female | 94  |
| Europe / Italy / Lombardy             | Human | Female | 82  |
| Europe / Italy / Lombardy             | Human | Female | 92  |
| Europe / Italy / Lombardy             | Human | Female | 100 |
| Europe / Italy / Abruzzo              | Human | Male   | 90  |
| Europe / Italy / Abruzzo              | Human | Male   | 52  |
| Europe / Italy / Abruzzo              | Human | Female | 81  |
| Europe / Italy / Abruzzo              | Human | Female | 61  |
| Europe / Italy / Abruzzo              | Human | Female | 40  |
| Europe / Italy / Abruzzo              | Human | Male   | 4   |
| Europe / Italy / Abruzzo              | Human | Female | 2   |
| Europe / Italy / Abruzzo              | Human | Female | 8   |

|                           |       |        |          |
|---------------------------|-------|--------|----------|
| Europe / Italy / Abruzzo  | Human | Female | 27       |
| Europe / Italy / Abruzzo  | Human | Female | 47       |
| Europe / Italy / Abruzzo  | Human | Female | 24       |
| Europe / Italy / Abruzzo  | Human | Female | 17       |
| Europe / Italy / Abruzzo  | Human | Male   | 77       |
| Europe / Italy / Abruzzo  | Human | Female | 73       |
| Europe / Italy / Abruzzo  | Human | Male   | 68       |
| Europe / Italy / Abruzzo  | Human | Female | 68       |
| Europe / Italy / Abruzzo  | Human | Female | 85       |
| Europe / Italy / Abruzzo  | Human | Female | 39       |
| Europe / Italy / Abruzzo  | Human | Male   | 38       |
| Europe / Italy / Abruzzo  | Human | Male   | 39       |
| Europe / Italy / Abruzzo  | Human | Male   | 44       |
| Europe / Italy / Abruzzo  | Human | Male   | 3 months |
| Europe / Italy / Abruzzo  | Human | Female | 36       |
| Europe / Italy / Abruzzo  | Human | Female | 54       |
| Europe / Italy / Abruzzo  | Human | Male   | 69       |
| Europe / Italy / Abruzzo  | Human | Female | 84       |
| Europe / Italy / Abruzzo  | Human | Female | 78       |
| Europe / Italy / Abruzzo  | Human | Female | 81       |
| Europe / Italy / Abruzzo  | Human | Female | 2        |
| Europe / Italy / Abruzzo  | Human | Female | 74       |
| Europe / Italy / Lombardy | Human | Female | 45       |
| Europe / Italy / Lombardy | Human | Male   | 59       |
| Europe / Italy / Lombardy | Human | Male   | 52       |
| Europe / Italy / Lombardy | Human | Male   | 64       |
| Europe / Italy / Lombardy | Human | Female | 45       |
| Europe / Italy / Lombardy | Human | Male   | 66       |
| Europe / Italy / Lombardy | Human | Male   | 90       |
| Europe / Italy / Lombardy | Human | Female | 25       |
| Europe / Italy / Lombardy | Human | Female | 72       |
| Europe / Italy / Lombardy | Human | Male   | 59       |
| Europe / Italy / Lombardy | Human | Male   | 74       |
| Europe / Italy / Lombardy | Human | Male   | 74       |
| Europe / Italy / Lombardy | Human | Female | 37       |
| Europe / Italy / Lombardy | Human | Male   | 58       |
| Europe / Italy / Lombardy | Human | Male   | 64       |
| Europe / Italy / Lombardy | Human | Female | 58       |
| Europe / Italy / Lombardy | Human | Male   | 86       |
| Europe / Italy / Lombardy | Human | Female | 36       |
| Europe / Italy / Lombardy | Human | Male   | 68       |
| Europe / Italy / Lombardy | Human | Male   | 84       |
| Europe / Italy / Lombardy | Human | Male   | 68       |
| Europe / Italy / Lombardy | Human | Male   | 54       |
| Europe / Italy / Lombardy | Human | Female | 86       |

|                           |       |        |     |
|---------------------------|-------|--------|-----|
| Europe / Italy / Lombardy | Human | Male   | 43  |
| Europe / Italy / Lombardy | Human | Female | 43  |
| Europe / Italy / Lombardy | Human | Female | 73  |
| Europe / Italy / Lombardy | Human | Female | 82  |
| Europe / Italy / Lombardy | Human | Male   | 67  |
| Europe / Italy / Lombardy | Human | Female | 85  |
| Europe / Italy / Lombardy | Human | Female | 47  |
| Europe / Italy / Lombardy | Human | Female | 96  |
| Europe / Italy / Lombardy | Human | Male   | 86  |
| Europe / Italy / Lombardy | Human | Male   | 68  |
| Europe / Italy / Lombardy | Human | Female | 83  |
| Europe / Italy / Lombardy | Human | Female | 90  |
| Europe / Italy / Lombardy | Human | Female | 86  |
| Europe / Italy / Lombardy | Human | Male   | 62  |
| Europe / Italy / Lombardy | Human | Female | 66  |
| Europe / Italy / Lombardy | Human | Male   | 83  |
| Europe / Italy / Lombardy | Human | Male   | 75  |
| Europe / Italy / Lombardy | Human | Female | 50  |
| Europe / Italy / Lombardy | Human | Female | 51  |
| Europe / Italy / Lombardy | Human | Female | 64  |
| Europe / Italy / Lombardy | Human | Female | 35  |
| Europe / Italy / Lombardy | Human | Female | 56  |
| Europe / Italy / Lombardy | Human | Male   | 89  |
| Europe / Italy / Lombardy | Human | Male   | 62  |
| Europe / Italy / Lombardy | Human | Male   | 74  |
| Europe / Italy / Lombardy | Human | Female | 74  |
| Europe / Italy / Lombardy | Human | Female | 48  |
| Europe / Italy / Lombardy | Human | Female | 81  |
| Europe / Italy / Lombardy | Human | Female | 85  |
| Europe / Italy / Lombardy | Human | Female | 95  |
| Europe / Italy / Lombardy | Human | Female | 100 |
| Europe / Italy / Lombardy | Human | Female | 53  |
| Europe / Italy / Lombardy | Human | Female | 89  |
| Europe / Italy / Lombardy | Human | Male   | 78  |
| Europe / Italy / Lombardy | Human | Male   | 31  |
| Europe / Italy / Lombardy | Human | Male   | 72  |
| Europe / Italy / Lombardy | Human | Female | 52  |
| Europe / Italy / Lombardy | Human | Male   | 48  |
| Europe / Italy / Lombardy | Human | Female | 77  |
| Europe / Italy / Lombardy | Human | Male   | 87  |
| Europe / Italy / Lombardy | Human | Male   | 95  |
| Europe / Italy / Lombardy | Human | Female | 55  |
| Europe / Italy / Lombardy | Human | Male   | 44  |
| Europe / Italy / Lombardy | Human | Female | 85  |
| Europe / Italy / Lombardy | Human | Female | 80  |



|                           |       |        |    |
|---------------------------|-------|--------|----|
| Europe / Italy / Lombardy | Human | Female | 63 |
| Europe / Italy / Lombardy | Human | Female | 95 |
| Europe / Italy / Lombardy | Human | Male   | 92 |
| Europe / Italy / Lombardy | Human | Female | 47 |
| Europe / Italy / Lombardy | Human | Female | 96 |
| Europe / Italy / Lombardy | Human | Male   | 49 |
| Europe / Italy / Lombardy | Human | Female | 89 |
| Europe / Italy / Lombardy | Human | Female | 45 |
| Europe / Italy / Lombardy | Human | Female | 49 |
| Europe / Italy / Lombardy | Human | Male   | 88 |
| Europe / Italy / Lombardy | Human | Female | 93 |
| Europe / Italy / Lombardy | Human | Male   | 84 |
| Europe / Italy / Lombardy | Human | Female | 79 |
| Europe / Italy / Lombardy | Human | Male   | 44 |
| Europe / Italy / Lombardy | Human | Female | 89 |
| Europe / Italy / Lombardy | Human | Male   | 91 |
| Europe / Italy / Lombardy | Human | Female | 82 |
| Europe / Italy / Lombardy | Human | Female | 92 |
| Europe / Italy / Lombardy | Human | Male   | 89 |
| Europe / Italy / Lombardy | Human | Female | 88 |
| Europe / Italy / Lombardy | Human | Female | 37 |
| Europe / Italy / Lombardy | Human | Male   | 53 |
| Europe / Italy / Lombardy | Human | Female | 70 |
| Europe / Italy / Lombardy | Human | Female | 91 |
| Europe / Italy / Lombardy | Human | Female | 91 |
| Europe / Italy / Lombardy | Human | Female | 82 |
| Europe / Italy / Lombardy | Human | Male   | 19 |
| Europe / Italy / Lombardy | Human | Male   | 78 |
| Europe / Italy / Lombardy | Human | Male   | 65 |
| Europe / Italy / Lombardy | Human | Female | 85 |
| Europe / Italy / Lombardy | Human | Female | 57 |
| Europe / Italy / Lombardy | Human | Male   | 66 |
| Europe / Italy / Lombardy | Human | Male   | 60 |
| Europe / Italy / Lombardy | Human | Female | 88 |
| Europe / Italy / Lombardy | Human | Male   | 72 |
| Europe / Italy / Lombardy | Human | Male   | 85 |
| Europe / Italy / Lombardy | Human | Male   | 60 |
| Europe / Italy / Lombardy | Human | Male   | 20 |
| Europe / Italy / Lombardy | Human | Male   | 27 |
| Europe / Italy / Lombardy | Human | Male   | 83 |
| Europe / Italy / Lombardy | Human | Male   | 38 |
| Europe / Italy / Lombardy | Human | Female | 21 |
| Europe / Italy / Lombardy | Human | Female | 58 |
| Europe / Italy / Lombardy | Human | Male   | 22 |
| Europe / Italy / Lombardy | Human | Male   | 86 |

|                           |       |        |    |
|---------------------------|-------|--------|----|
| Europe / Italy / Lombardy | Human | Male   | 68 |
| Europe / Italy / Lombardy | Human | Female | 53 |
| Europe / Italy / Lombardy | Human | Female | 82 |
| Europe / Italy / Lombardy | Human | Male   | 87 |
| Europe / Italy / Lombardy | Human | Male   | 92 |
| Europe / Italy / Lombardy | Human | Male   | 59 |
| Europe / Italy / Lombardy | Human | Male   | 55 |
| Europe / Italy / Lombardy | Human | Male   | 51 |
| Europe / Italy / Lombardy | Human | Male   | 69 |
| Europe / Italy / Lombardy | Human | Female | 41 |
| Europe / Italy / Lombardy | Human | Female | 19 |
| Europe / Italy / Lombardy | Human | Female | 68 |
| Europe / Italy / Lombardy | Human | Female | 76 |
| Europe / Italy / Lombardy | Human | Female | 66 |
| Europe / Italy / Lombardy | Human | Female | 76 |
| Europe / Italy / Lombardy | Human | Male   | 72 |
| Europe / Italy / Lombardy | Human | Female | 59 |
| Europe / Italy / Lombardy | Human | Male   | 38 |
| Europe / Italy / Lombardy | Human | Male   | 79 |
| Europe / Italy / Lombardy | Human | Male   | 34 |
| Europe / Italy / Lombardy | Human | Female | 80 |
| Europe / Italy / Lombardy | Human | Male   | 62 |
| Europe / Italy / Lombardy | Human | Female | 78 |
| Europe / Italy / Lombardy | Human | Male   | 79 |
| Europe / Italy / Lombardy | Human | Male   | 78 |
| Europe / Italy / Lombardy | Human | Male   | 84 |
| Europe / Italy / Lombardy | Human | Male   | 89 |
| Europe / Italy / Lombardy | Human | Male   | 85 |
| Europe / Italy / Lombardy | Human | Female | 69 |
| Europe / Italy / Lombardy | Human | Male   | 96 |
| Europe / Italy / Lombardy | Human | Male   | 73 |
| Europe / Italy / Lombardy | Human | Female | 53 |
| Europe / Italy / Lombardy | Human | Male   | 88 |
| Europe / Italy / Lombardy | Human | Male   | 86 |
| Europe / Italy / Lombardy | Human | Male   | 87 |
| Europe / Italy / Lombardy | Human | Male   | 36 |
| Europe / Italy / Lombardy | Human | Male   | 87 |
| Europe / Italy / Lombardy | Human | Male   | 67 |
| Europe / Italy / Lombardy | Human | Male   | 85 |
| Europe / Italy / Lombardy | Human | Male   | 67 |
| Europe / Italy / Lombardy | Human | Male   | 57 |
| Europe / Italy / Lombardy | Human | Female | 82 |
| Europe / Italy / Lombardy | Human | Female | 47 |
| Europe / Italy / Lombardy | Human | Female | 54 |
| Europe / Italy / Lombardy | Human | Male   | 81 |

|                           |       |        |    |
|---------------------------|-------|--------|----|
| Europe / Italy / Lombardy | Human | Female | 85 |
| Europe / Italy / Lombardy | Human | Male   | 78 |
| Europe / Italy / Lombardy | Human | Female | 80 |
| Europe / Italy / Lombardy | Human | Female | 90 |
| Europe / Italy / Lombardy | Human | Male   | 56 |
| Europe / Italy / Lombardy | Human | Female | 92 |
| Europe / Italy / Lombardy | Human | Male   | 82 |
| Europe / Italy / Lombardy | Human | Female | 46 |
| Europe / Italy / Lombardy | Human | Female | 52 |
| Europe / Italy / Lombardy | Human | Male   | 83 |
| Europe / Italy / Lombardy | Human | Male   | 81 |
| Europe / Italy / Lombardy | Human | Male   | 54 |
| Europe / Italy / Lombardy | Human | Male   | 76 |
| Europe / Italy / Lombardy | Human | Male   | 80 |
| Europe / Italy / Lombardy | Human | Female | 47 |
| Europe / Italy / Lombardy | Human | Male   | 70 |
| Europe / Italy / Lombardy | Human | Female | 66 |
| Europe / Italy / Lombardy | Human | Male   | 77 |
| Europe / Italy / Lombardy | Human | Female | 66 |
| Europe / Italy / Lombardy | Human | Male   | 64 |
| Europe / Italy / Lombardy | Human | Female | 75 |
| Europe / Italy / Lombardy | Human | Female | 88 |
| Europe / Italy / Lombardy | Human | Female | 19 |
| Europe / Italy / Lombardy | Human | Male   | 80 |
| Europe / Italy / Lombardy | Human | Male   | 91 |
| Europe / Italy / Lombardy | Human | Male   | 60 |
| Europe / Italy / Lombardy | Human | Male   | 76 |
| Europe / Italy / Lombardy | Human | Male   | 82 |
| Europe / Italy / Lombardy | Human | Male   | 85 |
| Europe / Italy / Lombardy | Human | Female | 81 |
| Europe / Italy / Lombardy | Human | Male   | 84 |
| Europe / Italy / Lombardy | Human | Female | 81 |
| Europe / Italy / Lombardy | Human | Female | 97 |
| Europe / Italy / Lombardy | Human | Male   | 89 |
| Europe / Italy / Lombardy | Human | Male   | 94 |
| Europe / Italy / Lombardy | Human | Female | 84 |
| Europe / Italy / Lombardy | Human | Male   | 79 |
| Europe / Italy / Lombardy | Human | Male   | 59 |
| Europe / Italy / Lombardy | Human | Male   | 30 |
| Europe / Italy / Lombardy | Human | Female | 68 |
| Europe / Italy / Lombardy | Human | Male   | 52 |
| Europe / Italy / Lombardy | Human | Male   | 98 |
| Europe / Italy / Lombardy | Human | Male   | 49 |
| Europe / Italy / Lombardy | Human | Female | 44 |
| Europe / Italy / Lombardy | Human | Male   | 75 |

|                           |       |        |    |
|---------------------------|-------|--------|----|
| Europe / Italy / Lombardy | Human | Female | 68 |
| Europe / Italy / Lombardy | Human | Male   | 66 |
| Europe / Italy / Lombardy | Human | Male   | 70 |
| Europe / Italy / Lombardy | Human | Male   | 61 |
| Europe / Italy / Lombardy | Human | Male   | 36 |
| Europe / Italy / Lombardy | Human | Male   | 82 |
| Europe / Italy / Lombardy | Human | Male   | 78 |
| Europe / Italy / Lombardy | Human | Male   | 51 |
| Europe / Italy / Lombardy | Human | Male   | 55 |
| Europe / Italy / Lombardy | Human | Male   | 75 |
| Europe / Italy / Lombardy | Human | Male   | 36 |
| Europe / Italy / Lombardy | Human | Male   | 37 |
| Europe / Italy / Lombardy | Human | Female | 71 |
| Europe / Italy / Lombardy | Human | Female | 85 |
| Europe / Italy / Lombardy | Human | Male   | 75 |
| Europe / Italy / Lombardy | Human | Female | 95 |
| Europe / Italy / Lombardy | Human | Female | 80 |
| Europe / Italy / Lombardy | Human | Male   | 72 |
| Europe / Italy / Lombardy | Human | Male   | 24 |
| Europe / Italy / Lombardy | Human | Male   | 93 |
| Europe / Italy / Lombardy | Human | Male   | 62 |
| Europe / Italy / Lombardy | Human | Male   | 68 |
| Europe / Italy / Lombardy | Human | Female | 81 |
| Europe / Italy / Lombardy | Human | Male   | 60 |
| Europe / Italy / Lombardy | Human | Male   | 45 |
| Europe / Italy / Lombardy | Human | Male   | 55 |
| Europe / Italy / Lombardy | Human | Female | 98 |
| Europe / Italy / Lombardy | Human | Female | 43 |
| Europe / Italy / Lombardy | Human | Male   | 89 |
| Europe / Italy / Lombardy | Human | Female | 78 |
| Europe / Italy / Lombardy | Human | Male   | 70 |
| Europe / Italy / Lombardy | Human | Female | 91 |
| Europe / Italy / Lombardy | Human | Male   | 90 |
| Europe / Italy / Lombardy | Human | Male   | 40 |
| Europe / Italy / Lombardy | Human | Female | 74 |
| Europe / Italy / Lombardy | Human | Male   | 34 |
| Europe / Italy / Lombardy | Human | Female | 84 |
| Europe / Italy / Lombardy | Human | Male   | 68 |
| Europe / Italy / Lombardy | Human | Male   | 81 |
| Europe / Italy / Lombardy | Human | Male   | 49 |
| Europe / Italy / Lombardy | Human | Male   | 82 |
| Europe / Italy / Lombardy | Human | Female | 86 |
| Europe / Italy / Lombardy | Human | Male   | 86 |
| Europe / Italy / Lombardy | Human | Female | 82 |
| Europe / Italy / Lombardy | Human | Male   | 46 |

|                           |       |        |    |
|---------------------------|-------|--------|----|
| Europe / Italy / Lombardy | Human | Female | 66 |
| Europe / Italy / Lombardy | Human | Male   | 31 |
| Europe / Italy / Lombardy | Human | Male   | 79 |
| Europe / Italy / Lombardy | Human | Female | 49 |
| Europe / Italy / Lombardy | Human | Female | 86 |
| Europe / Italy / Lombardy | Human | Female | 80 |
| Europe / Italy / Lombardy | Human | Male   | 89 |
| Europe / Italy / Lombardy | Human | Female | 54 |
| Europe / Italy / Lombardy | Human | Male   | 77 |
| Europe / Italy / Lombardy | Human | Female | 74 |
| Europe / Italy / Lombardy | Human | Male   | 79 |
| Europe / Italy / Lombardy | Human | Female | 84 |
| Europe / Italy / Lombardy | Human | Female | 90 |
| Europe / Italy / Lombardy | Human | Female | 57 |
| Europe / Italy / Lombardy | Human | Female | 84 |
| Europe / Italy / Lombardy | Human | Male   | 91 |
| Europe / Italy / Lombardy | Human | Female | 75 |
| Europe / Italy / Lombardy | Human | Female | 25 |
| Europe / Italy / Lombardy | Human | Female | 93 |
| Europe / Italy / Lombardy | Human | Female | 80 |
| Europe / Italy / Lombardy | Human | Male   | 46 |
| Europe / Italy / Lombardy | Human | Male   | 71 |
| Europe / Italy / Lombardy | Human | Female | 59 |
| Europe / Italy / Lombardy | Human | Male   | 73 |
| Europe / Italy / Lombardy | Human | Female | 51 |
| Europe / Italy / Lombardy | Human | Male   | 99 |
| Europe / Italy / Lombardy | Human | Female | 84 |
| Europe / Italy / Lombardy | Human | Female | 84 |
| Europe / Italy / Lombardy | Human | Male   | 28 |
| Europe / Italy / Lombardy | Human | Female | 83 |
| Europe / Italy / Lombardy | Human | Female | 87 |
| Europe / Italy / Lombardy | Human | Male   | 47 |
| Europe / Italy / Lombardy | Human | Male   | 77 |
| Europe / Italy / Lombardy | Human | Female | 76 |
| Europe / Italy / Lombardy | Human | Female | 71 |
| Europe / Italy / Lombardy | Human | Female | 89 |
| Europe / Italy / Lombardy | Human | Male   | 73 |
| Europe / Italy / Lombardy | Human | Female | 85 |
| Europe / Italy / Lombardy | Human | Male   | 85 |
| Europe / Italy / Lombardy | Human | Male   | 49 |
| Europe / Italy / Lombardy | Human | Male   | 67 |
| Europe / Italy / Lombardy | Human | Male   | 64 |
| Europe / Italy / Lombardy | Human | Male   | 79 |
| Europe / Italy / Lombardy | Human | Female | 56 |
| Europe / Italy / Lombardy | Human | Male   | 42 |

|                           |       |        |    |
|---------------------------|-------|--------|----|
| Europe / Italy / Lombardy | Human | Male   | 87 |
| Europe / Italy / Lombardy | Human | Female | 55 |
| Europe / Italy / Lombardy | Human | Female | 50 |
| Europe / Italy / Lombardy | Human | Female | 60 |
| Europe / Italy / Lombardy | Human | Female | 70 |
| Europe / Italy / Lombardy | Human | Female | 51 |
| Europe / Italy / Lombardy | Human | Female | 61 |
| Europe / Italy / Lombardy | Human | Female | 56 |
| Europe / Italy / Lombardy | Human | Male   | 77 |
| Europe / Italy / Lombardy | Human | Male   | 45 |
| Europe / Italy / Lombardy | Human | Male   | 77 |
| Europe / Italy / Lombardy | Human | Female | 78 |
| Europe / Italy / Lombardy | Human | Female | 51 |
| Europe / Italy / Lombardy | Human | Male   | 65 |
| Europe / Italy / Lombardy | Human | Male   | 79 |
| Europe / Italy / Lombardy | Human | Male   | 89 |
| Europe / Italy / Lombardy | Human | Male   | 47 |
| Europe / Italy / Lombardy | Human | Female | 48 |
| Europe / Italy / Lombardy | Human | Male   | 68 |
| Europe / Italy / Lombardy | Human | Male   | 90 |
| Europe / Italy / Lombardy | Human | Male   | 62 |
| Europe / Italy / Lombardy | Human | Male   | 23 |
| Europe / Italy / Lombardy | Human | Female | 96 |
| Europe / Italy / Lombardy | Human | Female | 72 |
| Europe / Italy / Lombardy | Human | Male   | 52 |
| Europe / Italy / Lombardy | Human | Male   | 54 |
| Europe / Italy / Lombardy | Human | Male   | 57 |
| Europe / Italy / Lombardy | Human | Female | 88 |
| Europe / Italy / Lombardy | Human | Male   | 76 |
| Europe / Italy / Lombardy | Human | Female | 41 |
| Europe / Italy / Lombardy | Human | Female | 73 |
| Europe / Italy / Lombardy | Human | Male   | 41 |
| Europe / Italy / Lombardy | Human | Male   | 57 |
| Europe / Italy / Lombardy | Human | Male   | 70 |
| Europe / Italy / Lombardy | Human | Female | 49 |
| Europe / Italy / Lombardy | Human | Male   | 49 |
| Europe / Italy / Lombardy | Human | Male   | 73 |
| Europe / Italy / Lombardy | Human | Male   | 64 |
| Europe / Italy / Lombardy | Human | Male   | 81 |
| Europe / Italy / Lombardy | Human | Male   | 35 |
| Europe / Italy / Lombardy | Human | Male   | 54 |
| Europe / Italy / Lombardy | Human | Male   | 81 |
| Europe / Italy / Lombardy | Human | Female | 77 |
| Europe / Italy / Lombardy | Human | Male   | 73 |
| Europe / Italy / Lombardy | Human | Male   | 80 |

|                                       |       |         |          |
|---------------------------------------|-------|---------|----------|
| Europe / Italy / Lombardy             | Human | Female  | 31       |
| Europe / Italy / Lombardy             | Human | Male    | 57       |
| Europe / Italy / Lombardy             | Human | Male    | 59       |
| Europe / Italy / Lombardy             | Human | Male    | 79       |
| Europe / Italy / Lombardy             | Human | Male    | 65       |
| Europe / Italy / Lombardy             | Human | Female  | 90       |
| Europe / Italy / Lombardy             | Human | Male    | 80       |
| Europe / Italy / Campania / Benevento | Human | Male    | 3        |
| Europe / Italy / Lombardy / Pavia     | Human | Male    | 74       |
| Europe / Italy / Piedmont / Turin     | Human | Female  | 56       |
| Europe / Italy / Piedmont / Turin     | Human | Female  | 83       |
| Europe / Italy / Piedmont / Turin     | Human | Male    | 41       |
| Europe / Italy / Piedmont / Turin     | Human | Male    | 5 months |
| Europe / Italy / Piedmont / Turin     | Human | Male    | 23       |
| Europe / Italy / Piedmont / Turin     | Human | Female  | 59       |
| Europe / Italy / Piedmont / Turin     | Human | Male    | 45       |
| Europe / Italy / Piedmont / Turin     | Human | Female  | 76       |
| Europe / Italy / Piedmont / Turin     | Human | Female  | 49       |
| Europe / Italy / Piedmont / Turin     | Human | Male    | 35       |
| Europe / Italy / Piedmont / Turin     | Human | Male    | 59       |
| Europe / Italy / Piedmont / Turin     | Human | Female  | 60       |
| Europe / Italy / Piedmont / Turin     | Human | Female  | 83       |
| Europe / Italy / Piedmont / Turin     | Human | Male    | 21       |
| Europe / Italy / Piedmont / Turin     | Human | Female  | 44       |
| Europe / Italy / Piedmont / Turin     | Human | Female  | 81       |
| Europe / Italy / Piedmont / Turin     | Human | Female  | 63       |
| Europe / Italy / Piedmont / Turin     | Human | Female  | 78       |
| Europe / Italy / Piedmont / Turin     | Human | Male    | 76       |
| Europe / Italy / Piedmont / Turin     | Human | Male    | 44       |
| Europe / Italy / Piedmont / Turin     | Human | Male    | 96       |
| Europe / Italy / Piedmont / Turin     | Human | Female  | 80       |
| Europe / Italy / Campania             | Human | Female  | 53       |
| Europe / Italy / Campania             | Human | Male    | 81       |
| Europe / Italy / Campania             | Human | Female  | 28       |
| Europe / Italy / Campania             | Human | Male    | 82       |
| Europe / Italy / Campania             | Human | Male    | 64       |
| Europe / Italy / Tuscany              | Human | unknown | unknown  |
| Europe / Italy / Sicily / Palermo     | Human | Female  | 26       |
| Europe / Italy / Sicily / Palermo     | Human | Male    | 17       |
| Europe / Italy / Sicily / Palermo     | Human | Male    | 18       |
| Europe / Italy / Sicily / Palermo     | Human | Male    | 17       |
| Europe / Italy / Sicily / Palermo     | Human | Female  | 34       |
| Europe / Italy / Sicily / Palermo     | Human | Female  | 35       |
| Europe / Italy / Sicily / Palermo     | Human | Male    | 30       |
| Europe / Italy / Sicily / Palermo     | Human | Female  | 29       |





## Lineage

B.2

B.1

B.1.1

B.1.5

B.1

B.1.1

B.1.1

B.1.1

B.1.1

B.1

B.1

B.1

B.1

B.1

B.1.1

B.1.1

B.1.1

B.1.1

B.1.1

B.1.1

B.1.1

B.1

B.1.5

B.1

B.1

B.1

B.1

B.1

B.1.1

B.1.1

B.1.1

B.1.1

B.1.1

B.1.1

B.1.1

B.1  
B.1  
B.1.1  
B.1  
B.1  
B.1.1  
B.1  
B.1.1  
B.1  
B.2  
B.1.5  
B.1  
B.1  
B.1  
B.1  
B.1  
B.1  
B.1  
B.1  
B.1  
B.1.1  
B.1.1  
B.1  
B.1  
B.1.1  
B.1.1  
B.1.1  
B.1.1  
B.1  
B.1  
B.1.1

B.1  
B.1  
B.1.1  
B.1.1  
B.1.1  
B.1.1  
B.1.1  
B.1  
B.1.1  
B.1  
B.1.1  
B.1.1  
B.1  
B.1.1  
B.1.1  
B.1.5  
B.1  
B.1.5  
B.1  
B.1  
B.1  
B.1  
B.1.1  
B.1  
B.1  
B.1.5  
B.1  
B.1  
B.1.5  
B.1.1  
B.1.1  
B.1.1  
B.1  
B.1.1  
B.1  
B.1  
B.1.1  
B.1  
B.1.1  
B.1.1.1  
B.1  
B.1.1  
B.1.1  
B.1.107  
B.1.107

B.1  
B.1.1  
B.1.1  
B.1.1  
B.1  
B.1.1  
B.1  
B.1  
B.1  
B.1.1  
B.1.1  
B.1.5  
B.1.5.5  
B.1  
B.1.5  
B.1  
B.1.1  
B.1  
B.1  
B.1.1  
B.1.1  
B.1.5  
B.1.5  
B.1  
B.1  
B.1.1  
B.1  
B.1  
B.1





B.1  
B.1  
B.1  
B.1  
B.1  
B.1.1  
B.1.1  
B.1.1  
B.1.1  
B.1.1  
B.1.1  
B.1.1.1  
B.1.1.1  
B.1.1.1  
B.1.1  
B.1.1  
B.1.1  
B.1.1  
B.1.1  
B.1  
B.1.1  
B.1.1  
B.1.1  
B.1.1  
B.1.1  
B.1  
B.1.1  
B.1  
B.1  
B.1.1  
B.1  
B.1.1  
B.1.1  
B.1.1  
B.1  
B.1  
B.1  
B.1  
B.1  
B.1.1  
B.1.1  
B.1.1  
B.1.1

B.1  
B.1.1  
B.1  
B.1  
B.1.1  
B.1  
B.1  
B.1  
B.1.1  
B.1.5  
B.1.1  
B.1  
B.1  
B.1.1  
B.1.1  
B.1.1  
B.1.1  
B.1.1  
B.1.1  
B.1.1  
B.1.1  
B.1  
B.1  
B.1.1  
B.1.1  
B.1.1  
B.1.1  
B.1.1  
B.1  
B.1  
B.1  
B.1.1  
B.1  
B.1.1  
B.1.5  
B.1.1.1  
B.1.1  
B.1.1  
B.1  
B.1.1  
B.1.1  
B.1.1  
B.1  
B.1  
B.1



B.1.1  
B.1  
B.1  
B.1  
B.1.1  
B.1  
B.1.1  
B.1.1  
B.1  
B.1.1  
B.1  
B.1  
B.1.1  
B.1.1  
B.1.1  
B.1  
B.1  
B.1  
B.1.1  
B.1  
B.1  
B.1.1  
B.1.5  
B.1.1  
B.1  
B.1.1  
B.1  
B.1  
B.1.1  
B.1.1  
B.1.1  
B.1.1  
B.1  
B.1  
B.1  
B.1  
B.1.1  
B.1  
B.1  
B.1.1  
B.1.1

B.1.1  
B.1  
B.1  
B.1.1  
B  
B.1  
B.1  
B.1  
B.1.1  
B.1  
B.1  
B.1.5  
B.1  
B.1.1  
B.1  
B.1.1  
B.1.1  
B.1  
B.1.5  
B.1  
B.1.1  
B.1  
B.1.1  
B.1  
B.1.1  
B.1  
B.1.5  
B.1.1  
B.1  
B.1  
B.1  
B.1  
B.1  
B.1  
B.1.1

B.1  
B.1.1  
B.1.1  
B.1.5  
B.1  
B.1.1  
B.1.1  
B.1  
B.1.1  
B.1.1  
B.1  
B.1  
B.1.5  
B.1.1  
B.1.1  
B.1.1  
B.1  
B.1  
B.1.5  
B.1  
B.1  
B.1  
B.1  
B.1  
B.1  
B.1  
B.1  
B.1.5  
B.1  
B.1  
B.1.1  
B.1  
B.1  
B.1.5  
B.1  
B.1.8  
B.1.1  
B.1.5  
B.1  
B.1  
B.1  
B.1.5  
B.1  
B.1.5  
B.1.5

B.1  
B.1  
B.1.5  
B.1.5  
B.1.1  
B.1  
B.1  
B.1  
B.1  
B.1.1  
B.1  
B.1  
B.1.5  
B.1  
B.1.1  
B.1  
B.1.1  
B.1.5  
B.1.1  
B.1  
B.1  
B.1  
B.1.5  
B.1.1  
B.1  
B.1.5  
B.1  
B.1  
B.1  
B.1.1  
B.1  
B.1  
B.1  
B.1.5  
B.1.5  
B.1.1.1  
B.1  
B.1.5  
B.1  
B.1.5  
B.1.1  
B.1  
A.2

B.1  
B.1.1  
B.1.1  
B.1  
B.1.5  
B.1  
B.1.5  
B.1.1  
B.1.5  
B.1.1  
B.1.5  
B.1.1  
B.1  
B.1  
B.1.1  
B.1.1  
B.1.1  
B.1.1  
B.1.5  
B.1  
B.1.1.1  
B.1  
B.1  
B.1.5  
B.1.1  
B.1.1  
B.1  
B.1  
B.1  
B.1.5  
B.1.1  
B.1.5  
B.1  
B.1.1.1  
B.1  
B.1  
B.1.1  
B.1.1  
B.1  
B.1.1  
B.1  
B.1.1  
B.1.1  
B.1  
B.1

B.1.1  
B.1  
B.1  
B.1  
B.1  
B.1  
B.1  
B.1.5  
B.1  
B.1.1  
B.1.1  
B.1.1  
B.1  
B.1  
B.1.1  
B.1  
B.1.1  
B.1.1  
B.1.1  
B.1  
B.1.1  
B.1.1  
B.1.1  
B.1  
B.1.1  
B.1.1  
B.1  
B.1  
B.1.1  
B.1  
B.1.1

B.1.1  
B.1.1  
B.1.1  
B.1.1  
B.1  
B.1  
B.1  
B.1  
B.1  
B.1  
B.1  
B.1.1.1  
B.1.1.1  
B.1.1.1  
B.1  
B.1.1.1  
B.1.1.1  
B.1  
B.1.1.1  
B.1.1.1  
B.1.1.1  
B.1.1.1  
B.1  
B.1.1.1  
B.1.1.1  
B.1.1.1  
B.1.1.1  
B.1.1.1  
B.1  
B.1.1.1  
B.1.1.1  
B.1.1.1  
B.1.1.1  
B.1  
B.1.1  
A  
A  
A  
A  
B  
A  
A  
A

A

A

A

A

A

A

A

B.1.110

B.1.1

B.1

B.1

B.1

B.1

B.1.1

B.1.5

B.1

B.1

B.1.1

B.1.1

B.1

B.1

B.1

B.1

B.1.1.1

B.1.1.25

B.1.1.25

B.1.1

B.1.1.25

B.1.1.25

B.1.1.25

B.1.110

B.1.1

B.1

B.1

B.1

B.1

B.1.1

B.1.5

B.1

B.1
